# Supplementary material for: VvVHP1; 2 Is Transcriptionally Activated by VvMYBA1 and Promotes Anthocyanin Accumulation of Grape Berry Skins via Glucose Signal
Source: Front Plant Sci. 2017 Oct 20;8:1811. doi: 10.3389/fpls.2017.01811 (PMC5655013; doi:10.3389/fpls.2017.01811)
Supplement: Supplementary file 2 [file Table_2.XLSX]

## Sheet: Introduction
Full RNA-Seq data accompanying these experiments were submitted to the sequence read archive (SRA) https://www.ncbi.nlm.nih.gov/sra
The accessions for the submission are:
STUDY: PRJNA401513 (SRP116882)
SAMPLE: Transcriptome of the WT and VHP-overexpressed berry skins (SRS2493556)
EXPERIMENT: VHP_R3 (SRX3162571)
RUN: VHP_overexpressed replicate3.fq.gz (SRR6008560)
EXPERIMENT: WT_R1 (SRX3162572)
RUN: WT replicate1.fq.gz (SRR6008559)
EXPERIMENT: VHP_R1 (SRX3162573)
RUN: VHP_overexpressed replicate1.fq.gz (SRR6008558)
EXPERIMENT: VHP_R2 (SRX3162574)
RUN: VHP_overexpressed replicate2.fq.gz (SRR6008557)
EXPERIMENT: WT_R2 (SRX3162575)
RUN: WT replicate2.fq.gz (SRR6008556)
EXPERIMENT: WT_R3 (SRX3162576)
RUN: WT replicate3.fq.gz (SRR6008555)
To see the data, use SRA RunSelector:
https://www.ncbi.nlm.nih.gov/Traces/study/?acc=SRP116882

## Sheet: RNA-Seq profiles
RNA-Seq profiles of the WT and transgenic berry skins
GeneID	geneLength	Means-WT berry skins	Means-transgenic berry skins	log2-Ratio(transgenic skin/WT skin)	KEGG Orthology	KO	GO Component	GO Function	GO Process	NCBI blast
VIT_211s0016g02850	2273.81	738.335	2116	1.5182	K00850;K00850;K00850;K00850;K00850	ko00010 Glycolysis / Gluconeogenesis (Carbohydrate metabolism)	GO:0005886//plasma membrane;GO:0005945//6-phosphofructokinase complex;GO:0005886//plasma membrane;GO:0005945//6-phosphofructokinase complex;GO:0005886//plasma membrane;GO:0005945//6-phosphofructokinase complex;GO:0005886//plasma membrane;GO:0005945//6-phosphofructokinase complex;GO:0005886//plasma membrane;GO:0005945//6-phosphofructokinase complex	GO:0003872//6-phosphofructokinase activity;GO:0005524//ATP binding;GO:0047334//diphosphate-fructose-6-phosphate 1-phosphotransferase activity;GO:0003872//6-phosphofructokinase activity;GO:0005524//ATP binding;GO:0047334//diphosphate-fructose-6-phosphate 1-phosphotransferase activity;GO:0003872//6-phosphofructokinase activity;GO:0005524//ATP binding;GO:0047334//diphosphate-fructose-6-phosphate 1-p…	GO:0006000//fructose metabolic process;GO:0006002//fructose 6-phosphate metabolic process;GO:0006012//galactose metabolic process;GO:0006013//mannose metabolic process;GO:0006094//gluconeogenesis;GO:0006096//glycolytic process;GO:0006098//pentose-phosphate shunt;GO:0010053//root epidermal cell differentiation;GO:0016310//phosphorylation;GO:0006000//fructose metabolic process;GO:0006002//fructose …	gi|225445037|ref|XP_002283274.1|/0.0/PREDICTED: 6-phosphofructokinase 3-like [Vitis vinifera]
VIT_213s0158g00410	3109	145.343	344.408	1.24111	K00128;K17302;K14400;K13457;K03126	ko00010 Glycolysis / Gluconeogenesis (Carbohydrate metabolism)	-	GO:0003723//RNA binding;GO:0003964//RNA-directed DNA polymerase activity;GO:0008270//zinc ion binding	GO:0006278//RNA-dependent DNA replication	gi|147805812|emb|CAN60544.1|/1.75017E-67/hypothetical protein VITISV_006250 [Vitis vinifera]
VIT_201s0011g03380	2329.05	138.504	327.484	1.23779	K00627;K00627	ko00010 Glycolysis / Gluconeogenesis (Carbohydrate metabolism)	GO:0005739//mitochondrion;GO:0009534//chloroplast thylakoid;GO:0009570//chloroplast stroma;GO:0009941//chloroplast envelope;GO:0016020//membrane;GO:0022626//cytosolic ribosome;GO:0005739//mitochondrion;GO:0009534//chloroplast thylakoid;GO:0009570//chloroplast stroma;GO:0009941//chloroplast envelope;GO:0016020//membrane;GO:0022626//cytosolic ribosome	GO:0004742//dihydrolipoyllysine-residue acetyltransferase activity;GO:0043754//dihydrolipoyllysine-residue (2-methylpropanoyl)transferase activity;GO:0004742//dihydrolipoyllysine-residue acetyltransferase activity;GO:0043754//dihydrolipoyllysine-residue (2-methylpropanoyl)transferase activity	GO:0000096//sulfur amino acid metabolic process;GO:0006086//acetyl-CoA biosynthetic process from pyruvate;GO:0006094//gluconeogenesis;GO:0006096//glycolytic process;GO:0006546//glycine catabolic process;GO:0006636//unsaturated fatty acid biosynthetic process;GO:0006733//oxidoreduction coenzyme metabolic process;GO:0006766//vitamin metabolic process;GO:0007020//microtubule nucleation;GO:0008652//c…	gi|225423947|ref|XP_002282287.1|/0.0/PREDICTED: dihydrolipoyllysine-residue acetyltransferase component of pyruvate dehydrogenase complex, mitochondrial-like [Vitis vinifera]
VIT_208s0007g03830	2027.18	6163.44	13547.9	1.13619	K01623;K01623;K01623	ko00010 Glycolysis / Gluconeogenesis (Carbohydrate metabolism)	GO:0005618//cell wall;GO:0005730//nucleolus;GO:0005740//mitochondrial envelope;GO:0005774//vacuolar membrane;GO:0005794//Golgi apparatus;GO:0005829//cytosol;GO:0005886//plasma membrane;GO:0009506//plasmodesma;GO:0009507//chloroplast;GO:0048046//apoplast;GO:0005618//cell wall;GO:0005730//nucleolus;GO:0005740//mitochondrial envelope;GO:0005829//cytosol;GO:0005886//plasma membrane;GO:0009507//chloro…	GO:0004332//fructose-bisphosphate aldolase activity;GO:0005507//copper ion binding;GO:0004332//fructose-bisphosphate aldolase activity;GO:0005507//copper ion binding;GO:0004332//fructose-bisphosphate aldolase activity;GO:0005507//copper ion binding	GO:0006000//fructose metabolic process;GO:0006013//mannose metabolic process;GO:0006020//inositol metabolic process;GO:0006085//acetyl-CoA biosynthetic process;GO:0006094//gluconeogenesis;GO:0006096//glycolytic process;GO:0006098//pentose-phosphate shunt;GO:0006511//ubiquitin-dependent protein catabolic process;GO:0006833//water transport;GO:0006972//hyperosmotic response;GO:0007030//Golgi organi…	gi|225440976|ref|XP_002283381.1|/0.0/PREDICTED: fructose-bisphosphate aldolase cytoplasmic isozyme [Vitis vinifera]
VIT_209s0018g02090	2940.8	94.9908	338.437	1.82629	K01835;K13506;K01835;K13506;K13506;K01835	ko00010 Glycolysis / Gluconeogenesis ( Carbohydrate metabolism)	GO:0005794//Golgi apparatus;GO:0009507//chloroplast;GO:0016023//cytoplasmic, membrane-bounded vesicle;GO:0005794//Golgi apparatus;GO:0009507//chloroplast;GO:0016023//cytoplasmic, membrane-bounded vesicle;GO:0005794//Golgi apparatus;GO:0009507//chloroplast;GO:0016023//cytoplasmic, membrane-bounded vesicle	GO:0016757//transferase activity, transferring glycosyl groups;GO:0016757//transferase activity, transferring glycosyl groups;GO:0016757//transferase activity, transferring glycosyl groups	GO:0010197//polar nucleus fusion;GO:0048868//pollen tube development;GO:0010197//polar nucleus fusion;GO:0048868//pollen tube development;GO:0010197//polar nucleus fusion;GO:0048868//pollen tube development	gi|298204800|emb|CBI25298.3|/0.0/unnamed protein product [Vitis vinifera]
VIT_211s0016g01190	2951	273.799	864.377	1.65632	K01835;K14294;K13506;K13506;K14294;K01835	ko00010 Glycolysis / Gluconeogenesis ( Carbohydrate metabolism)	GO:0005794//Golgi apparatus;GO:0009507//chloroplast;GO:0005794//Golgi apparatus;GO:0009507//chloroplast	GO:0016757//transferase activity, transferring glycosyl groups;GO:0016757//transferase activity, transferring glycosyl groups	-	gi|225444748|ref|XP_002279041.1|/0.0/PREDICTED: DUF246 domain-containing protein At1g04910 [Vitis vinifera]
VIT_211s0037g00070	2145	478.601	1180.09	1.30089	K00131;K00131	ko00010 Glycolysis / Gluconeogenesis ( Carbohydrate metabolism)	GO:0005829//cytosol;GO:0005737//cytoplasm	GO:0008886//glyceraldehyde-3-phosphate dehydrogenase (NADP+) (non-phosphorylating) activity;GO:0008886//glyceraldehyde-3-phosphate dehydrogenase (NADP+) (non-phosphorylating) activity	GO:0006096//glycolytic process;GO:0006950//response to stress;GO:0055114//oxidation-reduction process;GO:0006096//glycolytic process;GO:0055114//oxidation-reduction process	gi|225445885|ref|XP_002279374.1|/0.0/PREDICTED: NADP-dependent glyceraldehyde-3-phosphate dehydrogenase [Vitis vinifera]
VIT_218s0001g06390	2097	265.963	627.297	1.23599	K01835;K13506;K14294	ko00010 Glycolysis / Gluconeogenesis ( Carbohydrate metabolism)	GO:0005739//mitochondrion;GO:0005794//Golgi apparatus	GO:0016757//transferase activity, transferring glycosyl groups	-	gi|302141996|emb|CBI19199.3|/0.0/unnamed protein product [Vitis vinifera]
VIT_213s0064g01510	2515.57	132.651	311.219	1.22645	K01835;K14294;K13506;K14294;K13506;K01835;K14294;K13506;K01835;K01835;K14294;K13506	ko00010 Glycolysis / Gluconeogenesis ( Carbohydrate metabolism)	GO:0005794//Golgi apparatus;GO:0009507//chloroplast;GO:0005794//Golgi apparatus;GO:0009507//chloroplast;GO:0005794//Golgi apparatus;GO:0009507//chloroplast;GO:0005794//Golgi apparatus;GO:0009507//chloroplast	GO:0016757//transferase activity, transferring glycosyl groups;GO:0016757//transferase activity, transferring glycosyl groups;GO:0016757//transferase activity, transferring glycosyl groups;GO:0016757//transferase activity, transferring glycosyl groups	GO:0048765//root hair cell differentiation;GO:0048765//root hair cell differentiation;GO:0048765//root hair cell differentiation;GO:0048765//root hair cell differentiation	gi|225450232|ref|XP_002266606.1|/0.0/PREDICTED: DUF246 domain-containing protein At1g04910 [Vitis vinifera]
VIT_201s0010g02460	1631.46	7984.87	3622.67	-1.14008	K00134;K00134;K00134;K00134;K00134	ko00010 Glycolysis / Gluconeogenesis （Carbohydrate metabolism）	GO:0005618//cell wall;GO:0005730//nucleolus;GO:0005740//mitochondrial envelope;GO:0005886//plasma membrane;GO:0009507//chloroplast;GO:0048046//apoplast;GO:0005618//cell wall;GO:0005730//nucleolus;GO:0005740//mitochondrial envelope;GO:0005886//plasma membrane;GO:0009507//chloroplast;GO:0048046//apoplast;GO:0005618//cell wall;GO:0005730//nucleolus;GO:0005740//mitochondrial envelope;GO:0005886//plas…	GO:0004365//glyceraldehyde-3-phosphate dehydrogenase (NAD+) (phosphorylating) activity;GO:0005507//copper ion binding;GO:0008270//zinc ion binding;GO:0050661//NADP binding;GO:0051287//NAD binding;GO:0004365//glyceraldehyde-3-phosphate dehydrogenase (NAD+) (phosphorylating) activity;GO:0005507//copper ion binding;GO:0008270//zinc ion binding;GO:0050661//NADP binding;GO:0051287//NAD binding;GO:0004…	GO:0006094//gluconeogenesis;GO:0006096//glycolytic process;GO:0009408//response to heat;GO:0009651//response to salt stress;GO:0009744//response to sucrose;GO:0042542//response to hydrogen peroxide;GO:0042742//defense response to bacterium;GO:0046686//response to cadmium ion;GO:0048316//seed development;GO:0055114//oxidation-reduction process;GO:0006094//gluconeogenesis;GO:0006096//glycolytic pro…	gi|297738348|emb|CBI27549.3|/1.60514E-143/unnamed protein product [Vitis vinifera]
VIT_206s0004g04320	1563	95.0585	34.7106	-1.43729	K00121;K00121;K00121;K00121;K00121	ko00010 Glycolysis / Gluconeogenesis （Carbohydrate metabolism）	-	GO:0000166//nucleotide binding;GO:0008270//zinc ion binding;GO:0051903//S-(hydroxymethyl)glutathione dehydrogenase activity;GO:0000166//nucleotide binding;GO:0004022//alcohol dehydrogenase (NAD) activity;GO:0008270//zinc ion binding;GO:0051903//S-(hydroxymethyl)glutathione dehydrogenase activity;GO:0000166//nucleotide binding;GO:0004022//alcohol dehydrogenase (NAD) activity;GO:0008270//zinc ion b…	GO:0055114//oxidation-reduction process;GO:0055114//oxidation-reduction process;GO:0055114//oxidation-reduction process;GO:0055114//oxidation-reduction process;GO:0055114//oxidation-reduction process	gi|359478643|ref|XP_002281275.2|/5.91335E-117/PREDICTED: LOW QUALITY PROTEIN: alcohol dehydrogenase-like 1-like [Vitis vinifera]
VIT_218s0001g09360	2824	238.93	54.6427	-2.11596	K00121;K13199;K11262;K11267;K18443	ko00010 Glycolysis / Gluconeogenesis （Carbohydrate metabolism）	GO:0009505//plant-type cell wall;GO:0048046//apoplast	GO:0004252//serine-type endopeptidase activity;GO:0042802//identical protein binding	GO:0006508//proteolysis;GO:0043086//negative regulation of catalytic activity;GO:0048359//mucilage metabolic process involved in seed coat development;GO:0080001//mucilage extrusion from seed coat	gi|359492553|ref|XP_002283279.2|/0.0/PREDICTED: subtilisin-like protease-like [Vitis vinifera]
VIT_208s0007g07470	1379	43.8668	7.72093	-2.4152	K01792	ko00010 Glycolysis / Gluconeogenesis （Carbohydrate metabolism）	GO:0009535//chloroplast thylakoid membrane;GO:0010598//NAD(P)H dehydrogenase complex (plastoquinone)	GO:0003824//catalytic activity;GO:0030246//carbohydrate binding	GO:0006098//pentose-phosphate shunt;GO:0009773//photosynthetic electron transport in photosystem I;GO:0010264//myo-inositol hexakisphosphate biosynthetic process	gi|225441631|ref|XP_002282103.1|/0.0/PREDICTED: uncharacterized protein LOC100252010 [Vitis vinifera]
VIT_208s0007g07480	1017	108.663	18.077	-2.54724	K01792	ko00010 Glycolysis / Gluconeogenesis （Carbohydrate metabolism）	GO:0009507//chloroplast;GO:0016020//membrane	GO:0003824//catalytic activity;GO:0030246//carbohydrate binding	GO:0005975//carbohydrate metabolic process;GO:0009773//photosynthetic electron transport in photosystem I;GO:0010628//positive regulation of gene expression;GO:0016070//RNA metabolic process;GO:0032502//developmental process;GO:0044699	gi|297739752|emb|CBI29934.3|/3.63946E-164/unnamed protein product [Vitis vinifera]
VIT_218s0001g15410	1339	1051.48	125.838	-3.05654	K18857	ko00010 Glycolysis / Gluconeogenesis （Carbohydrate metabolism）	GO:0005829//cytosol;GO:0005886//plasma membrane	GO:0000166//nucleotide binding;GO:0004022//alcohol dehydrogenase (NAD) activity;GO:0008270//zinc ion binding	GO:0001666//response to hypoxia;GO:0009651//response to salt stress;GO:0046686//response to cadmium ion;GO:0055114//oxidation-reduction process	gi|225457787|ref|XP_002265158.1|/0.0/PREDICTED: alcohol dehydrogenase 1 [Vitis vinifera]
VIT_214s0006g02555	714	148.39	7.51704	-4.19488	K18857	ko00010 Glycolysis / Gluconeogenesis （Carbohydrate metabolism）	-	-	GO:0006869//lipid transport	gi|225452105|ref|XP_002284190.1|/7.88645E-33/PREDICTED: probable non-specific lipid-transfer protein AKCS9-like isoform 1 [Vitis vinifera]
VIT_214s0006g02570	1460	458.511	15.4903	-4.83291	K18857	ko00010 Glycolysis / Gluconeogenesis （Carbohydrate metabolism）	-	-	-	gi|296087251|emb|CBI33625.3|/4.42438E-32/unnamed protein product [Vitis vinifera]
VIT_213s0084g00090	1903	282.299	20.0738	-3.77316	K01623;K02940;K02940;K01623	ko00010 Glycolysis / Gluconeogenesis (Carbohydrate metabolism)	GO:0005739//mitochondrion;GO:0009507//chloroplast;GO:0016020//membrane;GO:0005739//mitochondrion;GO:0016020//membrane	-	-	gi|296087806|emb|CBI35062.3|/7.69881E-149/unnamed protein product [Vitis vinifera]
VIT_11s0016g03070	192	57.4703	334.855	2.52985	K00844	ko00010 Glycolysis / Gluconeogenesis	GO:0004396//hexokinase activity			gi|100242358|ref|XM_002283572.4|/0.0/PREDICTED: Vitis vinifera hexokinase 1[Vitis vinifera]
VIT_200s0323g00070	907	195.319	1954.99	3.31915	K01051	ko00040 Pentose and glucuronate interconversions (Carbohydrate metabolism)	-	GO:0004857//enzyme inhibitor activity;GO:0030599//pectinesterase activity	GO:0005982//starch metabolic process;GO:0005985//sucrose metabolic process;GO:0043086//negative regulation of catalytic activity	gi|225426925|ref|XP_002264891.1|/2.93021E-106/PREDICTED: 21 kDa protein [Vitis vinifera]
VIT_213s0019g03020	1723	29.2413	104.744	1.81906	K00699;K13030;K13493	ko00040 Pentose and glucuronate interconversions (Carbohydrate metabolism)	-	GO:0016758//transferase activity, transferring hexosyl groups	GO:0008152//metabolic process	gi|225449268|ref|XP_002276617.1|/0.0/PREDICTED: UDP-glycosyltransferase 85A1-like [Vitis vinifera]
VIT_213s0047g00230	2292	136.033	415.625	1.60692	K01051	ko00040 Pentose and glucuronate interconversions (Carbohydrate metabolism)	GO:0005576//extracellular region;GO:0009505//plant-type cell wall	GO:0004857//enzyme inhibitor activity;GO:0030599//pectinesterase activity;GO:0045330//aspartyl esterase activity	GO:0005982//starch metabolic process;GO:0005985//sucrose metabolic process;GO:0009409//response to cold;GO:0009741//response to brassinosteroid;GO:0015824//proline transport;GO:0016126//sterol biosynthetic process;GO:0042545//cell wall modification;GO:0043086//negative regulation of catalytic activity;GO:0045490//pectin catabolic process	gi|359487099|ref|XP_002273427.2|/0.0/PREDICTED: probable pectinesterase/pectinesterase inhibitor 25-like [Vitis vinifera]
VIT_200s0323g00060	891	5102.81	1783.05	-1.51662	K01051	ko00040 Pentose and glucuronate interconversions (Carbohydrate metabolism)	-	GO:0004857//enzyme inhibitor activity;GO:0030599//pectinesterase activity	GO:0005982//starch metabolic process;GO:0005985//sucrose metabolic process;GO:0043086//negative regulation of catalytic activity	gi|225426923|ref|XP_002264799.1|/4.22946E-97/PREDICTED: 21 kDa protein-like [Vitis vinifera]
VIT_211s0016g00590	772	1472.94	363.927	-2.01513	K01051	ko00040 Pentose and glucuronate interconversions (Carbohydrate metabolism)	GO:0009507//chloroplast	GO:0030599//pectinesterase activity;GO:0046910//pectinesterase inhibitor activity	GO:0005982//starch metabolic process;GO:0005985//sucrose metabolic process;GO:0043086//negative regulation of catalytic activity	gi|225444639|ref|XP_002276089.1|/2.42249E-106/PREDICTED: 21 kDa protein-like [Vitis vinifera]
VIT_201s0011g00460	2735	61.8845	12.4354	-2.25938	K01051;K01051	ko00040 Pentose and glucuronate interconversions (Carbohydrate metabolism)	-	-	-	gi|297738090|emb|CBI27291.3|/0.0/unnamed protein product [Vitis vinifera]
VIT_212s0057g00310	2329	1.83312	19.5385	3.03907	K01213;K18171;K18171;K01213;K01213;K00760;K18171;K10866;K01213;K00760;K18171	ko00040 Pentose and glucuronate interconversions (Carbohydrate metabolism)	GO:0005887//integral component of plasma membrane;GO:0009507//chloroplast;GO:0016023//cytoplasmic, membrane-bounded vesicle;GO:0005887//integral component of plasma membrane;GO:0009507//chloroplast;GO:0016023//cytoplasmic, membrane-bounded vesicle;GO:0005886//plasma membrane;GO:0016023//cytoplasmic, membrane-bounded vesicle;GO:0005886//plasma membrane;GO:0016023//cytoplasmic, membrane-bounded ves…	GO:0003824//catalytic activity;GO:0042802//identical protein binding;GO:0003824//catalytic activity;GO:0042802//identical protein binding;GO:0003824//catalytic activity;GO:0042802//identical protein binding;GO:0003824//catalytic activity;GO:0042802//identical protein binding	GO:0009553//embryo sac development;GO:0009555//pollen development;GO:0009790//embryo development;GO:0015969//guanosine tetraphosphate metabolic process;GO:0009553//embryo sac development;GO:0009555//pollen development;GO:0009790//embryo development;GO:0015969//guanosine tetraphosphate metabolic process;GO:0009553//embryo sac development;GO:0009555//pollen development;GO:0009790//embryo developmen…	gi|359485795|ref|XP_002271238.2|/0.0/PREDICTED: uncharacterized protein LOC100247755 [Vitis vinifera]
VIT_213s0019g04910	2215.24	1560.49	703.084	-1.14953	K01728;K01728;K01728;K01728;K01728	ko00040 Pentose and glucuronate interconversions (Carbohydrate metabolism)	GO:0046658//anchored component of plasma membrane;GO:0005886//plasma membrane;GO:0031225//anchored component of membrane;GO:0046658//anchored component of plasma membrane;GO:0046658//anchored component of plasma membrane;GO:0005886//plasma membrane;GO:0031225//anchored component of membrane	GO:0030570//pectate lyase activity;GO:0030570//pectate lyase activity;GO:0030570//pectate lyase activity;GO:0030570//pectate lyase activity;GO:0030570//pectate lyase activity	GO:0000271//polysaccharide biosynthetic process;GO:0009814//defense response, incompatible interaction;GO:0009932//cell tip growth;GO:0010817//regulation of hormone levels;GO:0042547//cell wall modification involved in multidimensional cell growth;GO:0043481//anthocyanin accumulation in tissues in response to UV light;GO:0048767//root hair elongation;GO:0009814//defense response, incompatible int…	gi|225448952|ref|XP_002268818.1|/5.85544E-176/PREDICTED: probable pectate lyase 12 [Vitis vinifera]
VIT_201s0011g00690	2505	1433.01	7616.67	2.40961	K00012	ko00040 Pentose and glucuronate interconversions（Carbohydrate metabolism）	GO:0005618//cell wall;GO:0005634//nucleus;GO:0005829//cytosol	GO:0003979//UDP-glucose 6-dehydrogenase activity;GO:0051287//NAD binding	GO:0005982//starch metabolic process;GO:0005985//sucrose metabolic process;GO:0009117//nucleotide metabolic process;GO:0055114//oxidation-reduction process	gi|225423507|ref|XP_002269692.1|/0.0/PREDICTED: UDP-glucose 6-dehydrogenase-like isoform 1 [Vitis vinifera]
VIT_214s0108g01590	930	643.228	3204.41	2.31555	K00012	ko00040 Pentose and glucuronate interconversions（Carbohydrate metabolism）	GO:0005618//cell wall;GO:0005634//nucleus;GO:0005829//cytosol	GO:0003979//UDP-glucose 6-dehydrogenase activity;GO:0051287//NAD binding	GO:0005982//starch metabolic process;GO:0005985//sucrose metabolic process;GO:0006065//UDP-glucuronate biosynthetic process;GO:0055114//oxidation-reduction process	gi|296082993|emb|CBI22294.3|/5.44758E-41/unnamed protein product [Vitis vinifera]
VIT_204s0043g00310	1166.43	61.7745	154.188	1.311	K01783;K01783;K01783;K01783	ko00030 Pentose phosphate pathway (Carbohydrate metabolism)	GO:0005829//cytosol;GO:0005829//cytosol;GO:0005829//cytosol;GO:0005829//cytosol	-	GO:0006457//protein folding;GO:0009408//response to heat;GO:0009644//response to high light intensity;GO:0034976//response to endoplasmic reticulum stress;GO:0042542//response to hydrogen peroxide;GO:0006457//protein folding;GO:0009408//response to heat;GO:0009644//response to high light intensity;GO:0034976//response to endoplasmic reticulum stress;GO:0042542//response to hydrogen peroxide;GO:00…	gi|225430602|ref|XP_002265803.1|/4.3938E-106/PREDICTED: uncharacterized protein C11orf73 homolog [Vitis vinifera]
VIT_201s0011g05150	970	63.7599	11.3029	-2.43294	K01807	ko00030 Pentose phosphate pathway (Carbohydrate metabolism)	GO:0005634//nucleus;GO:0009507//chloroplast	-	GO:0006952//defense response;GO:0009607//response to biotic stimulus	gi|225424272|ref|XP_002284570.1|/6.89742E-83/PREDICTED: MLP-like protein 28 [Vitis vinifera]
VIT_201s0011g05180	1838	91.6247	8.71933	-3.30418	K01807	ko00030 Pentose phosphate pathway (Carbohydrate metabolism)	GO:0009507//chloroplast	-	GO:0006952//defense response;GO:0009607//response to biotic stimulus	gi|297737681|emb|CBI26882.3|/1.60158E-83/unnamed protein product [Vitis vinifera]
VIT_201s0011g05190	1311	882.742	64.786	-3.75553	K01807	ko00030 Pentose phosphate pathway (Carbohydrate metabolism)	GO:0005634//nucleus;GO:0009507//chloroplast	-	GO:0006952//defense response;GO:0009607//response to biotic stimulus	gi|225424277|ref|XP_002284578.1|/5.939E-81/PREDICTED: MLP-like protein 34 [Vitis vinifera]
VIT_204s0023g03170	1349	488.552	2942.15	2.58876	K01711	ko00051 Fructose and mannose metabolism (Carbohydrate metabolism)	GO:0005794//Golgi apparatus;GO:0005829//cytosol	GO:0000166//nucleotide binding;GO:0005515//protein binding;GO:0008446//GDP-mannose 4,6-dehydratase activity;GO:0050662//coenzyme binding	GO:0006000//fructose metabolic process;GO:0006007//glucose catabolic process;GO:0006012//galactose metabolic process;GO:0009298//GDP-mannose biosynthetic process;GO:0009826//unidimensional cell growth;GO:0042351//'de novo' GDP-L-fucose biosynthetic process	gi|225431177|ref|XP_002269841.1|/0.0/PREDICTED: GDP-mannose 4,6 dehydratase 2 [Vitis vinifera]
VIT_204s0023g03160	3476	561.394	2998.46	2.41584	K01711	ko00051 Fructose and mannose metabolism (Carbohydrate metabolism)	GO:0005739//mitochondrion	-	-	gi|225431179|ref|XP_002269956.1|/2.13466E-117/PREDICTED: uncharacterized protein LOC100259183 [Vitis vinifera]
VIT_210s0003g00290	2411	96.2437	289.044	1.58036	K00863;K09338	ko00051 Fructose and mannose metabolism (Carbohydrate metabolism)	GO:0005667//transcription factor complex	GO:0000976//transcription regulatory region sequence-specific DNA binding;GO:0003700//transcription factor activity, sequence-specific DNA binding;GO:0042803//protein homodimerization activity	GO:0009637//response to blue light;GO:0009651//response to salt stress;GO:0009965//leaf morphogenesis;GO:0010228//vegetative to reproductive phase transition of meristem;GO:0045893//positive regulation of transcription, DNA-templated	gi|359483496|ref|XP_002273559.2|/0.0/PREDICTED: uncharacterized protein LOC100247033 [Vitis vinifera]
VIT_200s0304g00080	1857	13.1857	136.812	3.31545	K01087;K01087	ko00500 Starch and sucrose metabolism (Carbohydrate metabolism)	GO:0005634//nucleus;GO:0009507//chloroplast;GO:0005634//nucleus;GO:0009507//chloroplast	GO:0004805//trehalose-phosphatase activity;GO:0004805//trehalose-phosphatase activity	GO:0005982//starch metabolic process;GO:0005985//sucrose metabolic process;GO:0005992//trehalose biosynthetic process;GO:0046686//response to cadmium ion;GO:0005982//starch metabolic process;GO:0005985//sucrose metabolic process;GO:0005992//trehalose biosynthetic process;GO:0046686//response to cadmium ion	gi|225439022|ref|XP_002263078.1|/0.0/PREDICTED: trehalose-phosphate phosphatase [Vitis vinifera]
VIT_200s2526g00010	692	4.36741	46.5338	3.2412	K01179	ko00500 Starch and sucrose metabolism (Carbohydrate metabolism)	GO:0005739//mitochondrion;GO:0005886//plasma membrane;GO:0016021//integral component of membrane	GO:0005509//calcium ion binding;GO:0008810//cellulase activity;GO:0016740//transferase activity	GO:0005982//starch metabolic process;GO:0005985//sucrose metabolic process;GO:0030245//cellulose catabolic process	gi|359497829|ref|XP_003635661.1|/2.40183E-119/PREDICTED: endoglucanase 12-like, partial [Vitis vinifera]
VIT_200s0340g00050	2149	36.9335	144.086	1.94613	K01179;K08472	ko00500 Starch and sucrose metabolism (Carbohydrate metabolism)	GO:0005739//mitochondrion;GO:0005886//plasma membrane;GO:0016021//integral component of membrane	GO:0005509//calcium ion binding;GO:0008810//cellulase activity;GO:0016740//transferase activity	GO:0005982//starch metabolic process;GO:0005985//sucrose metabolic process;GO:0030245//cellulose catabolic process	gi|296080957|emb|CBI18623.3|/0.0/unnamed protein product [Vitis vinifera]
VIT_218s0075g00340	717	40.2532	116.59	1.51989	K00696	ko00500 Starch and sucrose metabolism (Carbohydrate metabolism)	GO:0005634//nucleus;GO:0005886//plasma membrane	GO:0043531//ADP binding;GO:0046524//sucrose-phosphate synthase activity	GO:0001666//response to hypoxia;GO:0005982//starch metabolic process;GO:0005985//sucrose metabolic process;GO:0006952//defense response;GO:0007165//signal transduction;GO:0010075//regulation of meristem growth;GO:0019375//galactolipid biosynthetic process	gi|296081081|emb|CBI18275.3|/4.01862E-103/unnamed protein product [Vitis vinifera]
VIT_218s0089g00410	3719.55	1555.06	3718.23	1.25731	K00696;K00696;K00696;K00696;K00696;K00696;K00696;K00696;K00696	ko00500 Starch and sucrose metabolism (Carbohydrate metabolism)	GO:0005634//nucleus;GO:0005886//plasma membrane;GO:0005634//nucleus;GO:0005886//plasma membrane;GO:0005634//nucleus;GO:0005886//plasma membrane;GO:0005634//nucleus;GO:0005886//plasma membrane;GO:0005634//nucleus;GO:0005886//plasma membrane;GO:0005634//nucleus;GO:0005886//plasma membrane;GO:0005634//nucleus;GO:0005886//plasma membrane;GO:0005634//nucleus;GO:0005886//plasma membrane;GO:0005634//nuc…	GO:0046524//sucrose-phosphate synthase activity;GO:0047947;GO:0046524//sucrose-phosphate synthase activity;GO:0047947;GO:0046524//sucrose-phosphate synthase activity;GO:0046524//sucrose-phosphate synthase activity;GO:0047947;GO:0046524//sucrose-phosphate synthase activity;GO:0047947;GO:0046524//sucrose-phosphate synthase activity;GO:0046524//sucrose-phosphate synthase activity;GO:0046524//sucrose…	GO:0001666//response to hypoxia;GO:0005982//starch metabolic process;GO:0005985//sucrose metabolic process;GO:0006558//L-phenylalanine metabolic process;GO:0006570//tyrosine metabolic process;GO:0010075//regulation of meristem growth;GO:0019375//galactolipid biosynthetic process;GO:0001666//response to hypoxia;GO:0005982//starch metabolic process;GO:0005985//sucrose metabolic process;GO:0006558//…	gi|225459996|ref|XP_002270813.1|/0.0/PREDICTED: probable sucrose-phosphate synthase 4 [Vitis vinifera]
VIT_201s0011g00730	2983	176.575	47.7252	-1.87391	K00688	ko00500 Starch and sucrose metabolism (Carbohydrate metabolism)	GO:0005829//cytosol;GO:0009501//amyloplast;GO:0009570//chloroplast stroma	GO:0008184//glycogen phosphorylase activity;GO:0030170//pyridoxal phosphate binding;GO:0042802//identical protein binding	GO:0009409//response to cold;GO:0009414//response to water deprivation;GO:0019252//starch biosynthetic process;GO:0042742//defense response to bacterium	gi|359472806|ref|XP_002274575.2|/0.0/PREDICTED: alpha-1,4 glucan phosphorylase L-2 isozyme, chloroplastic/amyloplastic-like [Vitis vinifera]
VIT_205s0077g00280	1970	1045.36	3272.26	1.6457	K01177	ko00500 Starch and sucrose metabolism (Carbohydrate metabolism)	GO:0005634//nucleus;GO:0005829//cytosol;GO:0005886//plasma membrane;GO:0009507//chloroplast	GO:0004674//protein serine/threonine kinase activity;GO:0005524//ATP binding;GO:0016161//beta-amylase activity;GO:0033612//receptor serine/threonine kinase binding;GO:0043169//cation binding;GO:0043621//protein self-association	GO:0000271//polysaccharide biosynthetic process;GO:0005983//starch catabolic process;GO:0005985//sucrose metabolic process;GO:0006468//protein phosphorylation;GO:0007020//microtubule nucleation;GO:0007169//transmembrane receptor protein tyrosine kinase signaling pathway;GO:0009069//serine family amino acid metabolic process;GO:0009414//response to water deprivation;GO:0009825//multidimensional ce…	gi|225433328|ref|XP_002285569.1|/0.0/PREDICTED: beta-amylase 1, chloroplastic isoform 1 [Vitis vinifera]
VIT_208s0007g08310	2922.88	3728.79	14084.1	1.91711	K06617;K06617;K06617;K06617;K06617;K06617;K06617;K06617;K06617	ko00052 Galactose metabolism (Carbohydrate metabolism)	GO:0005737//cytoplasm;GO:0009506//plasmodesma;GO:0005737//cytoplasm;GO:0009506//plasmodesma;GO:0005737//cytoplasm;GO:0009506//plasmodesma;GO:0005737//cytoplasm;GO:0009506//plasmodesma;GO:0005737//cytoplasm;GO:0009506//plasmodesma;GO:0005737//cytoplasm;GO:0009506//plasmodesma;GO:0005737//cytoplasm;GO:0009506//plasmodesma;GO:0005737//cytoplasm;GO:0009506//plasmodesma;GO:0005737//cytoplasm;GO:000950…	GO:0047274//galactinol-sucrose galactosyltransferase activity;GO:0052692//raffinose alpha-galactosidase activity;GO:0047274//galactinol-sucrose galactosyltransferase activity;GO:0052692//raffinose alpha-galactosidase activity;GO:0047274//galactinol-sucrose galactosyltransferase activity;GO:0052692//raffinose alpha-galactosidase activity;GO:0047274//galactinol-sucrose galactosyltransferase activit…	GO:0006012//galactose metabolic process;GO:0006979//response to oxidative stress;GO:0034484//raffinose catabolic process;GO:0080167//response to karrikin;GO:0006012//galactose metabolic process;GO:0006979//response to oxidative stress;GO:0034484//raffinose catabolic process;GO:0080167//response to karrikin;GO:0006012//galactose metabolic process;GO:0006979//response to oxidative stress;GO:0034484…	gi|225441787|ref|XP_002283653.1|/0.0/PREDICTED: probable galactinol--sucrose galactosyltransferase 2 [Vitis vinifera]
VIT_211s0016g05770	2531	803.632	2922.65	1.86187	K06617	ko00052 Galactose metabolism (Carbohydrate metabolism)	GO:0009506//plasmodesma;GO:0009507//chloroplast	GO:0047268//galactinol-raffinose galactosyltransferase activity;GO:0047274//galactinol-sucrose galactosyltransferase activity;GO:0052692//raffinose alpha-galactosidase activity	GO:0006012//galactose metabolic process;GO:0006979//response to oxidative stress;GO:0009409//response to cold;GO:0009744//response to sucrose;GO:0009750//response to fructose;GO:0080167//response to karrikin	gi|359484223|ref|XP_002285418.2|/0.0/PREDICTED: probable galactinol--sucrose galactosyltransferase 6-like [Vitis vinifera]
VIT_207s0031g02480	3348	463.827	1092.13	1.23437	K12309	ko00052 Galactose metabolism (Carbohydrate metabolism)	GO:0009341//beta-galactosidase complex;GO:0009505//plant-type cell wall;GO:0016023//cytoplasmic, membrane-bounded vesicle;GO:0048046//apoplast	GO:0004565//beta-galactosidase activity;GO:0030246//carbohydrate binding;GO:0043169//cation binding	GO:0006012//galactose metabolic process;GO:0006027//glycosaminoglycan catabolic process;GO:0006687//glycosphingolipid metabolic process;GO:0046486//glycerolipid metabolic process;GO:0080167//response to karrikin	gi|359480881|ref|XP_003632537.1|/0.0/PREDICTED: beta-galactosidase 3-like [Vitis vinifera]
VIT_210s0071g01100	1499	110.317	41.9598	-1.38151	K07407	ko00052 Galactose metabolism (Carbohydrate metabolism)	GO:0009505//plant-type cell wall;GO:0016023//cytoplasmic, membrane-bounded vesicle;GO:0048046//apoplast	GO:0016757//transferase activity, transferring glycosyl groups;GO:0043169//cation binding;GO:0052692//raffinose alpha-galactosidase activity	GO:0009311//oligosaccharide metabolic process;GO:0016139//glycoside catabolic process;GO:0046477//glycosylceramide catabolic process	gi|225463807|ref|XP_002270791.1|/0.0/PREDICTED: alpha-galactosidase [Vitis vinifera]
VIT_214s0060g00790	1301	23.2277	112.356	2.24413	K18819	ko00052 Galactose metabolism (Carbohydrate metabolism)	GO:0005737//cytoplasm	GO:0016760//cellulose synthase (UDP-forming) activity;GO:0046872//metal ion binding;GO:0047216//inositol 3-alpha-galactosyltransferase activity	GO:0005982//starch metabolic process;GO:0005985//sucrose metabolic process;GO:0006011//UDP-glucose metabolic process;GO:0006012//galactose metabolic process;GO:0009408//response to heat;GO:0009409//response to cold;GO:0009414//response to water deprivation;GO:0009644//response to high light intensity;GO:0030244//cellulose biosynthetic process;GO:0042542//response to hydrogen peroxide	gi|225450521|ref|XP_002281304.1|/0.0/PREDICTED: glycogenin-2 [Vitis vinifera]
VIT_214s0060g00810	1295	39.5705	114.607	1.51957	K18819	ko00052 Galactose metabolism (Carbohydrate metabolism)	GO:0005737//cytoplasm	GO:0016760//cellulose synthase (UDP-forming) activity;GO:0046872//metal ion binding;GO:0047216//inositol 3-alpha-galactosyltransferase activity	GO:0005982//starch metabolic process;GO:0005985//sucrose metabolic process;GO:0006011//UDP-glucose metabolic process;GO:0006012//galactose metabolic process;GO:0009408//response to heat;GO:0009409//response to cold;GO:0009414//response to water deprivation;GO:0009644//response to high light intensity;GO:0030244//cellulose biosynthetic process;GO:0042542//response to hydrogen peroxide	gi|225450523|ref|XP_002281369.1|/0.0/PREDICTED: glycogenin-2 [Vitis vinifera]
VIT_206s0004g03020	3281	122.162	38.1302	-1.66384	K12309;K12309	ko00052 Galactose metabolism (Carbohydrate metabolism)	GO:0005576//extracellular region;GO:0005618//cell wall;GO:0009341//beta-galactosidase complex;GO:0005576//extracellular region;GO:0005618//cell wall;GO:0009341//beta-galactosidase complex	GO:0004565//beta-galactosidase activity;GO:0030246//carbohydrate binding;GO:0043169//cation binding;GO:0004565//beta-galactosidase activity;GO:0030246//carbohydrate binding;GO:0043169//cation binding	GO:0006012//galactose metabolic process;GO:0006027//glycosaminoglycan catabolic process;GO:0006687//glycosphingolipid metabolic process;GO:0046486//glycerolipid metabolic process;GO:0006012//galactose metabolic process;GO:0006027//glycosaminoglycan catabolic process;GO:0006687//glycosphingolipid metabolic process;GO:0046486//glycerolipid metabolic process	gi|359478691|ref|XP_002285084.2|/0.0/PREDICTED: beta-galactosidase 8-like [Vitis vinifera]
VIT_210s0003g02030	3845	163.854	437.346	1.41296	K14638	solute carrier family 15 (peptide/histidine transporter), member 3/4 (Transporters)	GO:0005829//cytosol;GO:0009507//chloroplast;GO:0016020//membrane	GO:0000166//nucleotide binding;GO:0005507//copper ion binding;GO:0008270//zinc ion binding;GO:0015446//arsenite-transmembrane transporting ATPase activity;GO:0016616//oxidoreductase activity, acting on the CH-OH group of donors, NAD or NADP as acceptor;GO:0016756//glutathione gamma-glutamylcysteinyltransferase activity;GO:0046870//cadmium ion binding;GO:0048037//cofactor binding;GO:0071992//phyto…	GO:0000165//MAPK cascade;GO:0002679//respiratory burst involved in defense response;GO:0006612//protein targeting to membrane;GO:0006635//fatty acid beta-oxidation;GO:0006812//cation transport;GO:0009409//response to cold;GO:0009595//detection of biotic stimulus;GO:0009697//salicylic acid biosynthetic process;GO:0009809//lignin biosynthetic process;GO:0009862//systemic acquired resistance, salicy…	gi|297740573|emb|CBI30755.3|/0.0/unnamed protein product [Vitis vinifera]
VIT_218s0041g00560	1942	37.0218	94.7707	1.34153	K14638;K14638;K14638	solute carrier family 15 (peptide/histidine transporter), member 3/4 (Transporters)	GO:0005886//plasma membrane;GO:0016021//integral component of membrane;GO:0005886//plasma membrane;GO:0016021//integral component of membrane;GO:0005886//plasma membrane;GO:0016021//integral component of membrane	GO:0005215//transporter activity;GO:0005215//transporter activity;GO:0005215//transporter activity	GO:0006857//oligopeptide transport;GO:0009624//response to nematode;GO:0006857//oligopeptide transport;GO:0009624//response to nematode;GO:0006857//oligopeptide transport;GO:0009624//response to nematode	gi|147821382|emb|CAN63512.1|/0.0/hypothetical protein VITISV_031693 [Vitis vinifera]
VIT_202s0154g00260	2363	200.638	30.1215	-2.71081	K14638;K14638;K14638	solute carrier family 15 (peptide/histidine transporter), member 3/4 (Transporters)	GO:0005886//plasma membrane;GO:0016021//integral component of membrane;GO:0005886//plasma membrane;GO:0016021//integral component of membrane;GO:0005886//plasma membrane;GO:0016021//integral component of membrane	GO:0015112//nitrate transmembrane transporter activity;GO:0015112//nitrate transmembrane transporter activity;GO:0015112//nitrate transmembrane transporter activity	GO:0006857//oligopeptide transport;GO:0009414//response to water deprivation;GO:0010167//response to nitrate;GO:0015706//nitrate transport;GO:0006857//oligopeptide transport;GO:0009414//response to water deprivation;GO:0010167//response to nitrate;GO:0015706//nitrate transport;GO:0006857//oligopeptide transport;GO:0009414//response to water deprivation;GO:0010167//response to nitrate;GO:0015706//…	gi|225427035|ref|XP_002266951.1|/0.0/PREDICTED: nitrate transporter 1.1 [Vitis vinifera]
VIT_201s0150g00250	2248	730.403	295.018	-1.30609	K14638	solute carrier family 15 (peptide/histidine transporter), member 3/4 (Transporters)	GO:0005886//plasma membrane;GO:0016021//integral component of membrane	GO:0042936//dipeptide transporter activity;GO:0042937//tripeptide transporter activity	GO:0006807//nitrogen compound metabolic process;GO:0009860//pollen tube growth;GO:0042938//dipeptide transport;GO:0042939//tripeptide transport	gi|225425292|ref|XP_002272176.1|/0.0/PREDICTED: probable peptide/nitrate transporter At5g13400 [Vitis vinifera]
VIT_218s0041g00550	1860	35.7222	10.418	-1.71923	K14638	solute carrier family 15 (peptide/histidine transporter), member 3/4 (Transporters)	GO:0005886//plasma membrane;GO:0016021//integral component of membrane	GO:0005215//transporter activity	GO:0006857//oligopeptide transport;GO:0009624//response to nematode	gi|359493324|ref|XP_003634571.1|/0.0/PREDICTED: uncharacterized protein LOC100853111 [Vitis vinifera]
VIT_212s0035g00880	1033	87.7565	348.94	1.98381	K14611	solute carrier family 23 (nucleobase transporter), member 1/2 (Transporters)	-	GO:0016740//transferase activity;GO:0016829//lyase activity	-	gi|225448138|ref|XP_002263444.1|/1.95783E-98/PREDICTED: uncharacterized protein LOC100266411 [Vitis vinifera]
VIT_218s0001g07320	1214	287.442	713.952	1.3107	K15104	solute carrier family 25 (Transporters)	GO:0016021//integral component of membrane;GO:0031966//mitochondrial membrane	GO:0005310//dicarboxylic acid transmembrane transporter activity	GO:0006835//dicarboxylic acid transport;GO:0006839//mitochondrial transport;GO:0055085//transmembrane transport	gi|225459119|ref|XP_002285693.1|/1.68599E-156/PREDICTED: probable mitochondrial 2-oxoglutarate/malate carrier protein-like [Vitis vinifera]
VIT_214s0068g00890	2894	151.219	336.234	1.14958	K14684;K14684;K14684	solute carrier family 25 (Transporters)	GO:0016021//integral component of membrane;GO:0005743//mitochondrial inner membrane;GO:0016021//integral component of membrane;GO:0016021//integral component of membrane	GO:0005509//calcium ion binding;GO:0005509//calcium ion binding;GO:0005509//calcium ion binding	GO:0055085//transmembrane transport;GO:0015867//ATP transport;GO:0030048//actin filament-based movement;GO:0051645//Golgi localization;GO:0051646//mitochondrion localization;GO:0055085//transmembrane transport;GO:0060151//peroxisome localization;GO:0055085//transmembrane transport	gi|225451643|ref|XP_002277297.1|/0.0/PREDICTED: calcium-binding mitochondrial carrier protein SCaMC-1 [Vitis vinifera]
VIT_218s0001g15700	1790	22.322	1.62649	-3.35267	K07300	Ca2+:H+ antiporter (Transporters)	GO:0005737//cytoplasm	GO:0017089//glycolipid transporter activity;GO:0051861//glycolipid binding	GO:0006661//phosphatidylinositol biosynthetic process;GO:0046836//glycolipid transport	gi|359492319|ref|XP_002278042.2|/2.15454E-131/PREDICTED: pleckstrin homology domain-containing family A member 8-like [Vitis vinifera]
VIT_201s0146g00260	3792.69	1188.56	6835.15	2.52313	K13430;K15382;K13430;K15382;K15382;K13430	ko04626 Plant-pathogen interaction (Environmental adaptation)	GO:0005887//integral component of plasma membrane;GO:0005887//integral component of plasma membrane;GO:0005887//integral component of plasma membrane;GO:0016023//cytoplasmic, membrane-bounded vesicle	GO:0008515//sucrose transmembrane transporter activity;GO:0008515//sucrose transmembrane transporter activity;GO:0008515//sucrose transmembrane transporter activity	GO:0010150//leaf senescence;GO:0015770//sucrose transport;GO:0071215//cellular response to abscisic acid stimulus;GO:0071446//cellular response to salicylic acid stimulus;GO:0071470//cellular response to osmotic stress;GO:0010150//leaf senescence;GO:0015770//sucrose transport;GO:0071215//cellular response to abscisic acid stimulus;GO:0071446//cellular response to salicylic acid stimulus;GO:007147…	gi|225425180|ref|XP_002264875.1|/1.61982E-97/PREDICTED: bidirectional sugar transporter SWEET15 [Vitis vinifera]
VIT_210s0003g04530	3658	148.708	435.162	1.54513	K14427	solute carrier family 12 (potassium/chloride transporter), member 4/5/6 (Transporters)	GO:0005768//endosome;GO:0005794//Golgi apparatus;GO:0005802//trans-Golgi network;GO:0005886//plasma membrane;GO:0016021//integral component of membrane	GO:0008511//sodium:potassium:chloride symporter activity;GO:0015379//potassium:chloride symporter activity	GO:0006821//chloride transport;GO:0055064//chloride ion homeostasis;GO:0055075//potassium ion homeostasis;GO:0071805//potassium ion transmembrane transport	gi|359483927|ref|XP_003633037.1|/0.0/PREDICTED: cation-chloride cotransporter 1 isoform 2 [Vitis vinifera]
VIT_211s0118g00710	3940.11	76.2187	190.076	1.31138	K13783;K13783;K13783	MFS transporter, OPA family, solute carrier family 37 (Transporters Solute Carrier Family (SLC))	GO:0005739//mitochondrion;GO:0009507//chloroplast;GO:0016021//integral component of membrane;GO:0005739//mitochondrion;GO:0009507//chloroplast;GO:0016021//integral component of membrane;GO:0005739//mitochondrion;GO:0009507//chloroplast;GO:0016021//integral component of membrane	GO:0005351//sugar:proton symporter activity;GO:0005351//sugar:proton symporter activity;GO:0005351//sugar:proton symporter activity	GO:0006355//regulation of transcription, DNA-templated;GO:0008643//carbohydrate transport;GO:0015706//nitrate transport;GO:0055062//phosphate ion homeostasis;GO:0055085//transmembrane transport;GO:0006355//regulation of transcription, DNA-templated;GO:0008643//carbohydrate transport;GO:0015706//nitrate transport;GO:0055062//phosphate ion homeostasis;GO:0055085//transmembrane transport;GO:0006355/…	gi|359484696|ref|XP_002267328.2|/0.0/PREDICTED: putative glycerol-3-phosphate transporter 5-like [Vitis vinifera]
VIT_218s0122g00780	2784.42	49.9693	176.157	1.80504	K08176;K08176	MFS transporter, PHS family, inorganic phosphate transport (Transporters Major Facilitator Superfamily (MFS))	GO:0005739//mitochondrion;GO:0005886//plasma membrane;GO:0009507//chloroplast;GO:0016021//integral component of membrane;GO:0005739//mitochondrion;GO:0005886//plasma membrane;GO:0009507//chloroplast;GO:0016021//integral component of membrane	GO:0005351//sugar:proton symporter activity;GO:0015415//phosphate ion transmembrane-transporting ATPase activity;GO:0005351//sugar:proton symporter activity;GO:0015415//phosphate ion transmembrane-transporting ATPase activity	GO:0006817//phosphate ion transport;GO:0008643//carbohydrate transport;GO:0055085//transmembrane transport;GO:0006817//phosphate ion transport;GO:0008643//carbohydrate transport;GO:0055085//transmembrane transport	gi|225457638|ref|XP_002274930.1|/0.0/PREDICTED: probable inorganic phosphate transporter 1-9 [Vitis vinifera]
VIT_210s0003g03920	3141	350.209	105.579	-1.72401	K08150;K02874;K08150;K02874;K02874;K08150	MFS transporter, SP family, solute carrier family 2 (myo-inositol transporter), member 13 (Transporters)	GO:0009507//chloroplast;GO:0015934//large ribosomal subunit;GO:0009507//chloroplast;GO:0015934//large ribosomal subunit;GO:0009507//chloroplast;GO:0015934//large ribosomal subunit	GO:0003735//structural constituent of ribosome;GO:0003735//structural constituent of ribosome;GO:0003735//structural constituent of ribosome	GO:0000394//RNA splicing, via endonucleolytic cleavage and ligation;GO:0006354//DNA-templated transcription, elongation;GO:0006412//translation;GO:0009086//methionine biosynthetic process;GO:0042254//ribosome biogenesis;GO:0000394//RNA splicing, via endonucleolytic cleavage and ligation;GO:0006354//DNA-templated transcription, elongation;GO:0006412//translation;GO:0009086//methionine biosynthetic…	gi|225443920|ref|XP_002278662.1|/1.15486E-82/PREDICTED: 50S ribosomal protein L14-like [Vitis vinifera]
VIT_210s0003g03930	3538.83	873.28	228.142	-1.93362	K08150;K08150;K08150;K08150;K08150;K08150	MFS transporter, SP family, solute carrier family 2 (myo-inositol transporter), member 13 (Transporters)	GO:0005886//plasma membrane;GO:0016021//integral component of membrane;GO:0090406//pollen tube;GO:0005886//plasma membrane;GO:0016021//integral component of membrane;GO:0090406//pollen tube;GO:0005886//plasma membrane;GO:0016021//integral component of membrane;GO:0090406//pollen tube;GO:0005886//plasma membrane;GO:0016021//integral component of membrane;GO:0090406//pollen tube;GO:0005886//plasma …	GO:0005351//sugar:proton symporter activity;GO:0005366//myo-inositol:proton symporter activity;GO:0032440//2-alkenal reductase [NAD(P)] activity;GO:0005351//sugar:proton symporter activity;GO:0005366//myo-inositol:proton symporter activity;GO:0032440//2-alkenal reductase [NAD(P)] activity;GO:0005351//sugar:proton symporter activity;GO:0005366//myo-inositol:proton symporter activity;GO:0032440//2-…	GO:0006812//cation transport;GO:0006863//purine nucleobase transport;GO:0008643//carbohydrate transport;GO:0015798//myo-inositol transport;GO:0023052//signaling;GO:0055085//transmembrane transport;GO:0055114//oxidation-reduction process;GO:0006812//cation transport;GO:0006863//purine nucleobase transport;GO:0008643//carbohydrate transport;GO:0015798//myo-inositol transport;GO:0023052//signaling;G…	gi|225443922|ref|XP_002278732.1|/0.0/PREDICTED: probable inositol transporter 2 isoform 1 [Vitis vinifera]
VIT_211s0016g05330	1960.88	380.525	123.388	-1.61991	K14430;K15731;K14430;K14430	phosphate transporter (Transporters)	GO:0005634//nucleus;GO:0005634//nucleus;GO:0005634//nucleus	-	GO:0006817//phosphate ion transport;GO:0019375//galactolipid biosynthetic process;GO:0045892//negative regulation of transcription, DNA-templated;GO:0080040//positive regulation of cellular response to phosphate starvation;GO:0006817//phosphate ion transport;GO:0019375//galactolipid biosynthetic process;GO:0045892//negative regulation of transcription, DNA-templated;GO:0080040//positive regulatio…	gi|225445503|ref|XP_002285199.1|/6.21621E-109/PREDICTED: SPX domain-containing protein 2 isoform 1 [Vitis vinifera]
VIT_214s0068g00850	3207.81	777.803	2464.55	1.66306	K03549;K03549;K03549	Transporters	GO:0009507//chloroplast;GO:0016020//membrane;GO:0009507//chloroplast;GO:0016020//membrane;GO:0009507//chloroplast;GO:0016020//membrane	GO:0015079//potassium ion transmembrane transporter activity;GO:0015079//potassium ion transmembrane transporter activity;GO:0015079//potassium ion transmembrane transporter activity	GO:0016036//cellular response to phosphate starvation;GO:0019375//galactolipid biosynthetic process;GO:0019761//glucosinolate biosynthetic process;GO:0071805//potassium ion transmembrane transport;GO:0016036//cellular response to phosphate starvation;GO:0019375//galactolipid biosynthetic process;GO:0019761//glucosinolate biosynthetic process;GO:0071805//potassium ion transmembrane transport;GO:00…	gi|359488419|ref|XP_002277453.2|/0.0/PREDICTED: potassium transporter 4-like [Vitis vinifera]
VIT_214s0068g00840	4632.28	513.17	1495.79	1.54226	K03549;K04681;K04681;K03549;K04681;K03549;K03549;K04681;K03549;K04681	Transporters	GO:0005634//nucleus;GO:0005829//cytosol;GO:0005634//nucleus;GO:0005829//cytosol;GO:0005634//nucleus;GO:0005829//cytosol;GO:0005634//nucleus;GO:0005829//cytosol;GO:0005634//nucleus;GO:0005829//cytosol	-	GO:0000082//G1/S transition of mitotic cell cycle;GO:0001558//regulation of cell growth;GO:0001708//cell fate specification;GO:0006349//regulation of gene expression by genetic imprinting;GO:0006355//regulation of transcription, DNA-templated;GO:0009553//embryo sac development;GO:0009567//double fertilization forming a zygote and endosperm;GO:0010090//trichome morphogenesis;GO:0022619//generative…	gi|225451657|ref|XP_002276265.1|/0.0/PREDICTED: retinoblastoma-related protein-like [Vitis vinifera]
VIT_218s0001g11760	2428	114.163	452.604	1.98716	K03327	Transporters Solute Carrier Family	GO:0005774//vacuolar membrane;GO:0005886//plasma membrane	GO:0015238//drug transmembrane transporter activity;GO:0015297//antiporter activity	GO:0006855//drug transmembrane transport;GO:0009624//response to nematode;GO:0009835//fruit ripening	gi|225458414|ref|XP_002281913.1|/0.0/PREDICTED: protein TRANSPARENT TESTA 12 [Vitis vinifera]
VIT_205s0049g00770	1479	260.693	5745.52	4.45875	K14692	solute carrier family 30 (zinc transporter), member 5/7 (Transporters)	-	-	-	gi|359477792|ref|XP_002281153.2|/1.16709E-52/PREDICTED: proline-rich 33 kDa extensin-related protein-like [Vitis vinifera]
VIT_205s0049g00840	1017	88.3192	521.245	2.5528	K14692	solute carrier family 30 (zinc transporter), member 5/7 (Transporters)	-	-	-	gi|359477734|ref|XP_002285082.2|/5.76554E-44/PREDICTED: proline-rich 33 kDa extensin-related protein-like isoform 2 [Vitis vinifera]
VIT_208s0007g03560	650	2.58327	16.1617	2.38954	K15287	solute carrier family 35 (Transporters)	GO:0016020//membrane;GO:0016023//cytoplasmic, membrane-bounded vesicle	-	-	gi|359481998|ref|XP_003632702.1|/2.95783E-84/PREDICTED: solute carrier family 35 member F1-like [Vitis vinifera]
VIT_201s0026g01890	1629.12	122.087	455.464	1.89409	K15275;K15275;K15275;K15275;K15275	solute carrier family 35 (Transporters)	GO:0009507//chloroplast;GO:0030173//integral component of Golgi membrane;GO:0030176//integral component of endoplasmic reticulum membrane;GO:0009507//chloroplast;GO:0030173//integral component of Golgi membrane;GO:0030176//integral component of endoplasmic reticulum membrane;GO:0009507//chloroplast;GO:0030173//integral component of Golgi membrane;GO:0030176//integral component of endoplasmic reti…	GO:0005459//UDP-galactose transmembrane transporter activity;GO:0005460//UDP-glucose transmembrane transporter activity;GO:0005459//UDP-galactose transmembrane transporter activity;GO:0005460//UDP-glucose transmembrane transporter activity;GO:0005459//UDP-galactose transmembrane transporter activity;GO:0005460//UDP-glucose transmembrane transporter activity;GO:0005459//UDP-galactose transmembrane…	GO:0006457//protein folding;GO:0009408//response to heat;GO:0009553//embryo sac development;GO:0009555//pollen development;GO:0009627//systemic acquired resistance;GO:0009644//response to high light intensity;GO:0015786//UDP-glucose transport;GO:0030968//endoplasmic reticulum unfolded protein response;GO:0042542//response to hydrogen peroxide;GO:0072334//UDP-galactose transmembrane transport;GO:0…	gi|225425760|ref|XP_002277178.1|/1.32859E-120/PREDICTED: solute carrier family 35 member B1 [Vitis vinifera]
VIT_204s0008g05300	1364	94.1438	522.626	2.46509	K248;K15280	solute carrier family 35 (Transporters)	GO:0005768//endosome;GO:0005794//Golgi apparatus;GO:0005802//trans-Golgi network;GO:0005886//plasma membrane;GO:0016021//integral component of membrane	GO:0008514//organic anion transmembrane transporter activity	GO:0006863//purine nucleobase transport;GO:0010584//pollen exine formation;GO:0015711//organic anion transport	gi|225430255|ref|XP_002285065.1|/0.0/PREDICTED: probable sugar phosphate/phosphate translocator At4g32390 [Vitis vinifera]
VIT_208s0007g01690	1504	78.5101	280.11	1.8269	K15285;K15283	solute carrier family 35 (Transporters)	GO:0005783//endoplasmic reticulum;GO:0005794//Golgi apparatus;GO:0005840//ribosome;GO:0005886//plasma membrane;GO:0016021//integral component of membrane	GO:0003735//structural constituent of ribosome;GO:0008514//organic anion transmembrane transporter activity	GO:0006397//mRNA processing;GO:0006412//translation;GO:0006863//purine nucleobase transport;GO:0015711//organic anion transport;GO:0016132//brassinosteroid biosynthetic process;GO:0042254//ribosome biogenesis	gi|225440588|ref|XP_002277359.1|/4.05408E-166/PREDICTED: probable sugar phosphate/phosphate translocator At3g11320 [Vitis vinifera]
VIT_210s0116g00760	2264	71.1546	253.816	1.82577	K15283	solute carrier family 35 (Transporters)	GO:0005774//vacuolar membrane;GO:0005886//plasma membrane;GO:0009507//chloroplast;GO:0016021//integral component of membrane	GO:0005315//inorganic phosphate transmembrane transporter activity;GO:0015120//phosphoglycerate transmembrane transporter activity;GO:0015152//glucose-6-phosphate transmembrane transporter activity;GO:0015297//antiporter activity;GO:0071917//triose-phosphate transmembrane transporter activity	GO:0006817//phosphate ion transport;GO:0007033//vacuole organization;GO:0007276//gamete generation;GO:0009553//embryo sac development;GO:0009624//response to nematode;GO:0009643//photosynthetic acclimation;GO:0009744//response to sucrose;GO:0009749//response to glucose;GO:0010109//regulation of photosynthesis;GO:0010152//pollen maturation;GO:0015713//phosphoglycerate transport;GO:0015714//phospho…	gi|225444357|ref|XP_002266056.1|/0.0/PREDICTED: glucose-6-phosphate/phosphate translocator 2, chloroplastic [Vitis vinifera]
VIT_205s0124g00560	2283	99.4343	333.764	1.74073	K15272;K15273	solute carrier family 35 (Transporters)	GO:0000139//Golgi membrane;GO:0009507//chloroplast;GO:0016021//integral component of membrane	GO:0005338//nucleotide-sugar transmembrane transporter activity;GO:0005351//sugar:proton symporter activity	GO:0008643//carbohydrate transport;GO:0015780//nucleotide-sugar transport;GO:0055085//transmembrane transport	gi|359478080|ref|XP_003632066.1|/0.0/PREDICTED: probable UDP-sugar transporter protein SLC35A5-like [Vitis vinifera]
VIT_218s0072g00080	1153	194.298	535.246	1.45901	K15285	solute carrier family 35 (Transporters)	GO:0000139//Golgi membrane;GO:0005886//plasma membrane;GO:0016021//integral component of membrane	GO:0003676//nucleic acid binding;GO:0005338//nucleotide-sugar transmembrane transporter activity;GO:0046983//protein dimerization activity	GO:0006863//purine nucleobase transport;GO:0015780//nucleotide-sugar transport	gi|359493159|ref|XP_003634527.1|/7.44706E-175/PREDICTED: UDP-galactose transporter 2-like [Vitis vinifera]
VIT_213s0019g03270	2060	106.842	251.266	1.22895	K15285;K15283	solute carrier family 35 (Transporters)	GO:0005783//endoplasmic reticulum;GO:0005794//Golgi apparatus;GO:0005840//ribosome;GO:0005886//plasma membrane;GO:0016021//integral component of membrane	GO:0003735//structural constituent of ribosome;GO:0008514//organic anion transmembrane transporter activity	GO:0006397//mRNA processing;GO:0006412//translation;GO:0006863//purine nucleobase transport;GO:0015711//organic anion transport;GO:0016132//brassinosteroid biosynthetic process;GO:0042254//ribosome biogenesis	gi|225449232|ref|XP_002279987.1|/1.08262E-173/PREDICTED: probable sugar phosphate/phosphate translocator At3g11320 [Vitis vinifera]
VIT_218s0001g02020	2549.13	518.687	1309.03	1.33452	K14209;K14209	solute carrier family 36 (Transporters)	GO:0005887//integral component of plasma membrane;GO:0005887//integral component of plasma membrane	GO:0015172//acidic amino acid transmembrane transporter activity;GO:0015174//basic amino acid transmembrane transporter activity;GO:0015175//neutral amino acid transmembrane transporter activity;GO:0015399//primary active transmembrane transporter activity;GO:0015172//acidic amino acid transmembrane transporter activity;GO:0015174//basic amino acid transmembrane transporter activity;GO:0015175//n…	GO:0006612//protein targeting to membrane;GO:0006833//water transport;GO:0006862//nucleotide transport;GO:0006888//ER to Golgi vesicle-mediated transport;GO:0009651//response to salt stress;GO:0009750//response to fructose;GO:0009963//positive regulation of flavonoid biosynthetic process;GO:0010363//regulation of plant-type hypersensitive response;GO:0015696//ammonium transport;GO:0015800//acidic…	gi|359492379|ref|XP_003634405.1|/0.0/PREDICTED: amino acid permease 2 [Vitis vinifera]
VIT_206s0004g01110	1764.82	172.433	651.472	1.91767	K14709;K14709;K14709	solute carrier family 39 (zinc transporter), member 1/2/3 (Transporters )	GO:0005774//vacuolar membrane;GO:0016021//integral component of membrane;GO:0005774//vacuolar membrane;GO:0016021//integral component of membrane;GO:0005774//vacuolar membrane;GO:0016021//integral component of membrane	GO:0008324//cation transmembrane transporter activity;GO:0008324//cation transmembrane transporter activity;GO:0008324//cation transmembrane transporter activity	GO:0006812//cation transport;GO:0055085//transmembrane transport;GO:0006812//cation transport;GO:0055085//transmembrane transport;GO:0006812//cation transport;GO:0055085//transmembrane transport	gi|225435642|ref|XP_002285662.1|/2.3951E-179/PREDICTED: metal tolerance protein 4 [Vitis vinifera]
VIT_217s0000g00820	1489	55.5271	1.60587	-4.65722	K15382	solute carrier family 50 (sugar transporter) (Transporters)	GO:0005887//integral component of plasma membrane;GO:0016023//cytoplasmic, membrane-bounded vesicle	GO:0008515//sucrose transmembrane transporter activity	GO:0010150//leaf senescence;GO:0015770//sucrose transport;GO:0070838//divalent metal ion transport;GO:0071215//cellular response to abscisic acid stimulus;GO:0071446//cellular response to salicylic acid stimulus;GO:0071470//cellular response to osmotic stress	gi|225456418|ref|XP_002280599.1|/2.01485E-144/PREDICTED: bidirectional sugar transporter SWEET14-like [Vitis vinifera]
VIT_18s0001g08210	1662	520.23	1430.14	1.4589	k15378	sucrose transporter-like	GO:			gi|100232844|ref|NM_001281137.1|/0.0/PREDICTED: sucrose transporter-like 1 (VVSUC11 or VvSUT1) [Vitis vinifera]
VIT_203s0038g03940	3055.77	433.292	1124.95	1.37518	K08150;K08150;K08150;K08150;K08150	MFS transporter, SP family, solute carrier family 2 (myo-inositol transporter), member 13 (Transporters)	GO:0009705//plant-type vacuole membrane;GO:0016021//integral component of membrane;GO:0005886//plasma membrane;GO:0009705//plant-type vacuole membrane;GO:0016021//integral component of membrane;GO:0005886//plasma membrane;GO:0009705//plant-type vacuole membrane;GO:0016021//integral component of membrane;GO:0005886//plasma membrane;GO:0009705//plant-type vacuole membrane;GO:0016021//integral compo…	GO:0022891//substrate-specific transmembrane transporter activity;GO:0032440//2-alkenal reductase [NAD(P)] activity;GO:0022891//substrate-specific transmembrane transporter activity;GO:0032440//2-alkenal reductase [NAD(P)] activity;GO:0022891//substrate-specific transmembrane transporter activity;GO:0032440//2-alkenal reductase [NAD(P)] activity;GO:0022891//substrate-specific transmembrane transp…	GO:0008643//carbohydrate transport;GO:0009624//response to nematode;GO:0055085//transmembrane transport;GO:0055114//oxidation-reduction process;GO:0008643//carbohydrate transport;GO:0009624//response to nematode;GO:0055085//transmembrane transport;GO:0055114//oxidation-reduction process;GO:0008643//carbohydrate transport;GO:0009624//response to nematode;GO:0055085//transmembrane transport;GO:0055…	gi|401063425|gb|AFP89954.1|/0.0/tonoplastic transporter 2 [Vitis vinifera]
VIT_219s0027g01890	2116.53	73.063	203.451	1.47747	K15015;K15015;K15015;K15015;K15015;K15015;K15015;K15015	ko04721 Synaptic vesicle cycle (Nervous system)	GO:0005886//vacuolar membrane;GO:0016021//integral component of membrane;GO:0005886//plasma membrane;GO:0016021//integral component of membrane;GO:0005886//plasma membrane;GO:0016021//integral component of membrane;GO:0005886//plasma membrane;GO:0016021//integral component of membrane;GO:0005886//plasma membrane;GO:0016021//integral component of membrane;GO:0005886//plasma membrane;GO:0016021//in…	-	-	gi|225465048|ref|XP_002265140.1|/0.0/PREDICTED: vacuolar amino acid transporter 1 [Vitis vinifera]
VIT_217s0000g02970	1889	32.2055	133.686	2.0534	K03327	Transporters Solute Carrier Family	GO:0005886//vacuolar membrane	GO:0015238//drug transmembrane transporter activity;GO:0015297//antiporter activity	GO:0006855//drug transmembrane transport;GO:0009624//response to nematode	gi|225456065|ref|XP_002280423.1|/0.0/PREDICTED: MATE efflux family protein 6 isoform 2 [Vitis vinifera]
VIT_16s0050g00930	1482	127.443	806.151	2.6612	K03327	Transporters Solute Carrier Family	GO:0005886//vacuolar membrane	GO:0015238//drug transmembrane transporter activity;GO:0015297//antiporter activity	GO:0006855//drug transmembrane transport;GO:0009624//response to nematode	gi|100268149|ref|NM_001303078.1|/0.0/PREDICTED: MATE efflux family protein 3 [Vitis vinifera]
VIT_216s0039g01110	2771	2.70843	16.3465	2.35002	K10775	ko00360 Phenylalanine metabolism (Amino acid metabolism)	GO:0005737//cytoplasm	GO:0045548//phenylalanine ammonia-lyase activity	GO:0006559//L-phenylalanine catabolic process;GO:0006570//tyrosine metabolic process;GO:0006979//response to oxidative stress;GO:0009555//pollen development;GO:0009800//cinnamic acid biosynthetic process;GO:0009819//drought recovery;GO:0009821//alkaloid biosynthetic process;GO:0010224//response to UV-B;GO:0046244//salicylic acid catabolic process;GO:0046274//lignin catabolic process;GO:0080167//r…	gi|371534665|gb|AEX32784.1|/0.0/phenylalanine ammonia-lyase [Vitis vinifera]
VIT_216s0039g01100	2246	24.9727	92.403	1.86188	K10775	ko00360 Phenylalanine metabolism (Amino acid metabolism)	GO:0005737//cytoplasm	GO:0045548//phenylalanine ammonia-lyase activity	GO:0006559//L-phenylalanine catabolic process;GO:0006570//tyrosine metabolic process;GO:0006979//response to oxidative stress;GO:0009555//pollen development;GO:0009800//cinnamic acid biosynthetic process;GO:0009819//drought recovery;GO:0009821//alkaloid biosynthetic process;GO:0010224//response to UV-B;GO:0046244//salicylic acid catabolic process;GO:0046274//lignin catabolic process;GO:0080167//r…	gi|225454649|ref|XP_002267953.1|/0.0/PREDICTED: phenylalanine ammonia-lyase [Vitis vinifera]
VIT_216s0039g01120	2464	18.9742	49.2931	1.34902	K10775	ko00360 Phenylalanine metabolism (Amino acid metabolism)	GO:0005737//cytoplasm	GO:0045548//phenylalanine ammonia-lyase activity	GO:0006559//L-phenylalanine catabolic process;GO:0006570//tyrosine metabolic process;GO:0006979//response to oxidative stress;GO:0009555//pollen development;GO:0009800//cinnamic acid biosynthetic process;GO:0009819//drought recovery;GO:0009821//alkaloid biosynthetic process;GO:0010224//response to UV-B;GO:0046244//salicylic acid catabolic process;GO:0046274//lignin catabolic process;GO:0080167//r…	gi|359489849|ref|XP_003633985.1|/0.0/PREDICTED: phenylalanine ammonia-lyase-like [Vitis vinifera]
VIT_200s0615g00030	1377	256.123	1797.42	2.80804	K00083	ko00940 Phenylpropanoid biosynthesis (Biosynthesis of other secondary metabolites)	-	GO:0000166//nucleotide binding;GO:0008270//zinc ion binding;GO:0018456//aryl-alcohol dehydrogenase (NAD+) activity;GO:0045551//cinnamyl-alcohol dehydrogenase activity	GO:0006558//L-phenylalanine metabolic process;GO:0006570//tyrosine metabolic process;GO:0009617//response to bacterium;GO:0009626//plant-type hypersensitive response;GO:0009805//coumarin biosynthetic process;GO:0009809//lignin biosynthetic process;GO:0009811;GO:0018879//biphenyl metabolic process;GO:0019384;GO:0042184;GO:0042203;GO:0055114//oxidation-reduction process	gi|359497141|ref|XP_003635436.1|/0.0/PREDICTED: probable mannitol dehydrogenase-like isoform 2 [Vitis vinifera]
VIT_200s0615g00020	1139	36.5748	122.953	1.73221	K00083	ko00940 Phenylpropanoid biosynthesis (Biosynthesis of other secondary metabolites)	-	GO:0000166//nucleotide binding;GO:0008270//zinc ion binding;GO:0018456//aryl-alcohol dehydrogenase (NAD+) activity;GO:0045551//cinnamyl-alcohol dehydrogenase activity	GO:0006558//L-phenylalanine metabolic process;GO:0006570//tyrosine metabolic process;GO:0009617//response to bacterium;GO:0009626//plant-type hypersensitive response;GO:0009805//coumarin biosynthetic process;GO:0009809//lignin biosynthetic process;GO:0009811;GO:0018879//biphenyl metabolic process;GO:0019384;GO:0042184;GO:0042203;GO:0055114//oxidation-reduction process	gi|359497139|ref|XP_003635435.1|/0.0/PREDICTED: probable mannitol dehydrogenase-like [Vitis vinifera]
VIT_200s0371g00100	1524.65	361.873	35.1454	-3.34134	K00083;K00083	ko00940 Phenylpropanoid biosynthesis (Biosynthesis of other secondary metabolites)	-	GO:0000166//nucleotide binding;GO:0008270//zinc ion binding;GO:0018456//aryl-alcohol dehydrogenase (NAD+) activity;GO:0045551//cinnamyl-alcohol dehydrogenase activity;GO:0000166//nucleotide binding;GO:0008270//zinc ion binding;GO:0018456//aryl-alcohol dehydrogenase (NAD+) activity;GO:0045551//cinnamyl-alcohol dehydrogenase activity	GO:0006558//L-phenylalanine metabolic process;GO:0006570//tyrosine metabolic process;GO:0009617//response to bacterium;GO:0009626//plant-type hypersensitive response;GO:0009805//coumarin biosynthetic process;GO:0009809//lignin biosynthetic process;GO:0009811;GO:0018879//biphenyl metabolic process;GO:0019384;GO:0042184;GO:0042203;GO:0055114//oxidation-reduction process;GO:0006558//L-phenylalanine …	gi|359496611|ref|XP_003635280.1|/8.40596E-176/PREDICTED: probable mannitol dehydrogenase-like [Vitis vinifera]
VIT_214s0066g01850	1202	307.138	1254.74	2.02824	K00430	ko00940 Phenylpropanoid biosynthesis (Biosynthesis of other secondary metabolites)	GO:0005576//extracellular region;GO:0005829//cytosol;GO:0009505//plant-type cell wall	GO:0004601//peroxidase activity;GO:0005515//protein binding;GO:0020037//heme binding;GO:0046872//metal ion binding	GO:0006979//response to oxidative stress;GO:0016126//sterol biosynthetic process;GO:0055114//oxidation-reduction process	gi|225452562|ref|XP_002280547.1|/0.0/PREDICTED: peroxidase 31-like [Vitis vinifera]
VIT_212s0035g02070	1237	436.922	165.513	-1.39708	K09753	ko00940 Phenylpropanoid biosynthesis (Biosynthesis of other secondary metabolites)	GO:0005829//cytosol;GO:0005886//plasma membrane	GO:0000166//nucleotide binding;GO:0016621//cinnamoyl-CoA reductase activity;GO:0045552//dihydrokaempferol 4-reductase activity;GO:0050662//coenzyme binding	GO:0009805//coumarin biosynthetic process;GO:0009809//lignin biosynthetic process;GO:0009811;GO:0009813//flavonoid biosynthetic process;GO:0019761//glucosinolate biosynthetic process;GO:0055114//oxidation-reduction process	gi|225465312|ref|XP_002269382.1|/0.0/PREDICTED: bifunctional dihydroflavonol 4-reductase/flavanone 4-reductase [Vitis vinifera]
VIT_213s0067g00620	1133	124.935	41.4864	-1.57623	K09753	ko00940 Phenylpropanoid biosynthesis (Biosynthesis of other secondary metabolites)	GO:0005886//plasma membrane	GO:0000166//nucleotide binding;GO:0003723//RNA binding;GO:0003964//RNA-directed DNA polymerase activity;GO:0050662//coenzyme binding	GO:0006278//RNA-dependent DNA replication	gi|359494923|ref|XP_003634871.1|/0.0/PREDICTED: LOW QUALITY PROTEIN: bifunctional dihydroflavonol 4-reductase/flavanone 4-reductase-like [Vitis vinifera]
VIT_216s0022g01970	1560	188.645	555.47	1.55804	K12356	ko00940 Phenylpropanoid biosynthesis (Biosynthesis of other secondary metabolites)	-	GO:0047209//coniferyl-alcohol glucosyltransferase activity;GO:0047213//anthocyanidin 3-O-glucosyltransferase activity	GO:0009718//anthocyanin-containing compound biosynthetic process;GO:0009805//coumarin biosynthetic process;GO:0009809//lignin biosynthetic process;GO:0009811	gi|225455580|ref|XP_002269179.1|/0.0/PREDICTED: anthocyanidin 3-O-glucosyltransferase 5-like [Vitis vinifera]
VIT_207s0191g00050	1797	39.284	100.397	1.35371	K00430	ko00940 Phenylpropanoid biosynthesis (Biosynthesis of other secondary metabolites)	GO:0005576//extracellular region;GO:0005829//cytosol	GO:0004601//peroxidase activity;GO:0020037//heme binding;GO:0046872//metal ion binding	GO:0006979//response to oxidative stress;GO:0009855//determination of bilateral symmetry;GO:0009944//polarity specification of adaxial/abaxial axis;GO:0010014//meristem initiation;GO:0010075//regulation of meristem growth;GO:0055114//oxidation-reduction process	gi|225468186|ref|XP_002271083.1|/0.0/PREDICTED: peroxidase 17 [Vitis vinifera]
VIT_216s0050g00830	1807	113.673	25.2638	-2.14265	K13065	ko00940 Phenylpropanoid biosynthesis (Biosynthesis of other secondary metabolites)	GO:0005737//cytoplasm	GO:0047672	GO:0009793//embryo development ending in seed dormancy;GO:0010090//trichome morphogenesis;GO:0010143//cutin biosynthetic process;GO:0048730//epidermis morphogenesis;GO:0051179//localization	gi|302143821|emb|CBI22682.3|/0.0/unnamed protein product [Vitis vinifera]
VIT_213s0064g00290	772	19.8691	123.545	2.63644	K09753	ko00940 Phenylpropanoid biosynthesis (Biosynthesis of other secondary metabolites)	GO:0005886//plasma membrane	GO:0000166//nucleotide binding;GO:0003676//nucleic acid binding;GO:0003824//catalytic activity;GO:0008270//zinc ion binding;GO:0050662//coenzyme binding	GO:0015074//DNA integration	gi|359487096|ref|XP_003633516.1|/5.76054E-110/PREDICTED: bifunctional dihydroflavonol 4-reductase/flavanone 4-reductase-like [Vitis vinifera]
VIT_206s0004g07770	1920	998.681	161.251	-2.62608	K00430	ko00941 Phenylpropanoid biosynthesis ( Biosynthesis of other secondary metabolites)	GO:0005618//cell wall;GO:0005794//Golgi apparatus;GO:0005829//cytosol;GO:0016023//cytoplasmic, membrane-bounded vesicle;GO:0048046//apoplast	GO:0004601//peroxidase activity;GO:0005515//protein binding;GO:0020037//heme binding;GO:0046872//metal ion binding	GO:0042744//hydrogen peroxide catabolic process;GO:0055114//oxidation-reduction process	gi|225434381|ref|XP_002269918.1|/3.17986E-174/PREDICTED: peroxidase 4 [Vitis vinifera]
VIT_210s0116g01780	3022	4134.32	1094.33	-1.917	K00430	ko00941 Phenylpropanoid biosynthesis (Biosynthesis of other secondary metabolites)	-	GO:0004601//peroxidase activity;GO:0020037//heme binding;GO:0046872//metal ion binding	GO:0006979//response to oxidative stress;GO:0055114//oxidation-reduction process	gi|225444515|ref|XP_002274769.1|/1.06761E-180/PREDICTED: peroxidase 42 isoform 1 [Vitis vinifera]
VIT_208s0058g00970	1537.96	160.78	34.8566	-2.18572	K00430;K00430;K00430	ko00942 Phenylpropanoid biosynthesis ( Biosynthesis of other secondary metabolites)	GO:0005576//extracellular region;GO:0005576//extracellular region;GO:0005576//extracellular region	GO:0004601//peroxidase activity;GO:0020037//heme binding;GO:0046872//metal ion binding;GO:0004601//peroxidase activity;GO:0020037//heme binding;GO:0046872//metal ion binding;GO:0004601//peroxidase activity;GO:0020037//heme binding;GO:0046872//metal ion binding	GO:0042744//hydrogen peroxide catabolic process;GO:0055114//oxidation-reduction process;GO:0042744//hydrogen peroxide catabolic process;GO:0055114//oxidation-reduction process;GO:0042744//hydrogen peroxide catabolic process;GO:0055114//oxidation-reduction process	gi|359481249|ref|XP_002266365.2|/1.34176E-147/PREDICTED: cationic peroxidase 1-like [Vitis vinifera]
VIT_218s0001g06850	1383.96	388.137	27.0326	-3.81342	K00430;K00430;K00430;K00430;K00430;K00430	ko00942 Phenylpropanoid biosynthesis (Biosynthesis of other secondary metabolites)	GO:0005576//extracellular region;GO:0005576//extracellular region;GO:0005576//extracellular region;GO:0005576//extracellular region;GO:0005576//extracellular region;GO:0005576//extracellular region;GO:0016023//cytoplasmic, membrane-bounded vesicle	GO:0004601//peroxidase activity;GO:0020037//heme binding;GO:0046872//metal ion binding;GO:0004601//peroxidase activity;GO:0020037//heme binding;GO:0046872//metal ion binding;GO:0004601//peroxidase activity;GO:0020037//heme binding;GO:0046872//metal ion binding;GO:0004601//peroxidase activity;GO:0020037//heme binding;GO:0046872//metal ion binding;GO:0004601//peroxidase activity;GO:0020037//heme bi…	GO:0042744//hydrogen peroxide catabolic process;GO:0055114//oxidation-reduction process;GO:0042744//hydrogen peroxide catabolic process;GO:0055114//oxidation-reduction process;GO:0042744//hydrogen peroxide catabolic process;GO:0055114//oxidation-reduction process;GO:0042744//hydrogen peroxide catabolic process;GO:0055114//oxidation-reduction process;GO:0042744//hydrogen peroxide catabolic process…	gi|225459178|ref|XP_002284007.1|/1.84637E-167/PREDICTED: cationic peroxidase 1-like [Vitis vinifera]
VIT_200s1682g00020	1850	151.847	330.139	1.11728	K05280;K13261;K14985	ko00941 Flavonoid biosynthesis (Biosynthesis of other secondary metabolites)	GO:0005618//cell wall;GO:0005739//mitochondrion;GO:0005886//plasma membrane	GO:0005506//iron ion binding;GO:0009055//electron carrier activity;GO:0020037//heme binding;GO:0033772	GO:0055114//oxidation-reduction process	gi|359497661|ref|XP_002263737.2|/0.0/PREDICTED: cytochrome P450 93A3-like, partial [Vitis vinifera]
VIT_202s0012g00450	1128	141.294	38.4827	-1.8597	K05278	ko00941 Flavonoid biosynthesis (Biosynthesis of other secondary metabolites)	-	GO:0016702//oxidoreductase activity, acting on single donors with incorporation of molecular oxygen, incorporation of two atoms of oxygen;GO:0045431//flavonol synthase activity;GO:0046872//metal ion binding;GO:0050474	GO:0009821//alkaloid biosynthetic process;GO:0051555//flavonol biosynthetic process;GO:0055114//oxidation-reduction process	gi|225427338|ref|XP_002279355.1|/0.0/PREDICTED: S-norcoclaurine synthase 1 [Vitis vinifera]
VIT_202s0025g01260	2054.65	327.521	76.7968	-2.08361	K08695;K08695;K08695;K08695;K13082;K08695;K08695	ko00941 Flavonoid biosynthesis (Biosynthesis of other secondary metabolites)	-	GO:0000166//nucleotide binding;GO:0003854//3-beta-hydroxy-delta5-steroid dehydrogenase activity;GO:0045552//dihydrokaempferol 4-reductase activity;GO:0050662//coenzyme binding;GO:0000166//nucleotide binding;GO:0003854//3-beta-hydroxy-delta5-steroid dehydrogenase activity;GO:0045552//dihydrokaempferol 4-reductase activity;GO:0050662//coenzyme binding;GO:0000166//nucleotide binding;GO:0003854//3-be…	GO:0006694//steroid biosynthetic process;GO:0008207//C21-steroid hormone metabolic process;GO:0008209//androgen metabolic process;GO:0008210//estrogen metabolic process;GO:0009813//flavonoid biosynthetic process;GO:0055114//oxidation-reduction process;GO:0006694//steroid biosynthetic process;GO:0008207//C21-steroid hormone metabolic process;GO:0008209//androgen metabolic process;GO:0008210//estro…	gi|297742316|emb|CBI34465.3|/5.49565E-94/unnamed protein product [Vitis vinifera]
VIT_205s0020g01310	2818.37	64.0311	6.01193	-3.28531	K05278;K05278;K05278;K05278	ko00941 Flavonoid biosynthesis (Biosynthesis of other secondary metabolites)	GO:0005737//cytoplasm;GO:0005737//cytoplasm;GO:0005737//cytoplasm;GO:0005737//cytoplasm	GO:0045431//flavonol synthase activity;GO:0005506//iron ion binding;GO:0045431//flavonol synthase activity;GO:0045431//flavonol synthase activity;GO:0045431//flavonol synthase activity	GO:0051555//flavonol biosynthetic process;GO:0055114//oxidation-reduction process;GO:0051555//flavonol biosynthetic process;GO:0055114//oxidation-reduction process;GO:0051555//flavonol biosynthetic process;GO:0055114//oxidation-reduction process;GO:0051555//flavonol biosynthetic process;GO:0055114//oxidation-reduction process	gi|225432270|ref|XP_002272119.1|/3.274E-155/PREDICTED: protein SRG1 [Vitis vinifera]
VIT_207s0129g00860	3309	78.3652	212.294	1.43063	K13260;K00517	ko00943 Isoflavonoid biosynthesis (Biosynthesis of other secondary metabolites)	GO:0005783//endoplasmic reticulum;GO:0005886//plasma membrane	GO:0004497//monooxygenase activity;GO:0005506//iron ion binding;GO:0009055//electron carrier activity;GO:0016705//oxidoreductase activity, acting on paired donors, with incorporation or reduction of molecular oxygen;GO:0020037//heme binding	GO:0002213//defense response to insect;GO:0009759//indole glucosinolate biosynthetic process;GO:0042742//defense response to bacterium;GO:0050832//defense response to fungus;GO:0052544//defense response by callose deposition in cell wall;GO:0055114//oxidation-reduction process;GO:0080167//response to karrikin	gi|147778583|emb|CAN60309.1|/0.0/hypothetical protein VITISV_015004 [Vitis vinifera]
VIT_215s0048g01010	1239	353.724	143.691	-1.29597	K13265	ko00943 Isoflavonoid biosynthesis (Biosynthesis of other secondary metabolites)	GO:0005737//cytoplasm	GO:0000166//nucleotide binding;GO:0045552//dihydrokaempferol 4-reductase activity;GO:0050662//coenzyme binding	GO:0009813//flavonoid biosynthetic process;GO:0010422//regulation of brassinosteroid biosynthetic process;GO:0055114//oxidation-reduction process	gi|225453889|ref|XP_002278819.1|/0.0/PREDICTED: dihydroflavonol-4-reductase isoform 1 [Vitis vinifera]
VIT_210s0003g00480	1869	97.5893	26.6623	-1.84792	K13262;K16040	ko00943 Isoflavonoid biosynthesis (Biosynthesis of other secondary metabolites)	-	GO:0046983//protein dimerization activity;GO:0050630	GO:0032259//methylation	gi|225443568|ref|XP_002278092.1|/0.0/PREDICTED: isoflavone-7-O-methyltransferase 9 isoform 1 [Vitis vinifera]
VIT_218s0041g00840	1510	53.836	6.77982	-2.87965	K13263;K08237;K12938	ko00943 Isoflavonoid biosynthesis (Biosynthesis of other secondary metabolites)	-	GO:0016758//transferase activity, transferring hexosyl groups	GO:0008152//metabolic process	gi|225460460|ref|XP_002272345.1|/0.0/PREDICTED: anthocyanidin 5,3-O-glucosyltransferase-like [Vitis vinifera]
VIT_212s0059g01790	1421	47.0001	14.9625	-1.61169	K05279;K16040;K13066;K13262	ko00944 Flavone and flavonol biosynthesis (Biosynthesis of other secondary metabolites)	-	GO:0046983//protein dimerization activity;GO:0050630	GO:0032259//methylation	gi|225447213|ref|XP_002277602.1|/0.0/PREDICTED: (RS)-norcoclaurine 6-O-methyltransferase [Vitis vinifera]
VIT_212s0034g00040	1648	112.39	825.84	2.87735	K08237			GO:0016020//membrane	GO:0010294//abscisic acid glucosyltransferase activity;GO:0080043//quercetin 3-O-glucosyltransferase activity;GO:0080046//quercetin 4'-O-glucosyltransferase activity	GO:0008152//metabolic process;GO:0009651//response to salt stress;GO:0009737//response to abscisic acid	gi|359486131|ref|XP_002265548.2|/0.0/PREDICTED: UDP-glucose flavonoid 3-O-glucosyltransferase 6-like [Vitis vinifera]
VIT_202s0033g00390	799	79.3708	315.064	1.98059	K09422	myb proto-oncogene protein, plant (Transcription factors)	GO:0000785//chromatin	GO:0003677//DNA binding;GO:0003682//chromatin binding	-	gi|47232544|dbj|BAD18978.1|/4.89344E-146/myb-relared transcription factor VvMYBA2 [Vitis vinifera]
VIT_202s0033g00410	1194	93.8384	278.568	1.56349	K09422;K09422	myb proto-oncogene protein, plant (Transcription factors)	GO:0000785//chromatin;GO:0000785//chromatin	GO:0003677//DNA binding;GO:0003682//chromatin binding;GO:0003677//DNA binding;GO:0003682//chromatin binding	-	gi|47232542|dbj|BAD18977.1|/5.74942E-142/myb-related transcription factor VvMYBA1 [Vitis vinifera]
VIT_202s0033g00180	1853	174.681	629.812	1.84651	K13496;K13495	UDP-glucosyl transferase 73C (Transferases)	-	GO:0003676//nucleic acid binding;GO:0008270//zinc ion binding;GO:0047213//anthocyanidin 3-O-glucosyltransferase activity	GO:0009813//flavonoid biosynthetic process	gi|359474650|ref|XP_003631503.1|/0.0/PREDICTED: anthocyanidin 3-O-glucosyltransferase [Vitis vinifera]
VIT_202s0033g00130	1658	164.53	581.599	1.81779	K13496	UDP-glucosyl transferase 73C (Transferases)	-	GO:0003676//nucleic acid binding;GO:0008270//zinc ion binding;GO:0047213//anthocyanidin 3-O-glucosyltransferase activity	GO:0009813//flavonoid biosynthetic process;GO:0044281//small molecule metabolic process;GO:0050896//response to stimulus	gi|359474650|ref|XP_003631503.1|/0.0/PREDICTED: anthocyanidin 3-O-glucosyltransferase [Vitis vinifera]
VIT_217s0000g04750	1693	137.251	366.275	1.41206	K13496	UDP-glucosyl transferase 73C (Transferases)	-	GO:0047213//anthocyanidin 3-O-glucosyltransferase activity;GO:0080043//quercetin 3-O-glucosyltransferase activity;GO:0080044//quercetin 7-O-glucosyltransferase activity;GO:0080046//quercetin 4'-O-glucosyltransferase activity	GO:0009062//fatty acid catabolic process;GO:0009813//flavonoid biosynthetic process	gi|225455734|ref|XP_002268089.1|/0.0/PREDICTED: anthocyanidin 3-O-glucosyltransferase [Vitis vinifera]
VIT_214s0006g02145	1983	30.0096	6.63015	-2.07895	K13496	UDP-glucosyl transferase 73C (Transferases)	-	GO:0047213//anthocyanidin 3-O-glucosyltransferase activity;GO:0080043//quercetin 3-O-glucosyltransferase activity;GO:0080044//quercetin 7-O-glucosyltransferase activity;GO:0080046//quercetin 4'-O-glucosyltransferase activity	GO:0009813//flavonoid biosynthetic process	gi|359488137|ref|XP_002268341.2|/0.0/PREDICTED: anthocyanidin 3-O-glucosyltransferase [Vitis vinifera]
VIT_219s0027g01790	1943	128.339	51.991	-1.29349	K00818	ko00220 Arginine biosynthesis (Amino acid metabolism)	GO:0005667//transcription factor complex;GO:0005739//mitochondrion;GO:0009570//chloroplast stroma	GO:0003700//transcription factor activity, sequence-specific DNA binding;GO:0003992//N2-acetyl-L-ornithine:2-oxoglutarate 5-aminotransferase activity;GO:0005507//copper ion binding;GO:0030170//pyridoxal phosphate binding;GO:0043565//sequence-specific DNA binding	GO:0006355//regulation of transcription, DNA-templated;GO:0006526//arginine biosynthetic process;GO:0009414//response to water deprivation;GO:0009873//ethylene-activated signaling pathway;GO:0010143//cutin biosynthetic process;GO:0010166//wax metabolic process;GO:0042742//defense response to bacterium;GO:0044419//interspecies interaction between organisms;GO:0048481//ovule development;GO:0080022/…	gi|225465060|ref|XP_002268013.1|/0.0/PREDICTED: acetylornithine aminotransferase, mitochondrial [Vitis vinifera]
VIT_205s0020g02480	2289	297.792	69.837	-2.0825	K01915	ko00220 Arginine biosynthesis (Amino acid metabolism)	GO:0005739//mitochondrion;GO:0009535//chloroplast thylakoid membrane;GO:0009570//chloroplast stroma;GO:0009941//chloroplast envelope;GO:0022626//cytosolic ribosome;GO:0048046//apoplast	GO:0004356//glutamate-ammonia ligase activity;GO:0005524//ATP binding	GO:0006542//glutamine biosynthetic process;GO:0009252//peptidoglycan biosynthetic process;GO:0009399//nitrogen fixation;GO:0009651//response to salt stress;GO:0046686//response to cadmium ion	gi|225432496|ref|XP_002279497.1|/0.0/PREDICTED: glutamine synthetase leaf isozyme, chloroplastic [Vitis vinifera]
VIT_216s0098g00290	6879.68	1635.74	4619.76	1.49752	K00264;K00264;K00264;K00264;K00264;K00264;K00264;K00264	ko00250 Alanine, aspartate and glutamate metabolism (Amino acid metabolism)	GO:0005739//mitochondrion;GO:0005829//cytosol;GO:0005886//plasma membrane;GO:0009501//amyloplast;GO:0009570//chloroplast stroma;GO:0009941//chloroplast envelope;GO:0016021//integral component of membrane;GO:0005739//mitochondrion;GO:0005829//cytosol;GO:0005886//plasma membrane;GO:0009501//amyloplast;GO:0009570//chloroplast stroma;GO:0009941//chloroplast envelope;GO:0016021//integral component of …	GO:0005351//sugar:proton symporter activity;GO:0005506//iron ion binding;GO:0010181//FMN binding;GO:0016040//glutamate synthase (NADH) activity;GO:0050660//flavin adenine dinucleotide binding;GO:0051538//3 iron, 4 sulfur cluster binding;GO:0005351//sugar:proton symporter activity;GO:0005506//iron ion binding;GO:0010181//FMN binding;GO:0016040//glutamate synthase (NADH) activity;GO:0050660//flavin…	GO:0006094//gluconeogenesis;GO:0006096//glycolytic process;GO:0008643//carbohydrate transport;GO:0009651//response to salt stress;GO:0019676//ammonia assimilation cycle;GO:0042128//nitrate assimilation;GO:0046686//response to cadmium ion;GO:0048589//developmental growth;GO:0055085//transmembrane transport;GO:0055114//oxidation-reduction process;GO:0097054//L-glutamate biosynthetic process;GO:0006…	gi|359490794|ref|XP_002267865.2|/0.0/PREDICTED: glutamate synthase 1 [NADH], chloroplastic-like [Vitis vinifera]
VIT_205s0020g02770	1738.64	2676.12	734.009	-1.86539	K01953;K01953	ko00250 Alanine, aspartate and glutamate metabolism (Amino acid metabolism)	GO:0005737//cytoplasm;GO:0005886//plasma membrane;GO:0005737//cytoplasm;GO:0005886//plasma membrane;GO:0005737//cytoplasm;GO:0005886//plasma membrane	-	GO:0009733//response to auxin;GO:0010044//response to aluminum ion;GO:0009733//response to auxin;GO:0010044//response to aluminum ion;GO:0009733//response to auxin;GO:0010044//response to aluminum ion	gi|225432548|ref|XP_002280658.1|/3.1999E-129/PREDICTED: stem-specific protein TSJT1 [Vitis vinifera]
VIT_208s0007g04990	2472	545.59	5239.94	3.2622	K00789	ko00270 Cysteine and methionine metabolism ( Amino acid metabolism)	GO:0005737//cytoplasm	GO:0009055//electron carrier activity;GO:0015035//protein disulfide oxidoreductase activity	GO:0006662//glycerol ether metabolic process;GO:0022900//electron transport chain;GO:0045454//cell redox homeostasis	gi|359482259|ref|XP_002266281.2|/7.32831E-69/PREDICTED: thioredoxin-like 3-3-like [Vitis vinifera]
VIT_208s0007g05000	2648.83	552.795	5128.62	3.21231	K00789;K00789	ko00270 Cysteine and methionine metabolism ( Amino acid metabolism)	GO:0005737//cytoplasm;GO:0005886//plasma membrane;GO:0031361//integral component of thylakoid membrane;GO:0005737//cytoplasm;GO:0005886//plasma membrane;GO:0031361//integral component of thylakoid membrane	GO:0004478//methionine adenosyltransferase activity;GO:0005506//iron ion binding;GO:0005507//copper ion binding;GO:0005524//ATP binding;GO:0009055//electron carrier activity;GO:0020037//heme binding;GO:0004478//methionine adenosyltransferase activity;GO:0005506//iron ion binding;GO:0005507//copper ion binding;GO:0005524//ATP binding;GO:0009055//electron carrier activity;GO:0020037//heme binding	GO:0006555//methionine metabolic process;GO:0006556//S-adenosylmethionine biosynthetic process;GO:0006730//one-carbon metabolic process;GO:0015948;GO:0015979//photosynthesis;GO:0006555//methionine metabolic process;GO:0006556//S-adenosylmethionine biosynthetic process;GO:0006730//one-carbon metabolic process;GO:0015948;GO:0015979//photosynthesis	gi|225441193|ref|XP_002270100.1|/0.0/PREDICTED: S-adenosylmethionine synthase 3 isoform 2 [Vitis vinifera]
VIT_214s0060g00480	2205.5	5298.27	13636.5	1.36378	K00789;K00789;K00789;K00789	ko00270 Cysteine and methionine metabolism ( Amino acid metabolism)	GO:0005737//cytoplasm;GO:0005737//cytoplasm;GO:0005737//cytoplasm;GO:0005737//cytoplasm	GO:0004478//methionine adenosyltransferase activity;GO:0005524//ATP binding;GO:0046872//metal ion binding;GO:0004478//methionine adenosyltransferase activity;GO:0005524//ATP binding;GO:0046872//metal ion binding;GO:0004478//methionine adenosyltransferase activity;GO:0005524//ATP binding;GO:0046872//metal ion binding;GO:0004478//methionine adenosyltransferase activity;GO:0005524//ATP binding;GO:00…	GO:0006555//methionine metabolic process;GO:0006556//S-adenosylmethionine biosynthetic process;GO:0006730//one-carbon metabolic process;GO:0009651//response to salt stress;GO:0015948;GO:0006555//methionine metabolic process;GO:0006556//S-adenosylmethionine biosynthetic process;GO:0006730//one-carbon metabolic process;GO:0009651//response to salt stress;GO:0015948;GO:0006555//methionine metabolic …	gi|359487692|ref|XP_002280318.2|/0.0/PREDICTED: S-adenosylmethionine synthase 4, partial [Vitis vinifera]
VIT_202s0025g00360	2238	32.0504	91.8467	1.50097	K01762;K01762;K01762;K01762	ko00270 Cysteine and methionine metabolism (Amino acid metabolism)	-	GO:0016847//1-aminocyclopropane-1-carboxylate synthase activity;GO:0030170//pyridoxal phosphate binding;GO:0016847//1-aminocyclopropane-1-carboxylate synthase activity;GO:0030170//pyridoxal phosphate binding;GO:0016847//1-aminocyclopropane-1-carboxylate synthase activity;GO:0030170//pyridoxal phosphate binding;GO:0016847//1-aminocyclopropane-1-carboxylate synthase activity;GO:0030170//pyridoxal p…	GO:0042218;GO:0042218;GO:0042218;GO:0042218	gi|359474171|ref|XP_002278489.2|/0.0/PREDICTED: 1-aminocyclopropane-1-carboxylate synthase-like [Vitis vinifera]
VIT_218s0001g14980	1522	140.609	42.4744	-1.71248	K00166	ko00280 Valine, leucine and isoleucine degradation ( Amino acid metabolism)	GO:0017086//3-methyl-2-oxobutanoate dehydrogenase (lipoamide) complex	GO:0003863//3-methyl-2-oxobutanoate dehydrogenase (2-methylpropanoyl-transferring) activity	GO:0006550//isoleucine catabolic process;GO:0006552//leucine catabolic process;GO:0006574//valine catabolic process;GO:0055114//oxidation-reduction process	gi|225457857|ref|XP_002268860.1|/0.0/PREDICTED: 2-oxoisovalerate dehydrogenase subunit alpha, mitochondrial [Vitis vinifera]
VIT_210s0003g02120	1445	11.6367	57.7719	2.25227	K01969;K10960;K00679;K01188;K17604	ko00280 Valine, leucine and isoleucine degradation (Amino acid metabolism)	GO:0005618//cell wall;GO:0005634//nucleus;GO:0009534//chloroplast thylakoid;GO:0048046//apoplast	-	GO:0000038//very long-chain fatty acid metabolic process;GO:0006833//water transport;GO:0009651//response to salt stress;GO:0009750//response to fructose;GO:0042335//cuticle development;GO:0042631//cellular response to water deprivation	gi|225462452|ref|XP_002266118.1|/0.0/PREDICTED: GDSL esterase/lipase At5g45670 [Vitis vinifera]
VIT_212s0057g01250	1663	155.506	68.458	-1.17642	K19199	ko00310 Lysine degradation (Amino acid metabolism)	GO:0005739//mitochondrion;GO:0009573//chloroplast ribulose bisphosphate carboxylase complex	GO:0005515//protein binding;GO:0030785//[ribulose-bisphosphate carboxylase]-lysine N-methyltransferase activity	GO:0000023//maltose metabolic process;GO:0009902//chloroplast relocation;GO:0010027//thylakoid membrane organization;GO:0019252//starch biosynthetic process;GO:0019288//isopentenyl diphosphate biosynthetic process, methylerythritol 4-phosphate pathway;GO:0032259//methylation;GO:0034660//ncRNA metabolic process	gi|225447500|ref|XP_002267469.1|/0.0/PREDICTED: ribulose-1,5 bisphosphate carboxylase/oxygenase large subunit N-methyltransferase, chloroplastic [Vitis vinifera]
VIT_216s0039g00740	1996.48	266.165	106.176	-1.32083	K11423;K11423;K11423;K11423;K11423;K11423;K11423;K11423;K11423;K11423	ko00310 Lysine degradation (Amino acid metabolism)	GO:0005634//nucleus;GO:0005783//endoplasmic reticulum;GO:0009506//plasmodesma;GO:0005634//nucleus;GO:0005783//endoplasmic reticulum;GO:0009506//plasmodesma;GO:0005634//nucleus;GO:0005783//endoplasmic reticulum;GO:0009506//plasmodesma;GO:0005634//nucleus;GO:0005783//endoplasmic reticulum;GO:0009506//plasmodesma;GO:0005634//nucleus;GO:0005783//endoplasmic reticulum;GO:0009506//plasmodesma;GO:000563…	GO:0005515//protein binding;GO:0018024//histone-lysine N-methyltransferase activity;GO:0005515//protein binding;GO:0018024//histone-lysine N-methyltransferase activity;GO:0005515//protein binding;GO:0018024//histone-lysine N-methyltransferase activity;GO:0005515//protein binding;GO:0008270//zinc ion binding;GO:0018024//histone-lysine N-methyltransferase activity;GO:0005515//protein binding;GO:001…	GO:0006554//lysine catabolic process;GO:0034968//histone lysine methylation;GO:0006554//lysine catabolic process;GO:0034968//histone lysine methylation;GO:0006554//lysine catabolic process;GO:0034968//histone lysine methylation;GO:0006554//lysine catabolic process;GO:0034968//histone lysine methylation;GO:0006554//lysine catabolic process;GO:0034968//histone lysine methylation;GO:0006554//lysine …	gi|359489946|ref|XP_002268035.2|/6.74468E-142/PREDICTED: histone-lysine N-methyltransferase ASHH3-like [Vitis vinifera]
VIT_200s0480g00040	1050	60.2507	256.434	2.07827	K00422	ko00350 Tyrosine metabolism (Amino acid metabolism)	GO:0009543//chloroplast thylakoid lumen	GO:0004097//catechol oxidase activity;GO:0004503//monophenol monooxygenase activity;GO:0046872//metal ion binding	GO:0006570//tyrosine metabolic process;GO:0006771//riboflavin metabolic process;GO:0009805//coumarin biosynthetic process;GO:0009809//lignin biosynthetic process;GO:0009811;GO:0009821//alkaloid biosynthetic process;GO:0046148//pigment biosynthetic process;GO:0055114//oxidation-reduction process	gi|359496906|ref|XP_002275842.2|/2.59403E-88/PREDICTED: LOW QUALITY PROTEIN: polyphenol oxidase, chloroplastic-like isoform 1 [Vitis vinifera]
VIT_208s0058g00590	956	123.491	44.1422	-1.47129	K07253	ko00350 Tyrosine metabolism (Amino acid metabolism)	GO:0005777//peroxisome;GO:0009507//chloroplast	-	GO:0006569//tryptophan catabolic process;GO:0006954//inflammatory response;GO:0009684//indoleacetic acid biosynthetic process;GO:0051707//response to other organism	gi|225439552|ref|XP_002264120.1|/8.15088E-58/PREDICTED: macrophage migration inhibitory factor homolog isoform 1 [Vitis vinifera]
VIT_207s0104g00410	976	549.013	243.052	-1.17353	K01061	ko00361 Chlorocyclohexane and chlorobenzene degradation (Xenobiotics biodegradation and metabolism)	GO:0005634//nucleus;GO:0005829//cytosol;GO:0005886//plasma membrane;GO:0048046//apoplast	GO:0008806//carboxymethylenebutenolidase activity	GO:0006096//glycolytic process;GO:0006833//water transport;GO:0006972//hyperosmotic response;GO:0007030//Golgi organization;GO:0009266//response to temperature stimulus;GO:0009651//response to salt stress;GO:0019261;GO:0046686//response to cadmium ion	gi|225436944|ref|XP_002275763.1|/1.12806E-133/PREDICTED: endo-1,3;1,4-beta-D-glucanase [Vitis vinifera]
VIT_200s0225g00230	1828	9.13078	309.685	4.99213	K16903	ko00380 Tryptophan metabolism (Amino acid metabolism)	GO:0005634//nucleus;GO:0005737//cytoplasm	GO:0004021//L-alanine:2-oxoglutarate aminotransferase activity;GO:0004838//L-tyrosine:2-oxoglutarate aminotransferase activity;GO:0030170//pyridoxal phosphate binding;GO:0047312//L-phenylalanine:pyruvate aminotransferase activity;GO:0047654;GO:0050048//L-leucine:2-oxoglutarate aminotransferase activity;GO:0050362//L-tryptophan:2-oxoglutarate aminotransferase activity;GO:0080097//L-tryptophan:pyru…	GO:0000162//tryptophan biosynthetic process;GO:0006103//2-oxoglutarate metabolic process;GO:0006522//alanine metabolic process;GO:0006531//aspartate metabolic process;GO:0006536//glutamate metabolic process;GO:0006550//isoleucine catabolic process;GO:0006552//leucine catabolic process;GO:0006571//tyrosine biosynthetic process;GO:0006574//valine catabolic process;GO:0009094//L-phenylalanine biosyn…	gi|225470601|ref|XP_002274547.1|/0.0/PREDICTED: tryptophan aminotransferase 1 [Vitis vinifera]
VIT_214s0066g00800	2528	454.987	1201.53	1.39976	K16903;K10896	ko00380 Tryptophan metabolism (Amino acid metabolism)	GO:0005634//nucleus;GO:0005829//cytosol;GO:0009536//plastid	-	-	gi|225452376|ref|XP_002275607.1|/0.0/PREDICTED: uncharacterized protein LOC100264681 [Vitis vinifera]
VIT_217s0000g07790	1894	416.05	117.13	-1.82318	K11820	ko00380 Tryptophan metabolism (Amino acid metabolism)	-	GO:0047215//indole-3-acetate beta-glucosyltransferase activity;GO:0047251//thiohydroximate beta-D-glucosyltransferase activity;GO:0052639//salicylic acid glucosyltransferase (ester-forming) activity;GO:0052640//salicylic acid glucosyltransferase (glucoside-forming) activity;GO:0052641//benzoic acid glucosyltransferase activity;GO:0080002//UDP-glucose:4-aminobenzoate acylglucosyltransferase activi…	GO:0009696//salicylic acid metabolic process;GO:0018874//benzoate metabolic process;GO:0019761//glucosinolate biosynthetic process;GO:0042742//defense response to bacterium;GO:0046482//para-aminobenzoic acid metabolic process;GO:0052544//defense response by callose deposition in cell wall	gi|225457128|ref|XP_002280305.1|/0.0/PREDICTED: UDP-glycosyltransferase 74B1 [Vitis vinifera]
VIT_218s0157g00170	2332	93.8318	23.2814	-1.98251	K16903;K14548	ko00380 Tryptophan metabolism (Amino acid metabolism)	-	GO:0030170//pyridoxal phosphate binding;GO:0047654	GO:0008152//metabolic process	gi|225470836|ref|XP_002266138.1|/0.0/PREDICTED: tryptophan aminotransferase-related protein 4 [Vitis vinifera]
VIT_218s0157g00090	1607	124.39	20.9391	-2.53571	K16903;K14548	ko00380 Tryptophan metabolism (Amino acid metabolism)	-	GO:0030170//pyridoxal phosphate binding;GO:0047654	GO:0008152//metabolic process	gi|225470828|ref|XP_002265873.1|/0.0/PREDICTED: tryptophan aminotransferase-related protein 4-like [Vitis vinifera]
VIT_206s0061g01300	1658	109.632	363.533	1.72374	K05359	ko00400 Phenylalanine, tyrosine and tryptophan biosynthesis ( Amino acid metabolism)	GO:0005829//cytosol;GO:0009507//chloroplast	GO:0004664//prephenate dehydratase activity;GO:0047769//arogenate dehydratase activity	GO:0000162//tryptophan biosynthetic process;GO:0006571//tyrosine biosynthetic process;GO:0009094//L-phenylalanine biosynthetic process;GO:0010048//vernalization response;GO:0010244//response to low fluence blue light stimulus by blue low-fluence system;GO:0043481//anthocyanin accumulation in tissues in response to UV light;GO:0048440//carpel development;GO:0080167//response to karrikin	gi|225436339|ref|XP_002268701.1|/0.0/PREDICTED: arogenate dehydratase/prephenate dehydratase 6, chloroplastic [Vitis vinifera]
VIT_200s1937g00010	1412	300.77	1186.37	1.9776	K00276	ko00260 Glycine, serine and threonine metabolism ( Amino acid metabolism)	GO:0005576//extracellular region;GO:0005768//endosome;GO:0005773//vacuole;GO:0005794//Golgi apparatus;GO:0005802//trans-Golgi network	GO:0005507//copper ion binding;GO:0008131//primary amine oxidase activity;GO:0048038//quinone binding	GO:0006809//nitric oxide biosynthetic process;GO:0009308//amine metabolic process;GO:0009738//abscisic acid-activated signaling pathway;GO:0055114//oxidation-reduction process	gi|359497710|ref|XP_003635614.1|/0.0/PREDICTED: primary amine oxidase-like, partial [Vitis vinifera]
VIT_205s0094g01210	1398	200.531	759.268	1.91751	K00276	ko00260 Glycine, serine and threonine metabolism ( Amino acid metabolism)	GO:0005576//extracellular region;GO:0005768//endosome;GO:0005773//vacuole;GO:0005794//Golgi apparatus;GO:0005802//trans-Golgi network	GO:0005507//copper ion binding;GO:0008131//primary amine oxidase activity;GO:0048038//quinone binding	GO:0006809//nitric oxide biosynthetic process;GO:0009308//amine metabolic process;GO:0009738//abscisic acid-activated signaling pathway;GO:0055114//oxidation-reduction process	gi|255537061|ref|XP_002509597.1|/1.42333E-163/Amine oxidase [copper-containing] precursor, putative [Ricinus communis]
VIT_200s1682g00010	617	151.817	515.11	1.75841	K00276	ko00260 Glycine, serine and threonine metabolism ( Amino acid metabolism)	GO:0005576//extracellular region;GO:0005634//nucleus;GO:0005768//endosome;GO:0005773//vacuole;GO:0005794//Golgi apparatus;GO:0005802//trans-Golgi network	GO:0005507//copper ion binding;GO:0008131//primary amine oxidase activity;GO:0048038//quinone binding	GO:0006809//nitric oxide biosynthetic process;GO:0009308//amine metabolic process;GO:0009738//abscisic acid-activated signaling pathway;GO:0055114//oxidation-reduction process	gi|296084787|emb|CBI25930.3|/7.0151E-15/unnamed protein product [Vitis vinifera]
VIT_207s0005g06570	290	34.2373	113.319	1.70875	K00600	ko00260 Glycine, serine and threonine metabolism ( Amino acid metabolism)	-	-	-	gi|297744361|emb|CBI37331.3|/1.77353E-25/unnamed protein product [Vitis vinifera]
VIT_205s0029g00310	2227	760.32	2403.22	1.65949	K00600	ko00260 Glycine, serine and threonine metabolism ( Amino acid metabolism)	GO:0005829//cytosol;GO:0005886//plasma membrane;GO:0009506//plasmodesma	GO:0004372//glycine hydroxymethyltransferase activity;GO:0008168//methyltransferase activity;GO:0030170//pyridoxal phosphate binding	GO:0006544//glycine metabolic process;GO:0006563//L-serine metabolic process;GO:0009555//pollen development;GO:0010197//polar nucleus fusion;GO:0032259//methylation;GO:0035999//tetrahydrofolate interconversion;GO:0046686//response to cadmium ion	gi|225433510|ref|XP_002266276.1|/0.0/PREDICTED: serine hydroxymethyltransferase 1 [Vitis vinifera]
VIT_204s0023g03480	1951	115.323	278.894	1.26951	K00276;K14856	ko00260 Glycine, serine and threonine metabolism ( Amino acid metabolism)	GO:0005634//nucleus;GO:0005737//cytoplasm;GO:0005886//plasma membrane;GO:0090404//pollen tube tip	GO:0005515//protein binding	GO:0009827//plant-type cell wall modification;GO:0009860//pollen tube growth;GO:0030036//actin cytoskeleton organization;GO:0030048//actin filament-based movement	gi|147826595|emb|CAN77454.1|/0.0/hypothetical protein VITISV_008543 [Vitis vinifera]
VIT_218s0001g12950	3563	163.274	599.604	1.87274	K00133	ko00260 Glycine, serine and threonine metabolism(Amino acid metabolism)	GO:0005739//mitochondrion;GO:0005794//Golgi apparatus;GO:0005886//plasma membrane	GO:0005215//transporter activity	GO:0006810//transport	gi|225458197|ref|XP_002281429.1|/0.0/PREDICTED: uncharacterized protein LOC100248963 isoform 2 [Vitis vinifera]
VIT_207s0031g03220	2136.47	323.891	702.468	1.11544	K00133;K00133	ko00260 Glycine, serine and threonine metabolism(Amino acid metabolism)	GO:0005773//vacuole;GO:0005886//plasma membrane;GO:0009507//chloroplast;GO:0016021//integral component of membrane;GO:0048046//apoplast;GO:0005773//vacuole;GO:0005886//plasma membrane;GO:0009507//chloroplast;GO:0016021//integral component of membrane;GO:0048046//apoplast	GO:0005215//transporter activity;GO:0005215//transporter activity	GO:0006810//transport;GO:0009860//pollen tube growth;GO:0006810//transport;GO:0009860//pollen tube growth	gi|359480790|ref|XP_002271899.2|/0.0/PREDICTED: patellin-5-like [Vitis vinifera]
VIT_211s0118g00230	2414.58	116.042	443.582	1.92888	K01652;K12486;K01652;K12486;K12486;K12486;K01652;K12486	ko00290 Valine, leucine and isoleucine biosynthesis ( Amino acid metabolism)	GO:0005783//endoplasmic reticulum;GO:0005886//plasma membrane;GO:0009506//plasmodesma;GO:0012505//endomembrane system;GO:0005783//endoplasmic reticulum;GO:0005886//plasma membrane;GO:0009506//plasmodesma;GO:0012505//endomembrane system;GO:0005783//endoplasmic reticulum;GO:0005886//plasma membrane;GO:0009506//plasmodesma;GO:0012505//endomembrane system;GO:0005783//endoplasmic reticulum;GO:0005886/…	GO:0005515//protein binding;GO:0005515//protein binding;GO:0005515//protein binding;GO:0005515//protein binding;GO:0005515//protein binding	GO:0009887//organ morphogenesis;GO:0009888//tissue development;GO:0010638//positive regulation of organelle organization;GO:0016126//sterol biosynthetic process;GO:0019745//pentacyclic triterpenoid biosynthetic process;GO:0033044//regulation of chromosome organization;GO:0009887//organ morphogenesis;GO:0009888//tissue development;GO:0010638//positive regulation of organelle organization;GO:001612…	gi|225446229|ref|XP_002265034.1|/0.0/PREDICTED: extended synaptotagmin-1 [Vitis vinifera]
VIT_203s0038g00760	2930	2248.63	7747.53	1.78441	K01583	ko00330 Arginine and proline metabolism (Amino acid metabolism)	-	GO:0008792//arginine decarboxylase activity	GO:0006527//arginine catabolic process;GO:0006560//proline metabolic process;GO:0006979//response to oxidative stress;GO:0008295//spermidine biosynthetic process;GO:0009409//response to cold;GO:0009446//putrescine biosynthetic process;GO:0009611//response to wounding;GO:0009651//response to salt stress;GO:0009737//response to abscisic acid;GO:0009753//response to jasmonic acid;GO:0048316//seed de…	gi|225427782|ref|XP_002269030.1|/0.0/PREDICTED: arginine decarboxylase [Vitis vinifera]
VIT_218s0001g10690	1241	38.031	16.8415	-1.14636	K14499	ko04075 Plant hormone signal transduction ( Signal transduction)	GO:0005829//cytosol;GO:0005886//plasma membrane	GO:0046982//protein heterodimerization activity	GO:0010423//negative regulation of brassinosteroid biosynthetic process	gi|225458591|ref|XP_002284646.1|/7.26345E-114/PREDICTED: BRI1 kinase inhibitor 1 [Vitis vinifera]
VIT_209s0002g00650	829	0.45828	20.0326	4.26043	K14488	ko04075 Plant hormone signal transduction (Signal transduction)	GO:0005739//mitochondrion	GO:0005516//calmodulin binding	GO:0009734//auxin-activated signaling pathway;GO:0016126//sterol biosynthetic process	gi|147782667|emb|CAN61793.1|/1.73278E-98/hypothetical protein VITISV_015798 [Vitis vinifera]
VIT_211s0052g01200	1448	23.8934	227.191	3.21623	K14504;K08235	ko04075 Plant hormone signal transduction (Signal transduction)	GO:0005618//cell wall;GO:0048046//apoplast	GO:0004553//hydrolase activity, hydrolyzing O-glycosyl compounds;GO:0016762//xyloglucan:xyloglucosyl transferase activity	GO:0006073//cellular glucan metabolic process	gi|359484996|ref|XP_002273742.2|/5.40107E-163/PREDICTED: probable xyloglucan endotransglucosylase/hydrolase protein 23-like [Vitis vinifera]
VIT_211s0052g01190	1238	27.7901	225.553	2.99299	K14504;K08235	ko04075 Plant hormone signal transduction (Signal transduction)	GO:0005618//cell wall;GO:0048046//apoplast	GO:0004553//hydrolase activity, hydrolyzing O-glycosyl compounds;GO:0016762//xyloglucan:xyloglucosyl transferase activity	GO:0006073//cellular glucan metabolic process	gi|297735373|emb|CBI17813.3|/7.51488E-153/unnamed protein product [Vitis vinifera]
VIT_211s0052g01270	1286	7.22747	51.8154	2.74035	K14504;K08235	ko04075 Plant hormone signal transduction (Signal transduction)	GO:0005618//cell wall;GO:0048046//apoplast	GO:0004553//hydrolase activity, hydrolyzing O-glycosyl compounds;GO:0016762//xyloglucan:xyloglucosyl transferase activity	GO:0006073//cellular glucan metabolic process	gi|225446113|ref|XP_002274601.1|/2.86888E-158/PREDICTED: probable xyloglucan endotransglucosylase/hydrolase protein 23 [Vitis vinifera]
VIT_216s0098g01150	789	49.146	291.967	2.55565	K14488	ko04075 Plant hormone signal transduction (Signal transduction)	GO:0005739//mitochondrion	-	GO:0006816//calcium ion transport;GO:0009733//response to auxin	gi|225455256|ref|XP_002273092.1|/1.1692E-50/PREDICTED: indole-3-acetic acid-induced protein ARG7 [Vitis vinifera]
VIT_204s0008g02800	759	5.95764	36.38	2.49201	K14488	ko04075 Plant hormone signal transduction (Signal transduction)	-	GO:0005516//calmodulin binding;GO:0005524//ATP binding;GO:0016301//kinase activity	GO:0009734//auxin-activated signaling pathway;GO:0016310//phosphorylation	gi|225429838|ref|XP_002280896.1|/8.56138E-72/PREDICTED: uncharacterized protein LOC100250771 [Vitis vinifera]
VIT_210s0003g03790	1241	5.83632	35.1976	2.47202	K13464	ko04075 Plant hormone signal transduction (Signal transduction)	-	GO:0005515//protein binding	-	gi|225443888|ref|XP_002277769.1|/5.69518E-63/PREDICTED: protein TIFY 5A [Vitis vinifera]
VIT_213s0067g03070	1991	60.1733	303.747	2.32384	K14492	ko04075 Plant hormone signal transduction (Signal transduction)	GO:0005634//nucleus;GO:0005739//mitochondrion;GO:0009536//plastid	GO:0000156//phosphorelay response regulator activity;GO:0004674//protein serine/threonine kinase activity;GO:0005515//protein binding	GO:0000160//phosphorelay signal transduction system;GO:0006355//regulation of transcription, DNA-templated;GO:0006612//protein targeting to membrane;GO:0009069//serine family amino acid metabolic process;GO:0009736//cytokinin-activated signaling pathway;GO:0009793//embryo development ending in seed dormancy;GO:0009963//positive regulation of flavonoid biosynthetic process;GO:0010017//red or far-r…	gi|225448707|ref|XP_002280746.1|/3.26131E-75/PREDICTED: two-component response regulator ARR17 [Vitis vinifera]
VIT_211s0016g00710	2265.4	243.873	1186.63	2.27977	K13464;K13464	ko04075 Plant hormone signal transduction (Signal transduction)	GO:0005634//nucleus	GO:0005515//protein binding;GO:0005515//protein binding	GO:0009555//pollen development;GO:0009620//response to fungus;GO:0009628//response to abiotic stimulus;GO:0009863//salicylic acid mediated signaling pathway;GO:0009867//jasmonic acid mediated signaling pathway;GO:0009908//flower development;GO:0031347//regulation of defense response;GO:0033554//cellular response to stress;GO:0035556//intracellular signal transduction;GO:0042742//defense response …	gi|225444663|ref|XP_002277157.1|/1.15003E-133/PREDICTED: protein TIFY 10A [Vitis vinifera]
VIT_208s0007g01520	2561.22	184.68	800.76	2.11263	K14500;K14500;K14500;K14500	ko04075 Plant hormone signal transduction (Signal transduction)	GO:0005886//plasma membrane;GO:0009506//plasmodesma;GO:0005886//plasma membrane;GO:0009506//plasmodesma;GO:0005886//plasma membrane;GO:0009506//plasmodesma;GO:0005886//plasma membrane;GO:0009506//plasmodesma	GO:0004713//protein tyrosine kinase activity;GO:0005515//protein binding;GO:0005524//ATP binding;GO:0004672//protein kinase activity;GO:0005515//protein binding;GO:0005524//ATP binding;GO:0004672//protein kinase activity;GO:0005515//protein binding;GO:0005524//ATP binding;GO:0004672//protein kinase activity;GO:0005515//protein binding;GO:0005524//ATP binding	GO:0006468//protein phosphorylation;GO:0006468//protein phosphorylation;GO:0006468//protein phosphorylation;GO:0006468//protein phosphorylation	gi|225440554|ref|XP_002276280.1|/0.0/PREDICTED: probable serine/threonine-protein kinase At5g41260 [Vitis vinifera]
VIT_213s0019g04380	3164.8	78.8813	217.169	1.45389	K14486;K14486;K14486;K14486	ko04075 Plant hormone signal transduction (Signal transduction)	GO:0005634//nucleus;GO:0005634//nucleus;GO:0005634//nucleus;GO:0005634//nucleus	GO:0003677//DNA binding;GO:0046983//protein dimerization activity;GO:0003677//DNA binding;GO:0046983//protein dimerization activity;GO:0003677//DNA binding;GO:0046983//protein dimerization activity;GO:0003677//DNA binding;GO:0046983//protein dimerization activity	GO:0006355//regulation of transcription, DNA-templated;GO:0007389//pattern specification process;GO:0009734//auxin-activated signaling pathway;GO:0009738//abscisic acid-activated signaling pathway;GO:0009743//response to carbohydrate;GO:0010154//fruit development;GO:0031540//regulation of anthocyanin biosynthetic process;GO:0048366//leaf development;GO:0048441//petal development;GO:0048442//sepal…	gi|225449038|ref|XP_002273590.1|/0.0/PREDICTED: auxin response factor 18 [Vitis vinifera]
VIT_219s0090g01740	2691.53	747.899	1895.48	1.34092	K14494;K14494;K14494;K14494	ko04075 Plant hormone signal transduction (Signal transduction)	GO:0005737//cytoplasm;GO:0005737//cytoplasm;GO:0005737//cytoplasm;GO:0005737//cytoplasm	GO:0004871//signal transducer activity;GO:0004871//signal transducer activity;GO:0004871//signal transducer activity;GO:0004871//signal transducer activity	GO:0006355//regulation of transcription, DNA-templated;GO:0007165//signal transduction;GO:0009640//photomorphogenesis;GO:0006355//regulation of transcription, DNA-templated;GO:0007165//signal transduction;GO:0009640//photomorphogenesis;GO:0006355//regulation of transcription, DNA-templated;GO:0007165//signal transduction;GO:0009640//photomorphogenesis;GO:0006355//regulation of transcription, DNA-…	gi|297737537|emb|CBI26738.3|/0.0/unnamed protein product [Vitis vinifera]
VIT_218s0122g00380	5511	829.654	1834.1	1.1439	K13415;K13415	ko04075 Plant hormone signal transduction (Signal transduction)	GO:0005634//nucleus;GO:0005886//plasma membrane;GO:0005634//nucleus;GO:0005886//plasma membrane	GO:0003677//DNA binding;GO:0016491//oxidoreductase activity;GO:0046872//metal ion binding;GO:0051537//2 iron, 2 sulfur cluster binding;GO:0003677//DNA binding;GO:0016491//oxidoreductase activity;GO:0046872//metal ion binding;GO:0051537//2 iron, 2 sulfur cluster binding	GO:0042742//defense response to bacterium;GO:0045893//positive regulation of transcription, DNA-templated;GO:0055114//oxidation-reduction process;GO:0042742//defense response to bacterium;GO:0045893//positive regulation of transcription, DNA-templated;GO:0055114//oxidation-reduction process	gi|225457689|ref|XP_002273784.1|/0.0/PREDICTED: squamosa promoter-binding-like protein 14-like [Vitis vinifera]
VIT_218s0001g08600	3294.25	78.3652	35.6797	-1.12164	K12126;K11253;K11253;K12126	ko04075 Plant hormone signal transduction (Signal transduction)	GO:0005634//nucleus;GO:0005634//nucleus	GO:0046983//protein dimerization activity;GO:0046983//protein dimerization activity	-	gi|225458914|ref|XP_002285475.1|/0.0/PREDICTED: transcription factor bHLH74 [Vitis vinifera]
VIT_201s0010g03710	2402.33	64.1063	28.7622	-1.13943	K13415;K13415;K13415;K13415;K13415;K13415	ko04075 Plant hormone signal transduction (Signal transduction)	GO:0005634//nucleus;GO:0044444//cytoplasmic part;GO:0005634//nucleus;GO:0044444//cytoplasmic part;GO:0005634//nucleus;GO:0044444//cytoplasmic part;GO:0005634//nucleus;GO:0044444//cytoplasmic part;GO:0005634//nucleus;GO:0044444//cytoplasmic part;GO:0005634//nucleus;GO:0044444//cytoplasmic part	GO:0003677//DNA binding;GO:0046872//metal ion binding;GO:0003677//DNA binding;GO:0046872//metal ion binding;GO:0003677//DNA binding;GO:0046872//metal ion binding;GO:0003677//DNA binding;GO:0046872//metal ion binding;GO:0003677//DNA binding;GO:0046872//metal ion binding;GO:0003677//DNA binding;GO:0046872//metal ion binding	GO:0006351//transcription, DNA-templated;GO:0048513//animal organ development;GO:0050789;GO:0006351//transcription, DNA-templated;GO:0048513//animal organ development;GO:0050789;GO:0006351//transcription, DNA-templated;GO:0048513//animal organ development;GO:0050789;GO:0006351//transcription, DNA-templated;GO:0048513//animal organ development;GO:0050789;GO:0006351//transcription, DNA-templated;GO…	gi|225425402|ref|XP_002271312.1|/0.0/PREDICTED: squamosa promoter-binding-like protein 12-like [Vitis vinifera]
VIT_201s0011g00130	3616	23.6968	8.709	-1.38223	K13415;K13415	ko04075 Plant hormone signal transduction (Signal transduction)	GO:0005634//nucleus;GO:0005634//nucleus	GO:0003677//DNA binding;GO:0003677//DNA binding	-	gi|359472829|ref|XP_002273534.2|/0.0/PREDICTED: squamosa promoter-binding-like protein 6-like [Vitis vinifera]
VIT_218s0089g00400	1094	74.4204	25.6742	-1.51295	K14493	ko04075 Plant hormone signal transduction (Signal transduction)	-	GO:0050253//retinyl-palmitate esterase activity;GO:0080030//methyl indole-3-acetate esterase activity;GO:0080031//methyl salicylate esterase activity;GO:0080032//methyl jasmonate esterase activity	GO:0009860//pollen tube growth;GO:0042572//retinol metabolic process	gi|225460000|ref|XP_002268736.1|/0.0/PREDICTED: probable carboxylesterase 18-like [Vitis vinifera]
VIT_212s0059g01870	2443.88	67.2098	17.4386	-1.90927	K14487;K14487	ko04075 Plant hormone signal transduction (Signal transduction)	GO:0009507//chloroplast;GO:0009507//chloroplast	-	GO:0009416//response to light stimulus;GO:0009651//response to salt stress;GO:0009733//response to auxin;GO:0009737//response to abscisic acid;GO:0009416//response to light stimulus;GO:0009651//response to salt stress;GO:0009733//response to auxin;GO:0009737//response to abscisic acid	gi|225447231|ref|XP_002272560.1|/0.0/PREDICTED: probable indole-3-acetic acid-amido synthetase GH3.5 [Vitis vinifera]
VIT_215s0048g02860	687	167.352	36.5244	-2.17702	K14488	ko04075 Plant hormone signal transduction (Signal transduction)	GO:0005634//nucleus;GO:0005739//mitochondrion	-	GO:0006816//calcium ion transport;GO:0009733//response to auxin	gi|225453575|ref|XP_002263012.1|/1.32456E-45/PREDICTED: auxin-induced protein 10A5 [Vitis vinifera]
VIT_209s0054g00725	1300	50.0041	9.77958	-2.28338	K14488	ko04075 Plant hormone signal transduction (Signal transduction)	-	-	-	gi|225443367|ref|XP_002266840.1|/1.70624E-86/PREDICTED: uncharacterized protein LOC100253008 [Vitis vinifera]
VIT_207s0129g01000	777	70.0465	8.17371	-3.00659	K14495	ko04075 Plant hormone signal transduction (Signal transduction)	GO:0005634//nucleus;GO:0019005//SCF ubiquitin ligase complex	GO:0005515//protein binding	GO:0009723//response to ethylene;GO:0009737//response to abscisic acid;GO:0009845//seed germination;GO:0009863//salicylic acid mediated signaling pathway;GO:0009867//jasmonic acid mediated signaling pathway;GO:0009939//positive regulation of gibberellic acid mediated signaling pathway;GO:0010162//seed dormancy process;GO:0010325//raffinose family oligosaccharide biosynthetic process;GO:0042538//h…	gi|359480655|ref|XP_003632510.1|/1.29383E-74/PREDICTED: F-box protein GID2-like [Vitis vinifera]
VIT_215s0046g00290	3033	74.9887	1.0912	-5.46607	K14486;K14486	ko04075 Plant hormone signal transduction (Signal transduction)	GO:0005634//nucleus;GO:0005634//nucleus	GO:0003677//DNA binding;GO:0046983//protein dimerization activity;GO:0003677//DNA binding;GO:0046983//protein dimerization activity	GO:0006355//regulation of transcription, DNA-templated;GO:0009734//auxin-activated signaling pathway;GO:0006355//regulation of transcription, DNA-templated;GO:0009734//auxin-activated signaling pathway	gi|359489584|ref|XP_002264072.2|/0.0/PREDICTED: auxin response factor 18-like [Vitis vinifera]
VIT_209s0002g03410	2106.36	178.594	55.9195	-1.66437	K14484;K14484;K14484	ko04075 Plant hormone signal transduction (Signal transduction)	GO:0005576//extracellular region;GO:0005667//transcription factor complex;GO:0005739//mitochondrion;GO:0005829//cytosol;GO:0005887//integral component of plasma membrane;GO:0008287//protein serine/threonine phosphatase complex;GO:0009505//plant-type cell wall;GO:0009507//chloroplast;GO:0005576//extracellular region;GO:0005667//transcription factor complex;GO:0005739//mitochondrion;GO:0005829//cyt…	GO:0003677//DNA binding;GO:0003700//transcription factor activity, sequence-specific DNA binding;GO:0003993//acid phosphatase activity;GO:0004722//protein serine/threonine phosphatase activity;GO:0008195//phosphatidate phosphatase activity;GO:0046983//protein dimerization activity;GO:0003677//DNA binding;GO:0003700//transcription factor activity, sequence-specific DNA binding;GO:0003993//acid pho…	GO:0006355//regulation of transcription, DNA-templated;GO:0006417//regulation of translation;GO:0006470//protein dephosphorylation;GO:0006687//glycosphingolipid metabolic process;GO:0006771//riboflavin metabolic process;GO:0006995//cellular response to nitrogen starvation;GO:0007020//microtubule nucleation;GO:0009395//phospholipid catabolic process;GO:0009651//response to salt stress;GO:0009723//…	gi|359482888|ref|XP_002283588.2|/6.37546E-125/PREDICTED: auxin-responsive protein IAA26-like [Vitis vinifera]
VIT_207s0031g01320	1388	125.73	14.7003	-3.04396	K14431	ko04075 Plant hormone signal transduction (Signal transduction)	GO:0005667//transcription factor complex	GO:0003700//transcription factor activity, sequence-specific DNA binding;GO:0005516//calmodulin binding;GO:0043565//sequence-specific DNA binding	GO:0006355//regulation of transcription, DNA-templated;GO:0006857//oligopeptide transport;GO:0009409//response to cold;GO:0009410//response to xenobiotic stimulus;GO:0009862//systemic acquired resistance, salicylic acid mediated signaling pathway;GO:0010043//response to zinc ion;GO:0010167//response to nitrate;GO:0010260//organ senescence;GO:0015706//nitrate transport;GO:0030968//endoplasmic reti…	gi|225438607|ref|XP_002280782.1|/0.0/PREDICTED: transcription factor TGA1 [Vitis vinifera]
VIT_200s0505g00040	6409	4.07229	36.3594	2.97855	K02709	ko00195 Photosynthesis ( Energy metabolism)	-	-	-	gi|297735947|emb|CBI23504.3|/5.37149E-51/unnamed protein product [Vitis vinifera]
VIT_201s0011g04500	1982	72.1986	219.27	1.59441	K02641;K00326	ko00195 Photosynthesis ( Energy metabolism)	GO:0009570//chloroplast stroma;GO:0009579//thylakoid;GO:0009941//chloroplast envelope	GO:0005507//copper ion binding;GO:0016491//oxidoreductase activity	GO:0055114//oxidation-reduction process	gi|147838607|emb|CAN69513.1|/3.32755E-150/hypothetical protein VITISV_018719 [Vitis vinifera]
VIT_214s0060g02430	1704	92.3511	39.2214	-1.22253	K02717	ko00195 Photosynthesis (Energy metabolism)	GO:0009507//chloroplast;GO:0009654//photosystem II oxygen evolving complex;GO:0019898//extrinsic component of membrane	GO:0005509//calcium ion binding	GO:0015979//photosynthesis	gi|225450829|ref|XP_002279749.1|/8.81987E-155/PREDICTED: uncharacterized protein LOC100244224 [Vitis vinifera]
VIT_214s0081g00060	1025	770.325	320.241	-1.26468	K02721	ko00195 Photosynthesis (Energy metabolism)	GO:0009523//photosystem II;GO:0009535//chloroplast thylakoid membrane;GO:0016021//integral component of membrane	-	GO:0016043//cellular component organization;GO:0042549//photosystem II stabilization;GO:0044085	gi|225453018|ref|XP_002264508.1|/4.30506E-52/PREDICTED: photosystem II reaction center W protein, chloroplastic [Vitis vinifera]
VIT_206s0004g00880	2142	418.763	173.412	-1.26892	K02634	ko00195 Photosynthesis (Energy metabolism)	-	-	-	-
VIT_200s0125g00280	3835	2586.01	1049.63	-1.30035	K02694	ko00195 Photosynthesis (Energy metabolism)	GO:0009535//chloroplast thylakoid membrane;GO:0009538//photosystem I reaction center;GO:0009543//chloroplast thylakoid lumen;GO:0009941//chloroplast envelope;GO:0010287//plastoglobule	-	GO:0015979//photosynthesis;GO:0019344//cysteine biosynthetic process	gi|225465117|ref|XP_002272584.1|/1.79631E-108/PREDICTED: photosystem I reaction center subunit III, chloroplastic isoform 1 [Vitis vinifera]
VIT_200s0904g00010	2173.81	2413.5	908.691	-1.40865	K08901;K08901	ko00195 Photosynthesis (Energy metabolism)	GO:0009535//chloroplast thylakoid membrane;GO:0009543//chloroplast thylakoid lumen;GO:0009570//chloroplast stroma;GO:0009654//photosystem II oxygen evolving complex;GO:0019898//extrinsic component of membrane;GO:0048046//apoplast;GO:0009535//chloroplast thylakoid membrane;GO:0009543//chloroplast thylakoid lumen;GO:0009570//chloroplast stroma;GO:0009654//photosystem II oxygen evolving complex;GO:0…	GO:0005509//calcium ion binding;GO:0005509//calcium ion binding	GO:0009853//photorespiration;GO:0015979//photosynthesis;GO:0030003//cellular cation homeostasis;GO:0070838//divalent metal ion transport;GO:0009853//photorespiration;GO:0015979//photosynthesis;GO:0030003//cellular cation homeostasis;GO:0070838//divalent metal ion transport	gi|225469185|ref|XP_002275624.1|/2.74288E-75/PREDICTED: oxygen-evolving enhancer protein 3-2, chloroplastic [Vitis vinifera]
VIT_204s0044g01410	2800.6	1407.68	518.08	-1.44098	K02701;K02701	ko00195 Photosynthesis (Energy metabolism)	GO:0009543//chloroplast thylakoid lumen;GO:0030093//chloroplast photosystem I;GO:0009543//chloroplast thylakoid lumen;GO:0030093//chloroplast photosystem I	GO:0005516//calmodulin binding;GO:0005516//calmodulin binding	GO:0006098//pentose-phosphate shunt;GO:0009773//photosynthetic electron transport in photosystem I;GO:0019344//cysteine biosynthetic process;GO:0035304//regulation of protein dephosphorylation;GO:0006098//pentose-phosphate shunt;GO:0009773//photosynthetic electron transport in photosystem I;GO:0019344//cysteine biosynthetic process;GO:0035304//regulation of protein dephosphorylation	gi|359476926|ref|XP_003631913.1|/2.99078E-55/PREDICTED: photosystem I reaction center subunit N, chloroplastic [Vitis vinifera]
VIT_201s0026g02680	1631	89.4273	18.5917	-2.22874	K08901	ko00195 Photosynthesis (Energy metabolism)	GO:0009344//nitrite reductase complex [NAD(P)H];GO:0009543//chloroplast thylakoid lumen;GO:0009654//photosystem II oxygen evolving complex;GO:0019898//extrinsic component of membrane;GO:0030095//chloroplast photosystem II	GO:0005509//calcium ion binding;GO:0045156//electron transporter, transferring electrons within the cyclic electron transport pathway of photosynthesis activity	GO:0000023//maltose metabolic process;GO:0006098//pentose-phosphate shunt;GO:0009767//photosynthetic electron transport chain;GO:0019252//starch biosynthetic process;GO:0043085//positive regulation of catalytic activity	gi|225425642|ref|XP_002272064.1|/1.88659E-105/PREDICTED: oxygen-evolving enhancer protein 3-2, chloroplastic [Vitis vinifera]
VIT_207s0151g01000	638	74.3159	14.3713	-2.32159	K02692	ko00195 Photosynthesis (Energy metabolism)	GO:0009535//chloroplast thylakoid membrane;GO:0009538//photosystem I reaction center;GO:0009941//chloroplast envelope;GO:0010287//plastoglobule	-	GO:0019684//photosynthesis, light reaction;GO:0030003//cellular cation homeostasis;GO:0035304//regulation of protein dephosphorylation;GO:0070838//divalent metal ion transport	gi|225437028|ref|XP_002278284.1|/4.30741E-101/PREDICTED: photosystem I reaction center subunit II, chloroplastic [Vitis vinifera]
VIT_219s0014g05080	1720	43.7971	5.53852	-2.85061	K08901;K08901	ko00195 Photosynthesis (Energy metabolism)	GO:0005739//mitochondrion;GO:0009344//nitrite reductase complex [NAD(P)H];GO:0009543//chloroplast thylakoid lumen;GO:0009654//photosystem II oxygen evolving complex;GO:0019898//extrinsic component of membrane;GO:0030095//chloroplast photosystem II;GO:0005739//mitochondrion;GO:0009344//nitrite reductase complex [NAD(P)H];GO:0009543//chloroplast thylakoid lumen;GO:0009654//photosystem II oxygen evo…	GO:0005509//calcium ion binding;GO:0045156//electron transporter, transferring electrons within the cyclic electron transport pathway of photosynthesis activity;GO:0005509//calcium ion binding;GO:0045156//electron transporter, transferring electrons within the cyclic electron transport pathway of photosynthesis activity	GO:0000023//maltose metabolic process;GO:0006098//pentose-phosphate shunt;GO:0009416//response to light stimulus;GO:0009767//photosynthetic electron transport chain;GO:0019252//starch biosynthetic process;GO:0043085//positive regulation of catalytic activity;GO:0000023//maltose metabolic process;GO:0006098//pentose-phosphate shunt;GO:0009416//response to light stimulus;GO:0009767//photosynthetic …	gi|225461148|ref|XP_002282744.1|/1.827E-107/PREDICTED: oxygen-evolving enhancer protein 3-1, chloroplastic [Vitis vinifera]
VIT_207s0005g02220	827	2650.72	188.119	-3.81227	K08912	ko00196 Photosynthesis - antenna proteins (Energy metabolism)	GO:0005739//mitochondrion;GO:0009522//photosystem I;GO:0009523//photosystem II;GO:0009535//chloroplast thylakoid membrane;GO:0009941//chloroplast envelope;GO:0010287//plastoglobule;GO:0016021//integral component of membrane;GO:0048046//apoplast	GO:0016168//chlorophyll binding;GO:0046872//metal ion binding	GO:0009637//response to blue light;GO:0009765//photosynthesis, light harvesting;GO:0010114//response to red light;GO:0010218//response to far red light;GO:0018298//protein-chromophore linkage	gi|359480215|ref|XP_002273106.2|/8.84479E-150/PREDICTED: chlorophyll a-b binding protein 1B, chloroplastic-like [Vitis vinifera]
VIT_217s0000g08370	3302.81	23.0415	740.144	4.96845	K13459;K13459;K13459;K13459;K13459	ko04626 Plant-pathogen interaction (Environmental adaptation)	GO:0005739//mitochondrion;GO:0005739//mitochondrion;GO:0005739//mitochondrion;GO:0005739//mitochondrion;GO:0005739//mitochondrion	GO:0003950//NAD+ ADP-ribosyltransferase activity;GO:0003950//NAD+ ADP-ribosyltransferase activity;GO:0003950//NAD+ ADP-ribosyltransferase activity;GO:0003950//NAD+ ADP-ribosyltransferase activity;GO:0003950//NAD+ ADP-ribosyltransferase activity	GO:0009407//toxin catabolic process;GO:0009651//response to salt stress;GO:0010200//response to chitin;GO:0010583//response to cyclopentenone;GO:0072593//reactive oxygen species metabolic process;GO:0009407//toxin catabolic process;GO:0009651//response to salt stress;GO:0010200//response to chitin;GO:0010583//response to cyclopentenone;GO:0072593//reactive oxygen species metabolic process;GO:0009…	gi|297733785|emb|CBI15032.3|/0.0/unnamed protein product [Vitis vinifera]
VIT_205s0102g00450	1063	161.006	913.525	2.49977	K13448	ko04626 Plant-pathogen interaction (Environmental adaptation)	GO:0005576//extracellular region;GO:0005777//peroxisome;GO:0005886//plasma membrane	GO:0005509//calcium ion binding;GO:0032440//2-alkenal reductase [NAD(P)] activity	GO:0055114//oxidation-reduction process	gi|225433888|ref|XP_002266359.1|/2.06842E-102/PREDICTED: calmodulin-like protein 5 [Vitis vinifera]
VIT_201s0146g00250	3561.47	986.897	5520.08	2.48297	K13430;K13430;K13430;K13430;K13430	ko04626 Plant-pathogen interaction (Environmental adaptation)	GO:0005886//plasma membrane;GO:0005886//plasma membrane;GO:0005886//plasma membrane;GO:0005886//plasma membrane;GO:0005886//plasma membrane	GO:0004674//protein serine/threonine kinase activity;GO:0004715//non-membrane spanning protein tyrosine kinase activity;GO:0005515//protein binding;GO:0005524//ATP binding;GO:0004674//protein serine/threonine kinase activity;GO:0004715//non-membrane spanning protein tyrosine kinase activity;GO:0005515//protein binding;GO:0005524//ATP binding;GO:0004674//protein serine/threonine kinase activity;GO…	GO:0009069//serine family amino acid metabolic process;GO:0009816//defense response to bacterium, incompatible interaction;GO:0046777//protein autophosphorylation;GO:0009069//serine family amino acid metabolic process;GO:0009816//defense response to bacterium, incompatible interaction;GO:0046777//protein autophosphorylation;GO:0009069//serine family amino acid metabolic process;GO:0009816//defens…	gi|225425176|ref|XP_002265076.1|/3.65955E-150/PREDICTED: serine/threonine-protein kinase PBS1 [Vitis vinifera]
VIT_207s0197g00090	2468	42.5367	177.011	2.04125	K13459;K13457;K15078	ko04626 Plant-pathogen interaction (Environmental adaptation)	-	GO:0005524//ATP binding;GO:0017111//nucleoside-triphosphatase activity;GO:0043531//ADP binding	GO:0006952//defense response	gi|359480451|ref|XP_002263407.2|/0.0/PREDICTED: probable disease resistance protein At5g66900-like [Vitis vinifera]
VIT_217s0000g02480	626	1010.06	3965.79	1.97251	K13448	ko04626 Plant-pathogen interaction (Environmental adaptation)	GO:0005737//cytoplasm;GO:0012505//endomembrane system;GO:0016020//membrane	GO:0005509//calcium ion binding;GO:0032440//2-alkenal reductase [NAD(P)] activity	GO:0055114//oxidation-reduction process	gi|297734315|emb|CBI15562.3|/6.35491E-46/unnamed protein product [Vitis vinifera]
VIT_202s0025g04520	4025.36	138.371	506.257	1.86665	K13412;K13412;K13412;K13412	ko04626 Plant-pathogen interaction (Environmental adaptation)	GO:0005634//nucleus;GO:0005634//nucleus;GO:0005634//nucleus;GO:0005634//nucleus	GO:0004683//calmodulin-dependent protein kinase activity;GO:0004713//protein tyrosine kinase activity;GO:0005524//ATP binding;GO:0004683//calmodulin-dependent protein kinase activity;GO:0004713//protein tyrosine kinase activity;GO:0005524//ATP binding;GO:0004683//calmodulin-dependent protein kinase activity;GO:0004713//protein tyrosine kinase activity;GO:0005524//ATP binding;GO:0004683//calmoduli…	GO:0009069//serine family amino acid metabolic process;GO:0046777//protein autophosphorylation;GO:0009069//serine family amino acid metabolic process;GO:0046777//protein autophosphorylation;GO:0009069//serine family amino acid metabolic process;GO:0046777//protein autophosphorylation;GO:0009069//serine family amino acid metabolic process;GO:0046777//protein autophosphorylation	gi|225426761|ref|XP_002275946.1|/7.78158E-175/PREDICTED: calcium-dependent protein kinase 34 [Vitis vinifera]
VIT_206s0080g00450	1435	154.021	502.014	1.70059	K13448	ko04626 Plant-pathogen interaction (Environmental adaptation)	-	GO:0005509//calcium ion binding;GO:0016301//kinase activity	GO:0016310//phosphorylation	gi|225464942|ref|XP_002275521.1|/3.64318E-103/PREDICTED: probable calcium-binding protein CML48 [Vitis vinifera]
VIT_207s0197g00250	3234	128.786	406.668	1.65415	K13459;K09873;K15078;K13415	ko04626 Plant-pathogen interaction (Environmental adaptation)	-	GO:0005515//protein binding;GO:0005524//ATP binding;GO:0017111//nucleoside-triphosphatase activity;GO:0043531//ADP binding	GO:0006952//defense response	gi|359480461|ref|XP_002268207.2|/0.0/PREDICTED: probable disease resistance protein At5g66900-like [Vitis vinifera]
VIT_214s0068g01540	1638.17	77.1352	217.54	1.48839	K13430;K13430;K13430;K13430	ko04626 Plant-pathogen interaction (Environmental adaptation)	GO:0005739//mitochondrion;GO:0005886//plasma membrane;GO:0005886//plasma membrane;GO:0005739//mitochondrion;GO:0005886//plasma membrane	GO:0004674//protein serine/threonine kinase activity;GO:0004715//non-membrane spanning protein tyrosine kinase activity;GO:0005515//protein binding;GO:0005524//ATP binding;GO:0004674//protein serine/threonine kinase activity;GO:0004715//non-membrane spanning protein tyrosine kinase activity;GO:0005524//ATP binding;GO:0004674//protein serine/threonine kinase activity;GO:0004715//non-membrane spann…	GO:0009069//serine family amino acid metabolic process;GO:0009816//defense response to bacterium, incompatible interaction;GO:0046777//protein autophosphorylation;GO:0009069//serine family amino acid metabolic process;GO:0009816//defense response to bacterium, incompatible interaction;GO:0046777//protein autophosphorylation;GO:0009069//serine family amino acid metabolic process;GO:0009816//defens…	gi|147820255|emb|CAN71474.1|/1.19499E-174/hypothetical protein VITISV_038616 [Vitis vinifera]
VIT_213s0067g03410	1883	136.177	371.441	1.4435	K13430;K04733	ko04626 Plant-pathogen interaction (Environmental adaptation)	GO:0005886//plasma membrane	GO:0004674//protein serine/threonine kinase activity;GO:0004715//non-membrane spanning protein tyrosine kinase activity;GO:0005524//ATP binding	GO:0006468//protein phosphorylation;GO:0009069//serine family amino acid metabolic process	gi|225448749|ref|XP_002281418.1|/0.0/PREDICTED: serine/threonine-protein kinase PBS1 [Vitis vinifera]
VIT_217s0000g07560	3173	139.655	364.359	1.37956	K18875;K18875	ko04626 Plant-pathogen interaction (Environmental adaptation)	-	GO:0004806//triglyceride lipase activity;GO:0004806//triglyceride lipase activity	GO:0016042//lipid catabolic process;GO:0046486//glycerolipid metabolic process;GO:0016042//lipid catabolic process;GO:0046486//glycerolipid metabolic process	gi|225457168|ref|XP_002283818.1|/0.0/PREDICTED: uncharacterized protein LOC100233033 [Vitis vinifera]
VIT_214s0108g01420	2845.14	610.795	273.293	-1.15844	K05391;K05391;K05391;K05391	ko04626 Plant-pathogen interaction (Environmental adaptation)	GO:0005622//intracellular;GO:0005886//plasma membrane;GO:0017071//intracellular cyclic nucleotide activated cation channel complex;GO:0005622//intracellular;GO:0005886//plasma membrane;GO:0017071//intracellular cyclic nucleotide activated cation channel complex;GO:0005739//mitochondrion;GO:0005886//plasma membrane;GO:0017071//intracellular cyclic nucleotide activated cation channel complex;GO:000…	GO:0005222//intracellular cAMP activated cation channel activity;GO:0005242//inward rectifier potassium channel activity;GO:0005262//calcium channel activity;GO:0005516//calmodulin binding;GO:0030551//cyclic nucleotide binding;GO:0005222//intracellular cAMP activated cation channel activity;GO:0005242//inward rectifier potassium channel activity;GO:0005262//calcium channel activity;GO:0005516//ca…	GO:0007263//nitric oxide mediated signal transduction;GO:0009626//plant-type hypersensitive response;GO:0070588//calcium ion transmembrane transport;GO:0007263//nitric oxide mediated signal transduction;GO:0009626//plant-type hypersensitive response;GO:0070588//calcium ion transmembrane transport;GO:0007263//nitric oxide mediated signal transduction;GO:0009626//plant-type hypersensitive response;…	gi|225452934|ref|XP_002284164.1|/0.0/PREDICTED: cyclic nucleotide-gated ion channel 2 [Vitis vinifera]
VIT_219s0014g00900	2766	348.245	142.799	-1.28244	K13459	ko04626 Plant-pathogen interaction (Environmental adaptation)	-	GO:0043531//ADP binding	GO:0006952//defense response	gi|359493997|ref|XP_002283439.2|/0.0/PREDICTED: probable disease resistance protein At4g27220-like [Vitis vinifera]
VIT_214s0030g00840	3144.57	128.886	45.7375	-1.48215	K13459;K13459;K13459	ko04626 Plant-pathogen interaction (Environmental adaptation)	-	GO:0005515//protein binding;GO:0005524//ATP binding;GO:0017111//nucleoside-triphosphatase activity;GO:0043531//ADP binding;GO:0005524//ATP binding;GO:0017111//nucleoside-triphosphatase activity;GO:0043531//ADP binding;GO:0005515//protein binding;GO:0005524//ATP binding;GO:0017111//nucleoside-triphosphatase activity;GO:0043531//ADP binding	GO:0006952//defense response;GO:0006952//defense response;GO:0006952//defense response	gi|298204973|emb|CBI34280.3|/0.0/unnamed protein product [Vitis vinifera]
VIT_210s0042g00450	3859	45.8206	13.3859	-1.7294	K13459	ko04626 Plant-pathogen interaction (Environmental adaptation)	-	GO:0005524//ATP binding;GO:0017111//nucleoside-triphosphatase activity;GO:0043531//ADP binding	GO:0006952//defense response	gi|296085288|emb|CBI29020.3|/0.0/unnamed protein product [Vitis vinifera]
VIT_214s0030g00535	2954	24.5612	6.50597	-1.82129	K13459;K13459	ko04626 Plant-pathogen interaction (Environmental adaptation)	-	GO:0004721//phosphoprotein phosphatase activity;GO:0005524//ATP binding;GO:0017111//nucleoside-triphosphatase activity;GO:0043531//ADP binding;GO:0004721//phosphoprotein phosphatase activity;GO:0005524//ATP binding;GO:0017111//nucleoside-triphosphatase activity;GO:0043531//ADP binding	GO:0006470//protein dephosphorylation;GO:0006952//defense response;GO:0006470//protein dephosphorylation;GO:0006952//defense response	gi|298205008|emb|CBI34315.3|/1.64495E-44/unnamed protein product [Vitis vinifera]
VIT_218s0001g03880	471	26.3943	1.64712	-3.57521	K13448;K02183	ko04626 Plant-pathogen interaction (Environmental adaptation)	-	GO:0005509//calcium ion binding;GO:0032440//2-alkenal reductase [NAD(P)] activity	GO:0055114//oxidation-reduction process	gi|302141874|emb|CBI19077.3|/2.82067E-74/unnamed protein product [Vitis vinifera]
VIT_207s0031g01980	1911	26.3421	385.688	3.84078	K09286	EREBP-like factor (Transcription factors Eukaryotic Type)	GO:0005667//transcription factor complex	GO:0003677//DNA binding;GO:0003700//transcription factor activity, sequence-specific DNA binding	GO:0006355//regulation of transcription, DNA-templated;GO:0050896//response to stimulus	gi|225438481|ref|XP_002278226.1|/2.91726E-154/PREDICTED: ethylene-responsive transcription factor ABR1 [Vitis vinifera]
VIT_202s0234g00110	858	3.1209	36.0922	3.29505	K09286	EREBP-like factor (Transcription factors Eukaryotic Type)	GO:0012511//monolayer-surrounded lipid storage body;GO:0016021//integral component of membrane	-	GO:0009845//seed germination;GO:0010344//seed oilbody biogenesis;GO:0050826//response to freezing	gi|359473872|ref|XP_003631370.1|/1.40022E-69/PREDICTED: oleosin 16 kDa-like [Vitis vinifera]
VIT_202s0234g00130	1123	66.3281	558.26	3.06144	K09286	EREBP-like factor (Transcription factors Eukaryotic Type)	GO:0005667//transcription factor complex	GO:0003677//DNA binding;GO:0003700//transcription factor activity, sequence-specific DNA binding	GO:0009628//response to abiotic stimulus;GO:0009723//response to ethylene;GO:0009737//response to abscisic acid;GO:0009864//induced systemic resistance, jasmonic acid mediated signaling pathway;GO:0010200//response to chitin;GO:0032940//secretion by cell;GO:0045893//positive regulation of transcription, DNA-templated	gi|359473876|ref|XP_002270581.2|/4.16849E-116/PREDICTED: ethylene-responsive transcription factor 2-like [Vitis vinifera]
VIT_216s0100g00400	979	165.652	913.272	2.45848	K09286	EREBP-like factor (Transcription factors Eukaryotic Type)	GO:0005667//transcription factor complex	GO:0003677//DNA binding;GO:0003700//transcription factor activity, sequence-specific DNA binding	GO:0006355//regulation of transcription, DNA-templated;GO:0050832//defense response to fungus	gi|225455475|ref|XP_002280043.1|/6.1055E-93/PREDICTED: ethylene-responsive transcription factor ERF025-like [Vitis vinifera]
VIT_216s0100g00380	1093	78.6898	326.371	2.04369	K09286	EREBP-like factor (Transcription factors Eukaryotic Type)	GO:0005667//transcription factor complex	GO:0003677//DNA binding;GO:0003700//transcription factor activity, sequence-specific DNA binding	GO:0006355//regulation of transcription, DNA-templated;GO:0009414//response to water deprivation;GO:0009631//cold acclimation	gi|225455477|ref|XP_002280097.1|/1.92146E-97/PREDICTED: dehydration-responsive element-binding protein 1D [Vitis vinifera]
VIT_204s0008g06000	4177	830.602	2334.86	1.49042	K09286	EREBP-like factor (Transcription factors Eukaryotic Type)	GO:0005667//transcription factor complex	GO:0003677//DNA binding;GO:0003700//transcription factor activity, sequence-specific DNA binding	GO:0006355//regulation of transcription, DNA-templated;GO:0006952//defense response;GO:0009835//fruit ripening;GO:0009873//ethylene-activated signaling pathway	gi|225430392|ref|XP_002285373.1|/2.95013E-87/PREDICTED: ethylene-responsive transcription factor ERF003 [Vitis vinifera]
VIT_207s0031g00190	749	71.8044	201.158	1.47823	K09286	EREBP-like factor (Transcription factors Eukaryotic Type)	GO:0005667//transcription factor complex	GO:0003677//DNA binding;GO:0003700//transcription factor activity, sequence-specific DNA binding	GO:0006355//regulation of transcription, DNA-templated;GO:0009409//response to cold;GO:0009414//response to water deprivation	gi|225438785|ref|XP_002283112.1|/1.09481E-85/PREDICTED: ethylene-responsive transcription factor ERF008 [Vitis vinifera]
VIT_213s0067g01960	2029.06	103.275	244.326	1.23735	K09286;K09286	EREBP-like factor (Transcription factors Eukaryotic Type)	GO:0005667//transcription factor complex;GO:0005667//transcription factor complex	GO:0003677//DNA binding;GO:0003700//transcription factor activity, sequence-specific DNA binding;GO:0004386//helicase activity;GO:0005524//ATP binding;GO:0003677//DNA binding;GO:0003700//transcription factor activity, sequence-specific DNA binding;GO:0004386//helicase activity;GO:0005524//ATP binding	GO:0006355//regulation of transcription, DNA-templated;GO:0006355//regulation of transcription, DNA-templated	gi|225448564|ref|XP_002273838.1|/8.6073E-159/PREDICTED: dehydration-responsive element-binding protein 2C-like [Vitis vinifera]
VIT_216s0013g01064	1252	50.5274	22.149	-1.16762	K09286	EREBP-like factor (Transcription factors Eukaryotic Type)	GO:0005667//transcription factor complex	GO:0003677//DNA binding;GO:0003700//transcription factor activity, sequence-specific DNA binding	GO:0006355//regulation of transcription, DNA-templated	gi|359490125|ref|XP_002282048.2|/9.57152E-113/PREDICTED: LOW QUALITY PROTEIN: ethylene-responsive transcription factor 5 [Vitis vinifera]
VIT_216s0013g01000	946	90.746	34.8154	-1.36648	K09286	EREBP-like factor (Transcription factors Eukaryotic Type)	GO:0005667//transcription factor complex	GO:0003677//DNA binding;GO:0003700//transcription factor activity, sequence-specific DNA binding	GO:0006355//regulation of transcription, DNA-templated	gi|225455032|ref|XP_002281954.1|/6.06112E-136/PREDICTED: ethylene-responsive transcription factor 5-like [Vitis vinifera]
VIT_214s0006g02290	1189	50.5146	1.0912	-4.90181	K09286	EREBP-like factor (Transcription factors Eukaryotic Type)	GO:0005667//transcription factor complex	GO:0003677//DNA binding;GO:0003700//transcription factor activity, sequence-specific DNA binding	GO:0006355//regulation of transcription, DNA-templated	gi|225462803|ref|XP_002266287.1|/9.28652E-108/PREDICTED: ethylene-responsive transcription factor ERF034-like [Vitis vinifera]
VIT_218s0072g00260	3940	15.3378	290.485	4.18927	K09286	EREBP-like factor (Transcription factors Eukaryotic Type)	GO:0005667//transcription factor complex	GO:0003677//DNA binding;GO:0003700//transcription factor activity, sequence-specific DNA binding	GO:0006355//regulation of transcription, DNA-templated	gi|359493145|ref|XP_002264797.2|/1.53795E-121/PREDICTED: uncharacterized protein LOC100262406 [Vitis vinifera]
VIT_208s0007g00830	2376	8.63767	148.712	4.01184	K04730	ko04064 NF-kappa B signaling pathway (Signal transduction)	GO:0005886//plasma membrane;GO:0016023//cytoplasmic, membrane-bounded vesicle	GO:0004693//cyclin-dependent protein serine/threonine kinase activity;GO:0004713//protein tyrosine kinase activity;GO:0005524//ATP binding;GO:0030246//carbohydrate binding	GO:0006468//protein phosphorylation;GO:0007049//cell cycle;GO:0009069//serine family amino acid metabolic process	gi|359481749|ref|XP_003632669.1|/0.0/PREDICTED: L-type lectin-domain containing receptor kinase IV.2-like [Vitis vinifera]
VIT_202s0012g00150	2250.73	302.729	650.52	1.10199	K04730;K00924;K04730;K00924	ko04064 NF-kappa B signaling pathway (Signal transduction)	GO:0005886//plasma membrane;GO:0005886//plasma membrane	GO:0004674//protein serine/threonine kinase activity;GO:0004714//transmembrane receptor protein tyrosine kinase activity;GO:0005524//ATP binding;GO:0004674//protein serine/threonine kinase activity;GO:0004714//transmembrane receptor protein tyrosine kinase activity;GO:0005524//ATP binding	GO:0006468//protein phosphorylation;GO:0007169//transmembrane receptor protein tyrosine kinase signaling pathway;GO:0009069//serine family amino acid metabolic process;GO:0009627//systemic acquired resistance;GO:0009697//salicylic acid biosynthetic process;GO:0006468//protein phosphorylation;GO:0007169//transmembrane receptor protein tyrosine kinase signaling pathway;GO:0009069//serine family ami…	gi|225427370|ref|XP_002282904.1|/0.0/PREDICTED: probable receptor-like protein kinase At5g47070 [Vitis vinifera]
VIT_211s0037g00730	5464.44	177.834	382.453	1.10207	K04730;K04730	ko04064 NF-kappa B signaling pathway (Signal transduction)	GO:0005634//nucleus;GO:0009506//plasmodesma;GO:0005634//nucleus;GO:0009506//plasmodesma;GO:0005634//nucleus;GO:0009506//plasmodesma	GO:0008270//zinc ion binding;GO:0008270//zinc ion binding;GO:0008270//zinc ion binding	GO:0006914//autophagy;GO:0006914//autophagy;GO:0006914//autophagy	gi|225445782|ref|XP_002273616.1|/0.0/PREDICTED: uncharacterized protein LOC100267388 [Vitis vinifera]
VIT_204s0008g01220	2685	42.3122	251.718	2.55525	K04730;K04733	ko04064 NF-kappa B signaling pathway (Signal transduction)	GO:0016021//integral component of membrane	GO:0004672//protein kinase activity;GO:0005515//protein binding;GO:0005524//ATP binding	GO:0006468//protein phosphorylation	gi|359475948|ref|XP_002279173.2|/0.0/PREDICTED: probable leucine-rich repeat receptor-like protein kinase At1g68400-like [Vitis vinifera]
VIT_205s0020g03030	2121	91.0403	311.345	1.76702	K04730;K16224;K00924;K04730;K16224;K00924;K00924;K16224;K04730;K04733;K16224	ko04064 NF-kappa B signaling pathway (Signal transduction)	GO:0005886//plasma membrane;GO:0016023//cytoplasmic, membrane-bounded vesicle;GO:0005886//plasma membrane;GO:0016023//cytoplasmic, membrane-bounded vesicle;GO:0005886//plasma membrane;GO:0016023//cytoplasmic, membrane-bounded vesicle;GO:0005886//plasma membrane;GO:0016023//cytoplasmic, membrane-bounded vesicle	GO:0005515//protein binding;GO:0016301//kinase activity;GO:0005515//protein binding;GO:0016301//kinase activity;GO:0005515//protein binding;GO:0016301//kinase activity;GO:0016301//kinase activity	GO:0007165//signal transduction;GO:0016310//phosphorylation;GO:0007165//signal transduction;GO:0016310//phosphorylation;GO:0007165//signal transduction;GO:0016310//phosphorylation;GO:0007165//signal transduction;GO:0016310//phosphorylation	gi|225432596|ref|XP_002281432.1|/0.0/PREDICTED: probable LRR receptor-like serine/threonine-protein kinase At1g67720 [Vitis vinifera]
VIT_211s0052g00700	2269	30.0431	135.185	2.14699	K04733	ko04064 NF-kappa B signaling pathway (Signal transduction)	GO:0016023//cytoplasmic, membrane-bounded vesicle	GO:0004674//protein serine/threonine kinase activity;GO:0004715//non-membrane spanning protein tyrosine kinase activity;GO:0005524//ATP binding	GO:0006468//protein phosphorylation;GO:0009069//serine family amino acid metabolic process	gi|297735414|emb|CBI17854.3|/0.0/unnamed protein product [Vitis vinifera]
VIT_209s0002g03440	2956	200.33	667.24	1.73271	K04733	ko04064 NF-kappa B signaling pathway (Signal transduction)	GO:0005886//plasma membrane	GO:0004674//protein serine/threonine kinase activity;GO:0004715//non-membrane spanning protein tyrosine kinase activity;GO:0005524//ATP binding	GO:0006468//protein phosphorylation;GO:0007020//microtubule nucleation;GO:0009069//serine family amino acid metabolic process;GO:0016998//cell wall macromolecule catabolic process	gi|359482890|ref|XP_002283628.2|/0.0/PREDICTED: proline-rich receptor-like protein kinase PERK10-like [Vitis vinifera]
VIT_200s0929g00020	2130	129.255	370.561	1.515	K04733	ko04064 NF-kappa B signaling pathway (Signal transduction)	GO:0005634//nucleus;GO:0005829//cytosol;GO:0012505//endomembrane system	GO:0004709//MAP kinase kinase kinase activity;GO:0004713//protein tyrosine kinase activity;GO:0005524//ATP binding;GO:0051020//GTPase binding	GO:0000186//activation of MAPKK activity;GO:0007178//transmembrane receptor protein serine/threonine kinase signaling pathway;GO:0009069//serine family amino acid metabolic process;GO:0009612//response to mechanical stimulus;GO:0009623//response to parasitic fungus;GO:0009814//defense response, incompatible interaction;GO:0019722//calcium-mediated signaling;GO:0046777//protein autophosphorylation…	gi|359497396|ref|XP_003635501.1|/0.0/PREDICTED: receptor-like cytosolic serine/threonine-protein kinase RBK1-like [Vitis vinifera]
VIT_208s0040g00010	1614	927.406	2602.46	1.48798	K04733;K04730	ko04064 NF-kappa B signaling pathway (Signal transduction)	GO:0005576//extracellular region;GO:0005886//plasma membrane;GO:0009506//plasmodesma;GO:0043680//filiform apparatus	GO:0004674//protein serine/threonine kinase activity;GO:0004715//non-membrane spanning protein tyrosine kinase activity;GO:0005524//ATP binding	GO:0000902//cell morphogenesis;GO:0006096//glycolytic process;GO:0006833//water transport;GO:0006972//hyperosmotic response;GO:0007030//Golgi organization;GO:0009069//serine family amino acid metabolic process;GO:0009266//response to temperature stimulus;GO:0009651//response to salt stress;GO:0009791//post-embryonic development;GO:0010193//response to ozone;GO:0010483//pollen tube reception;GO:00…	gi|359481330|ref|XP_002279218.2|/0.0/PREDICTED: receptor-like protein kinase FERONIA-like, partial [Vitis vinifera]
VIT_216s0050g01020	2630	101.175	252.006	1.31135	K04733;K04730	ko04064 NF-kappa B signaling pathway (Signal transduction)	GO:0005886//plasma membrane;GO:0009506//plasmodesma	GO:0004674//protein serine/threonine kinase activity;GO:0004715//non-membrane spanning protein tyrosine kinase activity;GO:0005524//ATP binding	GO:0006468//protein phosphorylation;GO:0009069//serine family amino acid metabolic process;GO:0009742//brassinosteroid mediated signaling pathway;GO:0009791//post-embryonic development;GO:0051510//regulation of unidimensional cell growth	gi|225464565|ref|XP_002272986.1|/0.0/PREDICTED: probable receptor-like protein kinase At5g24010 [Vitis vinifera]
VIT_208s0040g00050	3285.83	117.203	350.173	1.57401	K04733;K04730;K03145;K04733;K04730;K04733;K04730;K03145;K04733;K04730;K03145;K04733;K04730	ko04064 NF-kappa B signaling pathway (Signal transduction)	-	-	-	gi|359481328|ref|XP_002279159.2|/0.0/PREDICTED: uncharacterized protein LOC100249907 [Vitis vinifera]
VIT_210s0003g01990	3201	8.95666	82.3549	3.11518	K04733;K04733	ko04064 NF-kappa B signaling pathway (Signal transduction)	-	GO:0004674//protein serine/threonine kinase activity;GO:0004713//protein tyrosine kinase activity;GO:0005524//ATP binding;GO:0032440//2-alkenal reductase [NAD(P)] activity;GO:0004674//protein serine/threonine kinase activity;GO:0004713//protein tyrosine kinase activity;GO:0005524//ATP binding;GO:0032440//2-alkenal reductase [NAD(P)] activity	GO:0006468//protein phosphorylation;GO:0009069//serine family amino acid metabolic process;GO:0055114//oxidation-reduction process;GO:0006468//protein phosphorylation;GO:0009069//serine family amino acid metabolic process;GO:0055114//oxidation-reduction process	gi|359483554|ref|XP_002264139.2|/0.0/PREDICTED: probable LRR receptor-like serine/threonine-protein kinase At1g29720-like [Vitis vinifera]
VIT_200s0258g00040	2064	35.4241	1.78449	-3.90637	K04730	ko04064 NF-kappa B signaling pathway (Signal transduction)	-	GO:0004674//protein serine/threonine kinase activity;GO:0004713//protein tyrosine kinase activity;GO:0005524//ATP binding;GO:0030247//polysaccharide binding	GO:0006468//protein phosphorylation;GO:0009069//serine family amino acid metabolic process	gi|359495100|ref|XP_002265444.2|/0.0/PREDICTED: probable receptor-like protein kinase At5g39020-like [Vitis vinifera]
VIT_213s0067g01640	2024	34.7468	5.3855	-2.55818	K04730	ko04064 NF-kappa B signaling pathway (Signal transduction)	GO:0005886//plasma membrane;GO:0016023//cytoplasmic, membrane-bounded vesicle	GO:0004693//cyclin-dependent protein serine/threonine kinase activity;GO:0004715//non-membrane spanning protein tyrosine kinase activity;GO:0005524//ATP binding;GO:0030246//carbohydrate binding	GO:0006468//protein phosphorylation;GO:0007049//cell cycle;GO:0009069//serine family amino acid metabolic process;GO:0009738//abscisic acid-activated signaling pathway;GO:0009845//seed germination	gi|225448524|ref|XP_002273348.1|/0.0/PREDICTED: L-type lectin-domain containing receptor kinase V.9-like [Vitis vinifera]
VIT_212s0142g00760	2346	62.1208	13.655	-2.13597	K04730	ko04064 NF-kappa B signaling pathway (Signal transduction)	GO:0005886//plasma membrane;GO:0016021//integral component of membrane	GO:0004713//protein tyrosine kinase activity;GO:0005515//protein binding;GO:0005524//ATP binding	GO:0006468//protein phosphorylation	gi|147777440|emb|CAN73693.1|/0.0/hypothetical protein VITISV_008628 [Vitis vinifera]
VIT_213s0019g02300	2345	621.834	208.626	-1.57277	K04730;K04733	ko04064 NF-kappa B signaling pathway (Signal transduction)	GO:0016023//cytoplasmic, membrane-bounded vesicle	GO:0004709//MAP kinase kinase kinase activity;GO:0004713//protein tyrosine kinase activity;GO:0005524//ATP binding;GO:0030247//polysaccharide binding	GO:0000186//activation of MAPKK activity;GO:0007178//transmembrane receptor protein serine/threonine kinase signaling pathway;GO:0009069//serine family amino acid metabolic process	gi|296086176|emb|CBI31617.3|/0.0/unnamed protein product [Vitis vinifera]
VIT_206s0004g02640	3736.87	299.172	47.2301	-2.64739	K04730;K04733;K04730;K04733;K04733;K04730;K04733;K04730	ko04064 NF-kappa B signaling pathway (Signal transduction)	GO:0005886//plasma membrane;GO:0010008//endosome membrane;GO:0012505//endomembrane system;GO:0016023//cytoplasmic, membrane-bounded vesicle;GO:0005886//plasma membrane;GO:0010008//endosome membrane;GO:0012505//endomembrane system;GO:0016023//cytoplasmic, membrane-bounded vesicle;GO:0005886//plasma membrane;GO:0010008//endosome membrane;GO:0012505//endomembrane system;GO:0016023//cytoplasmic, memb…	GO:0004674//protein serine/threonine kinase activity;GO:0004713//protein tyrosine kinase activity;GO:0005524//ATP binding;GO:0008270//zinc ion binding;GO:0051020//GTPase binding;GO:0004674//protein serine/threonine kinase activity;GO:0004713//protein tyrosine kinase activity;GO:0005524//ATP binding;GO:0008270//zinc ion binding;GO:0051020//GTPase binding;GO:0004674//protein serine/threonine kinase…	GO:0006468//protein phosphorylation;GO:0007155//cell adhesion;GO:0009069//serine family amino acid metabolic process;GO:0010014//meristem initiation;GO:0010089//xylem development;GO:0010090//trichome morphogenesis;GO:0044036//cell wall macromolecule metabolic process;GO:0045010//actin nucleation;GO:0048765//root hair cell differentiation;GO:0071555//cell wall organization;GO:0006468//protein phos…	gi|297746278|emb|CBI16334.3|/0.0/unnamed protein product [Vitis vinifera]
VIT_211s0037g00690	4013	18.8784	2.12493	-2.82884	K04730;K13420	ko04064 NF-kappa B signaling pathway (Signal transduction)	GO:0005886//plasma membrane;GO:0016021//integral component of membrane	GO:0004709//MAP kinase kinase kinase activity;GO:0004713//protein tyrosine kinase activity;GO:0005515//protein binding;GO:0005524//ATP binding;GO:0032440//2-alkenal reductase [NAD(P)] activity	GO:0000186//activation of MAPKK activity;GO:0007178//transmembrane receptor protein serine/threonine kinase signaling pathway;GO:0009069//serine family amino acid metabolic process;GO:0055114//oxidation-reduction process	gi|359484864|ref|XP_002273966.2|/0.0/PREDICTED: probable LRR receptor-like serine/threonine-protein kinase At4g08850-like [Vitis vinifera]
VIT_219s0014g00810	3261	296.526	65.7266	-2.16309	K04733	ko04064 NF-kappa B signaling pathway (Signal transduction)	GO:0005886//plasma membrane	GO:0004674//protein serine/threonine kinase activity;GO:0004713//protein tyrosine kinase activity;GO:0005515//protein binding;GO:0005524//ATP binding	GO:0006468//protein phosphorylation;GO:0009069//serine family amino acid metabolic process	gi|302142856|emb|CBI20151.3|/0.0/unnamed protein product [Vitis vinifera]
VIT_210s0003g02020	2487	29.0743	2.67644	-3.17149	K04733	ko04064 NF-kappa B signaling pathway (Signal transduction)	-	GO:0004674//protein serine/threonine kinase activity;GO:0004713//protein tyrosine kinase activity;GO:0005524//ATP binding	GO:0006468//protein phosphorylation;GO:0009069//serine family amino acid metabolic process	gi|359483557|ref|XP_002264074.2|/0.0/PREDICTED: probable LRR receptor-like serine/threonine-protein kinase At1g29720-like [Vitis vinifera]
VIT_219s0014g00620	1512	55.5383	25.0564	-1.12908	K04733	ko04064 NF-kappa B signaling pathway (Signal transduction)	GO:0005886//plasma membrane;GO:0009506//plasmodesma	GO:0004674//protein serine/threonine kinase activity;GO:0004715//non-membrane spanning protein tyrosine kinase activity;GO:0005524//ATP binding;GO:0032440//2-alkenal reductase [NAD(P)] activity	GO:0006468//protein phosphorylation;GO:0009069//serine family amino acid metabolic process;GO:0055114//oxidation-reduction process	gi|302142841|emb|CBI20136.3|/1.03549E-170/unnamed protein product [Vitis vinifera]
VIT_210s0092g00590	3423	617.583	267.358	-1.20597	K04733	ko04064 NF-kappa B signaling pathway (Signal transduction)	GO:0005886//plasma membrane	GO:0004674//protein serine/threonine kinase activity;GO:0004715//non-membrane spanning protein tyrosine kinase activity;GO:0005515//protein binding;GO:0005524//ATP binding;GO:0032440//2-alkenal reductase [NAD(P)] activity	GO:0006468//protein phosphorylation;GO:0009069//serine family amino acid metabolic process;GO:0055114//oxidation-reduction process	gi|225444253|ref|XP_002273016.1|/0.0/PREDICTED: probable LRR receptor-like serine/threonine-protein kinase At1g56130-like [Vitis vinifera]
VIT_219s0014g00710	2213	164.423	66.5165	-1.29768	K04733	ko04064 NF-kappa B signaling pathway (Signal transduction)	GO:0005886//plasma membrane	GO:0004674//protein serine/threonine kinase activity;GO:0004713//protein tyrosine kinase activity;GO:0005524//ATP binding	GO:0006468//protein phosphorylation;GO:0009069//serine family amino acid metabolic process	gi|359493989|ref|XP_002283497.2|/0.0/PREDICTED: probable LRR receptor-like serine/threonine-protein kinase At1g53440-like [Vitis vinifera]
VIT_216s0039g01330	1982	70.7589	23.7891	-1.5481	K04733	ko04064 NF-kappa B signaling pathway (Signal transduction)	-	GO:0004674//protein serine/threonine kinase activity;GO:0004713//protein tyrosine kinase activity;GO:0005524//ATP binding	GO:0006468//protein phosphorylation;GO:0009069//serine family amino acid metabolic process	gi|359495104|ref|XP_002263133.2|/0.0/PREDICTED: probable serine/threonine-protein kinase At1g18390-like [Vitis vinifera]
VIT_219s0014g00520	3245	75.9389	21.8809	-1.76662	K04733	ko04064 NF-kappa B signaling pathway (Signal transduction)	GO:0005576//extracellular region;GO:0005886//plasma membrane;GO:0009506//plasmodesma	GO:0004674//protein serine/threonine kinase activity;GO:0004715//non-membrane spanning protein tyrosine kinase activity;GO:0005524//ATP binding;GO:0032440//2-alkenal reductase [NAD(P)] activity	GO:0006468//protein phosphorylation;GO:0009069//serine family amino acid metabolic process;GO:0055114//oxidation-reduction process	gi|359493985|ref|XP_002283578.2|/0.0/PREDICTED: probable leucine-rich repeat receptor-like serine/threonine-protein kinase At3g14840-like [Vitis vinifera]
VIT_219s0014g04530	2686	48.6795	20.1175	-1.24936	K04733;K04730	ko04064 NF-kappa B signaling pathway (Signal transduction)	-	GO:0004674//protein serine/threonine kinase activity;GO:0004713//protein tyrosine kinase activity;GO:0005524//ATP binding	GO:0006468//protein phosphorylation;GO:0009069//serine family amino acid metabolic process;GO:0048544//recognition of pollen	gi|302143157|emb|CBI20452.3|/0.0/unnamed protein product [Vitis vinifera]
VIT_207s0031g00630	1366	12.5707	88.0162	2.74845	K13648	ko00520 Amino sugar and nucleotide sugar metabolism (Carbohydrate metabolism)	GO:0005634//nucleus	-	-	gi|225438716|ref|XP_002282505.1|/0.0/PREDICTED: uncharacterized protein LOC100262755 [Vitis vinifera]
VIT_215s0048g00340	1942	74.8856	375.647	2.31711	K08679	ko00520 Amino sugar and nucleotide sugar metabolism (Carbohydrate metabolism)	GO:0005794//Golgi apparatus;GO:0016020//membrane	GO:0000166//nucleotide binding;GO:0050378//UDP-glucuronate 4-epimerase activity;GO:0050662//coenzyme binding	GO:0005982//starch metabolic process;GO:0005985//sucrose metabolic process;GO:0009225//nucleotide-sugar metabolic process	gi|225454014|ref|XP_002280967.1|/0.0/PREDICTED: UDP-glucuronate 4-epimerase 3-like [Vitis vinifera]
VIT_214s0108g01520	3464.67	292.09	1301.99	2.15386	K13648;K13648;K13648;K13648;K13648;K13648;K13648	ko00520 Amino sugar and nucleotide sugar metabolism (Carbohydrate metabolism)	GO:0005794//Golgi apparatus;GO:0005794//Golgi apparatus;GO:0005794//Golgi apparatus;GO:0005794//Golgi apparatus;GO:0005794//Golgi apparatus;GO:0005794//Golgi apparatus;GO:0005794//Golgi apparatus	GO:0047262//polygalacturonate 4-alpha-galacturonosyltransferase activity;GO:0047262//polygalacturonate 4-alpha-galacturonosyltransferase activity;GO:0047262//polygalacturonate 4-alpha-galacturonosyltransferase activity;GO:0047262//polygalacturonate 4-alpha-galacturonosyltransferase activity;GO:0047262//polygalacturonate 4-alpha-galacturonosyltransferase activity;GO:0047262//polygalacturonate 4-al…	GO:0005982//starch metabolic process;GO:0005985//sucrose metabolic process;GO:0009117//nucleotide metabolic process;GO:0016051//carbohydrate biosynthetic process;GO:0005982//starch metabolic process;GO:0005985//sucrose metabolic process;GO:0009117//nucleotide metabolic process;GO:0016051//carbohydrate biosynthetic process;GO:0005982//starch metabolic process;GO:0005985//sucrose metabolic process;…	gi|147819296|emb|CAN68963.1|/0.0/hypothetical protein VITISV_019278 [Vitis vinifera]
VIT_219s0014g00290	2991	997.569	4140.97	2.0528	K12450	ko00520 Amino sugar and nucleotide sugar metabolism (Carbohydrate metabolism)	GO:0005829//cytosol;GO:0009506//plasmodesma;GO:0009507//chloroplast	GO:0000166//nucleotide binding;GO:0008460//dTDP-glucose 4,6-dehydratase activity;GO:0008831//dTDP-4-dehydrorhamnose reductase activity;GO:0010280//UDP-L-rhamnose synthase activity;GO:0050377//UDP-glucose 4,6-dehydratase activity;GO:0050662//coenzyme binding	GO:0009744//response to sucrose;GO:0010192//mucilage biosynthetic process;GO:0010214//seed coat development;GO:0010224//response to UV-B;GO:0010253//UDP-rhamnose biosynthetic process;GO:0010315//auxin efflux;GO:0019872;GO:0030639//polyketide biosynthetic process;GO:0045226//extracellular polysaccharide biosynthetic process;GO:0051555//flavonol biosynthetic process	gi|225461808|ref|XP_002285634.1|/0.0/PREDICTED: probable rhamnose biosynthetic enzyme 1 [Vitis vinifera]
VIT_200s2240g00010	1365	34.3209	112.551	1.69553	K08679	ko00520 Amino sugar and nucleotide sugar metabolism (Carbohydrate metabolism)	GO:0005768//endosome;GO:0005794//Golgi apparatus;GO:0005802//trans-Golgi network;GO:0016020//membrane	GO:0000166//nucleotide binding;GO:0050378//UDP-glucuronate 4-epimerase activity;GO:0050662//coenzyme binding	GO:0005982//starch metabolic process;GO:0005985//sucrose metabolic process;GO:0009225//nucleotide-sugar metabolic process;GO:0016036//cellular response to phosphate starvation;GO:0019375//galactolipid biosynthetic process;GO:0042631//cellular response to water deprivation	gi|147771058|emb|CAN60968.1|/0.0/hypothetical protein VITISV_008097 [Vitis vinifera]
VIT_217s0000g04960	2590	236.279	747.332	1.65868	K13648	ko00520 Amino sugar and nucleotide sugar metabolism (Carbohydrate metabolism)	GO:0005794//Golgi apparatus	GO:0047262//polygalacturonate 4-alpha-galacturonosyltransferase activity	GO:0005982//starch metabolic process;GO:0005985//sucrose metabolic process;GO:0009117//nucleotide metabolic process	gi|225456536|ref|XP_002262858.1|/0.0/PREDICTED: probable galacturonosyltransferase 11-like [Vitis vinifera]
VIT_217s0000g05030	1816	879.095	2545.53	1.53321	K13379	ko00520 Amino sugar and nucleotide sugar metabolism (Carbohydrate metabolism)	GO:0005794//Golgi apparatus	GO:0005515//protein binding;GO:0008466//glycogenin glucosyltransferase activity;GO:0052691//UDP-arabinopyranose mutase activity	GO:0030244//cellulose biosynthetic process	gi|225456550|ref|XP_002263490.1|/0.0/PREDICTED: UDP-arabinopyranose mutase 1 [Vitis vinifera]
VIT_200s0216g00020	2432	410.52	992.093	1.27175	K13648	ko00520 Amino sugar and nucleotide sugar metabolism (Carbohydrate metabolism)	GO:0005739//mitochondrion;GO:0005768//endosome;GO:0005794//Golgi apparatus;GO:0005802//trans-Golgi network	GO:0047262//polygalacturonate 4-alpha-galacturonosyltransferase activity	GO:0005982//starch metabolic process;GO:0005985//sucrose metabolic process;GO:0009117//nucleotide metabolic process;GO:0010289//homogalacturonan biosynthetic process	gi|359495836|ref|XP_002273962.2|/0.0/PREDICTED: galacturonosyltransferase 8-like [Vitis vinifera]
VIT_200s0475g00010	1443	71.2102	166.961	1.2222	K13648	ko00520 Amino sugar and nucleotide sugar metabolism (Carbohydrate metabolism)	GO:0005794//Golgi apparatus	GO:0047262//polygalacturonate 4-alpha-galacturonosyltransferase activity	GO:0005982//starch metabolic process;GO:0005985//sucrose metabolic process;GO:0009117//nucleotide metabolic process;GO:0016051//carbohydrate biosynthetic process	gi|296084717|emb|CBI25859.3|/0.0/unnamed protein product [Vitis vinifera]
VIT_213s0064g00450	2459.41	7474.41	17365.5	1.21612	K00326;K00326;K00326;K00326;K00326;K00326;K00326;K00326;K00326	ko00520 Amino sugar and nucleotide sugar metabolism (Carbohydrate metabolism)	GO:0005829//cytosol;GO:0005829//cytosol;GO:0005829//cytosol;GO:0005829//cytosol;GO:0005829//cytosol;GO:0005829//cytosol;GO:0005829//cytosol;GO:0005829//cytosol;GO:0005829//cytosol	GO:0020037//heme binding;GO:0046872//metal ion binding;GO:0020037//heme binding;GO:0046872//metal ion binding;GO:0020037//heme binding;GO:0046872//metal ion binding;GO:0020037//heme binding;GO:0046872//metal ion binding;GO:0020037//heme binding;GO:0046872//metal ion binding;GO:0020037//heme binding;GO:0046872//metal ion binding;GO:0020037//heme binding;GO:0046872//metal ion binding;GO:0020037//he…	GO:0010311//lateral root formation;GO:0010311//lateral root formation;GO:0010311//lateral root formation;GO:0010311//lateral root formation;GO:0010311//lateral root formation;GO:0010311//lateral root formation;GO:0010311//lateral root formation;GO:0010311//lateral root formation;GO:0010311//lateral root formation	gi|297736295|emb|CBI24933.3|/3.6643E-105/unnamed protein product [Vitis vinifera]
VIT_205s0094g00220	1808	44.3342	9.32679	-2.17623	K01183	ko00520 Amino sugar and nucleotide sugar metabolism (Carbohydrate metabolism)	GO:0005576//extracellular region;GO:0005618//cell wall	GO:0004568//chitinase activity;GO:0008061//chitin binding	GO:0002679//respiratory burst involved in defense response;GO:0005975//carbohydrate metabolic process;GO:0006032//chitin catabolic process;GO:0009626//plant-type hypersensitive response;GO:0010167//response to nitrate;GO:0010200//response to chitin;GO:0010262//somatic embryogenesis;GO:0015706//nitrate transport;GO:0015824//proline transport;GO:0016998//cell wall macromolecule catabolic process	gi|225434050|ref|XP_002274537.1|/1.76409E-148/PREDICTED: endochitinase PR4 [Vitis vinifera]
VIT_202s0012g02190	4678.02	264.46	1067.98	2.01122	K00770;K00770	ko00520 Amino sugar and nucleotide sugar metabolism (Carbohydrate metabolism)	GO:0005768//endosome;GO:0005783//endoplasmic reticulum;GO:0005802//trans-Golgi network;GO:0005886//plasma membrane;GO:0030173//integral component of Golgi membrane;GO:0005768//endosome;GO:0005783//endoplasmic reticulum;GO:0005802//trans-Golgi network;GO:0005886//plasma membrane;GO:0030173//integral component of Golgi membrane	GO:0016760//cellulose synthase (UDP-forming) activity;GO:0051753//mannan synthase activity;GO:0016760//cellulose synthase (UDP-forming) activity;GO:0051753//mannan synthase activity	GO:0005982//starch metabolic process;GO:0005985//sucrose metabolic process;GO:0006011//UDP-glucose metabolic process;GO:0009409//response to cold;GO:0009832//plant-type cell wall biogenesis;GO:0030244//cellulose biosynthetic process;GO:0048767//root hair elongation;GO:0005982//starch metabolic process;GO:0005985//sucrose metabolic process;GO:0006011//UDP-glucose metabolic process;GO:0009409//resp…	gi|225454783|ref|XP_002274896.1|/0.0/PREDICTED: cellulose synthase-like protein D3-like [Vitis vinifera]
VIT_216s0039g02020	4355.97	993.873	3689.38	1.89159	K00770;K00770	ko00520 Amino sugar and nucleotide sugar metabolism (Carbohydrate metabolism)	GO:0005768//endosome;GO:0005783//endoplasmic reticulum;GO:0005802//trans-Golgi network;GO:0005886//plasma membrane;GO:0030173//integral component of Golgi membrane;GO:0005768//endosome;GO:0005783//endoplasmic reticulum;GO:0005802//trans-Golgi network;GO:0005886//plasma membrane;GO:0030173//integral component of Golgi membrane	GO:0016760//cellulose synthase (UDP-forming) activity;GO:0051753//mannan synthase activity;GO:0016760//cellulose synthase (UDP-forming) activity;GO:0051753//mannan synthase activity	GO:0005982//starch metabolic process;GO:0005985//sucrose metabolic process;GO:0006011//UDP-glucose metabolic process;GO:0009409//response to cold;GO:0009832//plant-type cell wall biogenesis;GO:0030244//cellulose biosynthetic process;GO:0048767//root hair elongation;GO:0005982//starch metabolic process;GO:0005985//sucrose metabolic process;GO:0006011//UDP-glucose metabolic process;GO:0009409//resp…	gi|225454783|ref|XP_002274896.1|/0.0/PREDICTED: cellulose synthase-like protein D3-like [Vitis vinifera]
VIT_218s0001g03790	3774.91	214.984	558.963	1.37597	K00770;K00770;K00770	ko00520 Amino sugar and nucleotide sugar metabolism (Carbohydrate metabolism)	GO:0005634//nucleus;GO:0009536//plastid;GO:0005634//nucleus;GO:0009536//plastid;GO:0005634//nucleus;GO:0009536//plastid	GO:0005515//protein binding;GO:0008142//oxysterol binding;GO:0035091//phosphatidylinositol binding;GO:0005515//protein binding;GO:0008142//oxysterol binding;GO:0035091//phosphatidylinositol binding;GO:0005515//protein binding;GO:0008142//oxysterol binding;GO:0035091//phosphatidylinositol binding	GO:0000165//MAPK cascade;GO:0006612//protein targeting to membrane;GO:0008202//steroid metabolic process;GO:0009409//response to cold;GO:0009723//response to ethylene;GO:0009738//abscisic acid-activated signaling pathway;GO:0009862//systemic acquired resistance, salicylic acid mediated signaling pathway;GO:0009867//jasmonic acid mediated signaling pathway;GO:0010200//response to chitin;GO:0010363…	gi|225459463|ref|XP_002284383.1|/0.0/PREDICTED: oxysterol-binding protein-related protein 1C [Vitis vinifera]
VIT_202s0025g01850	2748.03	25.0213	4.26548	-2.39207	K00770;K10999;K10999;K10999;K10999;K00770	ko00520 Amino sugar and nucleotide sugar metabolism (Carbohydrate metabolism)	GO:0016021//integral component of membrane;GO:0016021//integral component of membrane;GO:0016021//integral component of membrane;GO:0016021//integral component of membrane	GO:0016760//cellulose synthase (UDP-forming) activity;GO:0016760//cellulose synthase (UDP-forming) activity;GO:0016760//cellulose synthase (UDP-forming) activity;GO:0016760//cellulose synthase (UDP-forming) activity	GO:0005982//starch metabolic process;GO:0005985//sucrose metabolic process;GO:0006011//UDP-glucose metabolic process;GO:0030244//cellulose biosynthetic process;GO:0005982//starch metabolic process;GO:0005985//sucrose metabolic process;GO:0006011//UDP-glucose metabolic process;GO:0030244//cellulose biosynthetic process;GO:0005982//starch metabolic process;GO:0005985//sucrose metabolic process;GO:0…	gi|225426270|ref|XP_002264890.1|/0.0/PREDICTED: cellulose synthase-like protein G3 [Vitis vinifera]
VIT_216s0039g00520	4293.5	136.12	370.37	1.43995	K14326;K19036;K19036;K14326;K19036;K14326;K19036	ko03013 RNA transport ( Translation)	GO:0009570//chloroplast stroma;GO:0009941//chloroplast envelope;GO:0009570//chloroplast stroma;GO:0009941//chloroplast envelope;GO:0009570//chloroplast stroma;GO:0009941//chloroplast envelope;GO:0009570//chloroplast stroma;GO:0009941//chloroplast envelope	GO:0003677//DNA binding;GO:0004386//helicase activity;GO:0005524//ATP binding;GO:0003677//DNA binding;GO:0004386//helicase activity;GO:0005524//ATP binding;GO:0003677//DNA binding;GO:0004386//helicase activity;GO:0005524//ATP binding;GO:0003677//DNA binding;GO:0004386//helicase activity;GO:0005524//ATP binding	GO:0015996//chlorophyll catabolic process;GO:0015996//chlorophyll catabolic process;GO:0015996//chlorophyll catabolic process;GO:0015996//chlorophyll catabolic process	gi|225454589|ref|XP_002264216.1|/0.0/PREDICTED: DNA-binding protein SMUBP-2 [Vitis vinifera]
VIT_218s0001g06150	1185	157.641	1061.86	2.74706	K14299	ko03013 RNA transport (Translation)	GO:0009505//plant-type cell wall	-	GO:0009741//response to brassinosteroid	gi|225459247|ref|XP_002285762.1|/4.85804E-170/PREDICTED: uncharacterized protein LOC100259041 [Vitis vinifera]
VIT_218s0001g06170	1153	177.003	902.247	2.3457	K14299	ko03013 RNA transport (Translation)	GO:0009505//plant-type cell wall	-	GO:0009741//response to brassinosteroid	gi|225459245|ref|XP_002285761.1|/3.74373E-157/PREDICTED: uncharacterized protein LOC100264214 [Vitis vinifera]
VIT_202s0025g04330	899	7045.94	24128.7	1.7758	K14297	ko03013 RNA transport (Translation)	GO:0005576//extracellular region;GO:0005773//vacuole	-	GO:0006952//defense response;GO:0009607//response to biotic stimulus	gi|2213852|gb|AAB61590.1|/4.11157E-113/VVTL1 [Vitis vinifera]
VIT_218s0001g06020	1114	13.2979	42.8722	1.64386	K14299	ko03013 RNA transport (Translation)	GO:0009505//plant-type cell wall	-	GO:0009741//response to brassinosteroid	gi|225459264|ref|XP_002285777.1|/5.27077E-157/PREDICTED: uncharacterized protein LOC100255713 [Vitis vinifera]
VIT_218s0001g11930	1478	532.092	1547.53	1.53912	K14297	ko03013 RNA transport (Translation)	GO:0005618//cell wall;GO:0005773//vacuole;GO:0048046//apoplast	-	GO:0000165//MAPK cascade;GO:0002679//respiratory burst involved in defense response;GO:0006612//protein targeting to membrane;GO:0009595//detection of biotic stimulus;GO:0009615//response to virus;GO:0009697//salicylic acid biosynthetic process;GO:0009862//systemic acquired resistance, salicylic acid mediated signaling pathway;GO:0009867//jasmonic acid mediated signaling pathway;GO:0009965//leaf …	gi|225458384|ref|XP_002283480.1|/8.36707E-130/PREDICTED: pathogenesis-related protein 5 [Vitis vinifera]
VIT_215s0021g00980	6195.21	1089.78	2989.37	1.45528	K03260;K03260;K03260;K03260	ko03013 RNA transport (Translation)	GO:0005840//ribosome;GO:0005840//ribosome;GO:0005840//ribosome;GO:0005840//ribosome	GO:0003677//DNA binding;GO:0003743//translation initiation factor activity;GO:0005515//protein binding;GO:0003677//DNA binding;GO:0003743//translation initiation factor activity;GO:0005515//protein binding;GO:0003677//DNA binding;GO:0003743//translation initiation factor activity;GO:0005515//protein binding;GO:0003677//DNA binding;GO:0003743//translation initiation factor activity;GO:0005515//pro…	GO:0000226//microtubule cytoskeleton organization;GO:0000911//cytokinesis by cell plate formation;GO:0006446//regulation of translational initiation;GO:0009615//response to virus;GO:0009630//gravitropism;GO:0009737//response to abscisic acid;GO:0016070//RNA metabolic process;GO:0000226//microtubule cytoskeleton organization;GO:0000911//cytokinesis by cell plate formation;GO:0006446//regulation of…	gi|359489318|ref|XP_002269466.2|/0.0/PREDICTED: eukaryotic translation initiation factor 4G-like [Vitis vinifera]
VIT_215s0048g02270	3899.99	528.397	1331.26	1.33208	K13126;K00162;K00162;K13126;K00162;K13126;K13126;K00162;K00162;K13126;K13126;K00162;K00162;K13126;K00162;K13126;K00162;K13126;K02437	ko03013 RNA transport (Translation)	GO:0005667//transcription factor complex;GO:0005667//transcription factor complex;GO:0005667//transcription factor complex;GO:0005667//transcription factor complex	GO:0003677//DNA binding;GO:0005515//protein binding;GO:0003677//DNA binding;GO:0005515//protein binding;GO:0003677//DNA binding;GO:0005515//protein binding;GO:0003677//DNA binding;GO:0003700//transcription factor activity, sequence-specific DNA binding;GO:0005516//calmodulin binding;GO:0003677//DNA binding;GO:0005515//protein binding;GO:0003677//DNA binding;GO:0005515//protein binding;GO:0003677/…	GO:0006355//regulation of transcription, DNA-templated;GO:0006952//defense response;GO:0007275//multicellular organism development;GO:0006355//regulation of transcription, DNA-templated;GO:0006952//defense response;GO:0007275//multicellular organism development;GO:0006355//regulation of transcription, DNA-templated;GO:0006952//defense response;GO:0007275//multicellular organism development;GO:000…	gi|225453680|ref|XP_002268892.1|/0.0/PREDICTED: uncharacterized protein LOC100252386 [Vitis vinifera]
VIT_204s0069g00870	9160	367.751	921.568	1.3239	K09291;K11498	ko03013 RNA transport (Translation)	GO:0009506//plasmodesma	GO:0008184//glycogen phosphorylase activity	GO:0005975//carbohydrate metabolic process	gi|359476456|ref|XP_002272127.2|/0.0/PREDICTED: uncharacterized protein LOC100260617 [Vitis vinifera]
VIT_202s0012g01040	4075.64	35.4032	79.8229	1.15905	K13126;K02437;K00162;K13126;K05941;K00162;K13126;K05941;K02437	ko03013 RNA transport (Translation)	-	GO:0003677//DNA binding;GO:0003677//DNA binding;GO:0003677//DNA binding	GO:0006355//regulation of transcription, DNA-templated;GO:0006355//regulation of transcription, DNA-templated;GO:0006355//regulation of transcription, DNA-templated	gi|359474569|ref|XP_002280894.2|/0.0/PREDICTED: NAC domain-containing protein 68-like [Vitis vinifera]
VIT_216s0050g01010	1174.74	137.465	56.8045	-1.26583	K13126;K12831;K12831;K13126	ko03013 RNA transport (Translation)	-	GO:0003676//nucleic acid binding;GO:0004674//protein serine/threonine kinase activity;GO:0005524//ATP binding;GO:0003676//nucleic acid binding;GO:0004674//protein serine/threonine kinase activity;GO:0005524//ATP binding	GO:0006468//protein phosphorylation;GO:0009069//serine family amino acid metabolic process;GO:0006468//protein phosphorylation;GO:0009069//serine family amino acid metabolic process	gi|302143805|emb|CBI22666.3|/6.27129E-106/unnamed protein product [Vitis vinifera]
VIT_209s0054g01620	2861	160.014	65.76	-1.27496	K14317;K12741;K01940;K14491	ko03013 RNA transport (Translation)	GO:0000785//chromatin	GO:0003677//DNA binding;GO:0003682//chromatin binding	-	gi|359483278|ref|XP_002269813.2|/0.0/PREDICTED: uncharacterized protein LOC100244458 [Vitis vinifera]
VIT_202s0012g01420	5492	169.486	68.4787	-1.29972	K13126	ko03013 RNA transport (Translation)	GO:0005840//ribosome;GO:0009570//chloroplast stroma;GO:0009579//thylakoid	GO:0000166//nucleotide binding;GO:0003723//RNA binding	GO:0006364//rRNA processing;GO:0009902//chloroplast relocation;GO:0010027//thylakoid membrane organization;GO:0015979//photosynthesis;GO:0015995//chlorophyll biosynthetic process;GO:0019288//isopentenyl diphosphate biosynthetic process, methylerythritol 4-phosphate pathway;GO:0042793//transcription from plastid promoter	gi|225427185|ref|XP_002279685.1|/3.34082E-110/PREDICTED: 29 kDa ribonucleoprotein B, chloroplastic [Vitis vinifera]
VIT_218s0001g06590	1786.24	126.06	49.3517	-1.34202	K13126;K13201;K13126;K13201;K13126;K13201	ko03013 RNA transport (Translation)	GO:0005634//nucleus;GO:0009570//chloroplast stroma;GO:0030529//intracellular ribonucleoprotein complex;GO:0005634//nucleus;GO:0009570//chloroplast stroma;GO:0030529//intracellular ribonucleoprotein complex;GO:0005634//nucleus;GO:0009570//chloroplast stroma;GO:0030529//intracellular ribonucleoprotein complex	GO:0000166//nucleotide binding;GO:0003723//RNA binding;GO:0000166//nucleotide binding;GO:0003723//RNA binding;GO:0000166//nucleotide binding;GO:0003723//RNA binding	GO:0000398//mRNA splicing, via spliceosome;GO:0000398//mRNA splicing, via spliceosome;GO:0000398//mRNA splicing, via spliceosome	gi|225459201|ref|XP_002285735.1|/7.81856E-144/PREDICTED: 31 kDa ribonucleoprotein, chloroplastic [Vitis vinifera]
VIT_203s0017g01210	1456	1006.54	170.825	-2.55448	K14299	ko03013 RNA transport (Translation)	GO:0005794//Golgi apparatus;GO:0005829//cytosol;GO:0009505//plant-type cell wall;GO:0009506//plasmodesma;GO:0009507//chloroplast;GO:0016020//membrane	-	GO:0046685//response to arsenic-containing substance	gi|225462882|ref|XP_002273316.1|/1.44393E-179/PREDICTED: uncharacterized protein LOC100263311 [Vitis vinifera]
VIT_203s0038g03410	1672	25.0369	2.7177	-2.94269	K13126	ko03013 RNA transport (Translation)	-	GO:0003677//DNA binding	GO:0000165//MAPK cascade;GO:0006355//regulation of transcription, DNA-templated;GO:0009814//defense response, incompatible interaction;GO:0009965//leaf morphogenesis;GO:0010200//response to chitin;GO:0045792//negative regulation of cell size;GO:0048281//inflorescence morphogenesis	gi|225428195|ref|XP_002281816.1|/1.78364E-150/PREDICTED: putative NAC domain-containing protein 94 [Vitis vinifera]
VIT_217s0000g07890	1555	53.5484	10.912	-2.23188	K04392	ko04010 MAPK signaling pathway (Signal transduction)	GO:0005737//cytoplasm;GO:0005886//plasma membrane	GO:0003924//GTPase activity;GO:0005515//protein binding;GO:0005525//GTP binding	GO:0007264//small GTPase mediated signal transduction;GO:0015031//protein transport	gi|225457107|ref|XP_002283394.1|/1.67126E-109/PREDICTED: rac-like GTP-binding protein 3 [Vitis vinifera]
VIT_216s0098g01650	1846.61	171.29	17.4386	-3.25095	K04457;K17499;K14803;K04457;K14803;K04457;K17499;K14803;K17506;K04457;K14803;K14803;K04457	ko04010 MAPK signaling pathway (Signal transduction)	GO:0005730//nucleolus;GO:0005739//mitochondrion;GO:0008287//protein serine/threonine phosphatase complex;GO:0009570//chloroplast stroma;GO:0009579//thylakoid;GO:0016021//integral component of membrane;GO:0005730//nucleolus;GO:0005739//mitochondrion;GO:0008287//protein serine/threonine phosphatase complex;GO:0009570//chloroplast stroma;GO:0009579//thylakoid;GO:0005730//nucleolus;GO:0005739//mitoch…	GO:0004722//protein serine/threonine phosphatase activity;GO:0046872//metal ion binding;GO:0004722//protein serine/threonine phosphatase activity;GO:0046872//metal ion binding;GO:0004722//protein serine/threonine phosphatase activity;GO:0046872//metal ion binding;GO:0004722//protein serine/threonine phosphatase activity;GO:0046872//metal ion binding;GO:0004722//protein serine/threonine phosphatas…	GO:0006470//protein dephosphorylation;GO:0009767//photosynthetic electron transport chain;GO:0080005//photosystem stoichiometry adjustment;GO:0006470//protein dephosphorylation;GO:0009767//photosynthetic electron transport chain;GO:0080005//photosystem stoichiometry adjustment;GO:0006470//protein dephosphorylation;GO:0009767//photosynthetic electron transport chain;GO:0080005//photosystem stoichi…	gi|302143922|emb|CBI23027.3|/0.0/unnamed protein product [Vitis vinifera]
VIT_200s0567g00010	3212.15	173.274	457.293	1.39687	K11229;K04421;K04421;K11229;K11229;K04421;K11229;K04421;K04421;K11229;K11229;K04421	ko04011 MAPK signaling pathway - yeast (Signal transduction)	GO:0005739//mitochondrion;GO:0005886//plasma membrane;GO:0009536//plastid;GO:0005886//plasma membrane;GO:0005886//plasma membrane;GO:0005886//plasma membrane;GO:0005886//plasma membrane;GO:0005739//mitochondrion;GO:0005886//plasma membrane;GO:0009536//plastid	GO:0004674//protein serine/threonine kinase activity;GO:0004713//protein tyrosine kinase activity;GO:0005524//ATP binding;GO:0004674//protein serine/threonine kinase activity;GO:0004713//protein tyrosine kinase activity;GO:0005524//ATP binding;GO:0004674//protein serine/threonine kinase activity;GO:0004713//protein tyrosine kinase activity;GO:0005524//ATP binding;GO:0004674//protein serine/threon…	GO:0009069//serine family amino acid metabolic process;GO:0046777//protein autophosphorylation;GO:0009069//serine family amino acid metabolic process;GO:0046777//protein autophosphorylation;GO:0009069//serine family amino acid metabolic process;GO:0046777//protein autophosphorylation;GO:0009069//serine family amino acid metabolic process;GO:0046777//protein autophosphorylation;GO:0009069//serine …	gi|225470467|ref|XP_002263088.1|/0.0/PREDICTED: uncharacterized protein LOC100245919 [Vitis vinifera]
VIT_209s0002g03510	2770	247.202	1251.47	2.33696	K15174	ko04011 MAPK signaling pathway - yeast (Signal transduction)	GO:0005634//nucleus;GO:0005739//mitochondrion;GO:0009536//plastid	-	GO:0000085;GO:0009640//photomorphogenesis;GO:0009910//negative regulation of flower development;GO:0010388//cullin deneddylation;GO:0016567//protein ubiquitination;GO:0016571//histone methylation;GO:0016579//protein deubiquitination;GO:0045893//positive regulation of transcription, DNA-templated	gi|359482895|ref|XP_002278075.2|/0.0/PREDICTED: RNA polymerase II-associated factor 1 homolog [Vitis vinifera]
VIT_200s0199g00190	983.92	262.878	122.042	-1.10311	K06630;K06630	ko04011 MAPK signaling pathway - yeast (Signal transduction)	GO:0005634//nucleus;GO:0005829//cytosol;GO:0005886//plasma membrane;GO:0009505//plant-type cell wall;GO:0009941//chloroplast envelope;GO:0005634//nucleus;GO:0005829//cytosol;GO:0005886//plasma membrane;GO:0009505//plant-type cell wall;GO:0009941//chloroplast envelope	GO:0005524//ATP binding;GO:0016818//hydrolase activity, acting on acid anhydrides, in phosphorus-containing anhydrides;GO:0019904//protein domain specific binding;GO:0045309//protein phosphorylated amino acid binding;GO:0005524//ATP binding;GO:0016818//hydrolase activity, acting on acid anhydrides, in phosphorus-containing anhydrides;GO:0019904//protein domain specific binding;GO:0045309//protein…	GO:0006094//gluconeogenesis;GO:0006096//glycolytic process;GO:0006355//regulation of transcription, DNA-templated;GO:0009407//toxin catabolic process;GO:0009651//response to salt stress;GO:0009686//gibberellin biosynthetic process;GO:0009740//gibberellic acid mediated signaling pathway;GO:0009742//brassinosteroid mediated signaling pathway;GO:0016310//phosphorylation;GO:0032880//regulation of pro…	gi|225469784|ref|XP_002274546.1|/6.6082E-146/PREDICTED: 14-3-3-like protein GF14 kappa [Vitis vinifera]
VIT_208s0040g01540	4388	17.4202	75.9098	2.08485	K13420	ko04016 MAPK signaling pathway - plant (Signal transduction)	GO:0016021//integral component of membrane;GO:0043231//intracellular membrane-bounded organelle;GO:0044444//cytoplasmic part	GO:0004709//MAP kinase kinase kinase activity;GO:0004713//protein tyrosine kinase activity;GO:0004721//phosphoprotein phosphatase activity;GO:0005515//protein binding;GO:0005524//ATP binding;GO:0032440//2-alkenal reductase [NAD(P)] activity	GO:0000186//activation of MAPKK activity;GO:0006470//protein dephosphorylation;GO:0007178//transmembrane receptor protein serine/threonine kinase signaling pathway;GO:0009069//serine family amino acid metabolic process;GO:0009556//microsporogenesis;GO:0010234//anther wall tapetum cell fate specification;GO:0055114//oxidation-reduction process	gi|359481543|ref|XP_002276746.2|/0.0/PREDICTED: leucine-rich repeat receptor protein kinase EXS-like [Vitis vinifera]
VIT_212s0059g00880	2476	122.592	356.719	1.53616	K13424;K13424;K13424	ko04016 MAPK signaling pathway - plant (Signal transduction)	GO:0005667//transcription factor complex;GO:0005667//transcription factor complex;GO:0005667//transcription factor complex	GO:0003700//transcription factor activity, sequence-specific DNA binding;GO:0043565//sequence-specific DNA binding;GO:0003700//transcription factor activity, sequence-specific DNA binding;GO:0043565//sequence-specific DNA binding;GO:0003700//transcription factor activity, sequence-specific DNA binding;GO:0043565//sequence-specific DNA binding	GO:0006355//regulation of transcription, DNA-templated;GO:0006355//regulation of transcription, DNA-templated;GO:0006355//regulation of transcription, DNA-templated	gi|359485613|ref|XP_002269696.2|/0.0/PREDICTED: WRKY transcription factor 6-like [Vitis vinifera]
VIT_202s0025g00420	1516.73	40.2876	115.976	1.51109	K13426;K13425;K13426;K13425	ko04016 MAPK signaling pathway - plant (Signal transduction)	GO:0005667//transcription factor complex;GO:0005667//transcription factor complex	GO:0003700//transcription factor activity, sequence-specific DNA binding;GO:0043565//sequence-specific DNA binding;GO:0003700//transcription factor activity, sequence-specific DNA binding;GO:0043565//sequence-specific DNA binding	GO:0006355//regulation of transcription, DNA-templated;GO:0050896//response to stimulus;GO:0008152//metabolic process;GO:0050794//regulation of cellular process;GO:0050896//response to stimulus	gi|225426142|ref|XP_002278221.1|/8.63213E-169/PREDICTED: WRKY transcription factor 22-like [Vitis vinifera]
VIT_215s0046g01920	2504	4.35397	41.1852	3.0714	K13447;K13447	ko04016 MAPK signaling pathway - plant (Signal transduction)	GO:0005739//mitochondrion;GO:0005886//plasma membrane;GO:0016021//integral component of membrane;GO:0005739//mitochondrion;GO:0005886//plasma membrane;GO:0016021//integral component of membrane	GO:0000293//ferric-chelate reductase activity;GO:0016174//NAD(P)H oxidase activity;GO:0000293//ferric-chelate reductase activity;GO:0016174//NAD(P)H oxidase activity	GO:0009617//response to bacterium;GO:0015688//iron chelate transport;GO:0033215//iron assimilation by reduction and transport;GO:0033216;GO:0055114//oxidation-reduction process;GO:0009617//response to bacterium;GO:0015688//iron chelate transport;GO:0033215//iron assimilation by reduction and transport;GO:0033216;GO:0055114//oxidation-reduction process	gi|359489816|ref|XP_002275942.2|/0.0/PREDICTED: ferric reduction oxidase 2 [Vitis vinifera]
VIT_205s0049g00510	1264	3672.87	15917.1	2.11541	K14516	ko04016 MAPK signaling pathway - plant (Signal transduction)	GO:0005667//transcription factor complex	GO:0003677//DNA binding;GO:0003700//transcription factor activity, sequence-specific DNA binding	GO:0006355//regulation of transcription, DNA-templated;GO:0006952//defense response;GO:0009873//ethylene-activated signaling pathway	gi|359477725|ref|XP_002281052.2|/1.1265E-80/PREDICTED: LOW QUALITY PROTEIN: ethylene-responsive transcription factor 1B [Vitis vinifera]
VIT_212s0028g01845	795	14.2298	1.60587	-2.73841	K13420	ko04016 MAPK signaling pathway - plant (Signal transduction)	GO:0016021//integral component of membrane	GO:0003677//DNA binding;GO:0004674//protein serine/threonine kinase activity;GO:0005524//ATP binding;GO:0016491//oxidoreductase activity	GO:0006468//protein phosphorylation;GO:0009069//serine family amino acid metabolic process;GO:0055114//oxidation-reduction process	gi|302143445|emb|CBI22006.3|/7.34544E-70/unnamed protein product [Vitis vinifera]
VIT_207s0005g01520	1567.76	144.328	35.2682	-2.01397	K13425;K13425	ko04016 MAPK signaling pathway - plant (Signal transduction)	GO:0005667//transcription factor complex;GO:0005667//transcription factor complex	GO:0003700//transcription factor activity, sequence-specific DNA binding;GO:0043565//sequence-specific DNA binding;GO:0003700//transcription factor activity, sequence-specific DNA binding;GO:0043565//sequence-specific DNA binding	GO:0006355//regulation of transcription, DNA-templated;GO:0006355//regulation of transcription, DNA-templated	gi|297743986|emb|CBI36956.3|/3.58567E-113/unnamed protein product [Vitis vinifera]
VIT_202s0025g01280	3763	194.384	63.8251	-1.59737	K13425;K16225;K13424	ko04016 MAPK signaling pathway - plant (Signal transduction)	GO:0005667//transcription factor complex	GO:0003700//transcription factor activity, sequence-specific DNA binding;GO:0043565//sequence-specific DNA binding	GO:0006355//regulation of transcription, DNA-templated	gi|225426000|ref|XP_002272720.1|/0.0/PREDICTED: probable WRKY transcription factor 41 [Vitis vinifera]
VIT_200s0207g00130	666	51.2308	8.46191	-2.51339	K13449	ko04016 MAPK signaling pathway - plant (Signal transduction)	GO:0005576//extracellular region	-	-	gi|225468210|ref|XP_002262744.1|/5.77082E-97/PREDICTED: STS14 protein [Vitis vinifera]
VIT_207s0197g00080	2183.74	426.975	97.9967	-2.11635	K14498;K2;K14498;K2	ko04016 MAPK signaling pathway - plant (Signal transduction)	GO:0005634//nucleus;GO:0005829//cytosol;GO:0005634//nucleus;GO:0005829//cytosol	GO:0004674//protein serine/threonine kinase activity;GO:0004713//protein tyrosine kinase activity;GO:0005524//ATP binding;GO:0004674//protein serine/threonine kinase activity;GO:0004713//protein tyrosine kinase activity;GO:0005515//protein binding;GO:0005524//ATP binding	GO:0005985//sucrose metabolic process;GO:0006468//protein phosphorylation;GO:0006636//unsaturated fatty acid biosynthetic process;GO:0009069//serine family amino acid metabolic process;GO:0009414//response to water deprivation;GO:0009651//response to salt stress;GO:0009739//response to gibberellin;GO:0009789//positive regulation of abscisic acid-activated signaling pathway;GO:0010029//regulation …	gi|225470483|ref|XP_002264172.1|/5.85793E-157/PREDICTED: serine/threonine-protein kinase SRK2I isoform 1 [Vitis vinifera]
VIT_200s0487g00050	2927	69.4371	285.765	2.03137	K19613;K13457	ko04014 Ras signaling pathway (Signal transduction)	-	GO:0005524//ATP binding;GO:0017111//nucleoside-triphosphatase activity;GO:0043531//ADP binding	GO:0006952//defense response	gi|359496928|ref|XP_003635374.1|/0.0/PREDICTED: probable disease resistance protein At5g66900-like [Vitis vinifera]
VIT_213s0147g00120	4591.15	86.8406	271.475	1.63742	K19613;K19613;K19613;K19613;K19613;K19613	ko04014 Ras signaling pathway (Signal transduction)	GO:0005622//intracellular;GO:0005622//intracellular;GO:0005622//intracellular;GO:0005622//intracellular;GO:0005622//intracellular;GO:0005622//intracellular	GO:0005515//protein binding;GO:0043531//ADP binding;GO:0005515//protein binding;GO:0043531//ADP binding;GO:0005515//protein binding;GO:0043531//ADP binding;GO:0005515//protein binding;GO:0043531//ADP binding;GO:0005515//protein binding;GO:0043531//ADP binding;GO:0005515//protein binding;GO:0043531//ADP binding	GO:0006952//defense response;GO:0007165//signal transduction;GO:0015743//malate transport;GO:0006952//defense response;GO:0007165//signal transduction;GO:0015743//malate transport;GO:0006952//defense response;GO:0007165//signal transduction;GO:0015743//malate transport;GO:0006952//defense response;GO:0007165//signal transduction;GO:0015743//malate transport;GO:0006952//defense response;GO:0007165…	gi|296089409|emb|CBI39228.3|/0.0/unnamed protein product [Vitis vinifera]
VIT_205s0077g00810	789	233.967	574.687	1.29421	K02183	ko04014 Ras signaling pathway (Signal transduction)	GO:0005576//extracellular region;GO:0005829//cytosol	GO:0005509//calcium ion binding;GO:0008234//cysteine-type peptidase activity	GO:0006508//proteolysis;GO:0009686//gibberellin biosynthetic process;GO:0009740//gibberellic acid mediated signaling pathway;GO:0010114//response to red light;GO:0042538//hyperosmotic salinity response	gi|225431988|ref|XP_002279066.1|/2.25171E-88/PREDICTED: calmodulin-like [Vitis vinifera]
VIT_205s0077g00800	2530.82	271.089	652.537	1.26537	K02183;K10735;K02183;K10735	ko04014 Ras signaling pathway (Signal transduction)	GO:0000811//GINS complex;GO:0000811//GINS complex	GO:0016491//oxidoreductase activity	GO:0006270//DNA replication initiation;GO:0006275//regulation of DNA replication;GO:0051726//regulation of cell cycle;GO:0055114//oxidation-reduction process;GO:0006270//DNA replication initiation;GO:0006275//regulation of DNA replication;GO:0051726//regulation of cell cycle	gi|225431990|ref|XP_002279153.1|/8.33751E-125/PREDICTED: DNA replication complex GINS protein SLD5 [Vitis vinifera]
VIT_218s0089g00550	3728	42.0851	95.4197	1.16924	K19613	ko04014 Ras signaling pathway (Signal transduction)	GO:0005622//intracellular	GO:0005515//protein binding;GO:0005524//ATP binding;GO:0017111//nucleoside-triphosphatase activity;GO:0043531//ADP binding	GO:0006952//defense response;GO:0007165//signal transduction	gi|359493553|ref|XP_003634625.1|/0.0/PREDICTED: TMV resistance protein N-like [Vitis vinifera]
VIT_218s0001g11570	2734	51.8546	12.5385	-1.99568	K00517	ko00363 Bisphenol degradation (Xenobiotics biodegradation and metabolism)	-	GO:0005506//iron ion binding;GO:0009055//electron carrier activity;GO:0020037//heme binding;GO:0033772	GO:0055114//oxidation-reduction process	gi|302142408|emb|CBI19611.3|/0.0/unnamed protein product [Vitis vinifera]
VIT_215s0048g01670	1953	33.5708	4.76875	-2.66575	K00517;K15402	ko00363 Bisphenol degradation (Xenobiotics biodegradation and metabolism)	-	GO:0004497//monooxygenase activity;GO:0005506//iron ion binding;GO:0009055//electron carrier activity;GO:0016705//oxidoreductase activity, acting on paired donors, with incorporation or reduction of molecular oxygen;GO:0020037//heme binding	GO:0055114//oxidation-reduction process	gi|296089094|emb|CBI38797.3|/0.0/unnamed protein product [Vitis vinifera]
VIT_206s0004g05280	2210.43	89.1606	35.9272	-1.29666	K08081;K08081;K08081;K08081;K08081	ko00960 Tropane, piperidine and pyridine alkaloid biosynthesis (Biosynthesis of other secondary metabolites)	-	GO:0000166//nucleotide binding;GO:0004090//carbonyl reductase (NADPH) activity;GO:0050356;GO:0000166//nucleotide binding;GO:0004090//carbonyl reductase (NADPH) activity;GO:0050356;GO:0000166//nucleotide binding;GO:0004090//carbonyl reductase (NADPH) activity;GO:0050356;GO:0000166//nucleotide binding;GO:0004090//carbonyl reductase (NADPH) activity;GO:0050356;GO:0000166//nucleotide binding;GO:00040…	GO:0006691//leukotriene metabolic process;GO:0006693//prostaglandin metabolic process;GO:0009821//alkaloid biosynthetic process;GO:0055114//oxidation-reduction process;GO:0006691//leukotriene metabolic process;GO:0006693//prostaglandin metabolic process;GO:0009821//alkaloid biosynthetic process;GO:0055114//oxidation-reduction process;GO:0006691//leukotriene metabolic process;GO:0006693//prostagla…	gi|297746022|emb|CBI16078.3|/1.10503E-70/unnamed protein product [Vitis vinifera]
VIT_206s0004g05340	1336	75.1908	24.8399	-1.5742	K08081;K08081;K08081	ko00960 Tropane, piperidine and pyridine alkaloid biosynthesis (Biosynthesis of other secondary metabolites)	-	GO:0000166//nucleotide binding;GO:0004090//carbonyl reductase (NADPH) activity;GO:0050356;GO:0000166//nucleotide binding;GO:0004090//carbonyl reductase (NADPH) activity;GO:0050356;GO:0000166//nucleotide binding;GO:0004090//carbonyl reductase (NADPH) activity;GO:0050356	GO:0006691//leukotriene metabolic process;GO:0006693//prostaglandin metabolic process;GO:0009821//alkaloid biosynthetic process;GO:0055114//oxidation-reduction process;GO:0006691//leukotriene metabolic process;GO:0006693//prostaglandin metabolic process;GO:0009821//alkaloid biosynthetic process;GO:0055114//oxidation-reduction process;GO:0006691//leukotriene metabolic process;GO:0006693//prostagla…	gi|359478910|ref|XP_003632186.1|/4.05371E-138/PREDICTED: tropinone reductase homolog At1g07440-like [Vitis vinifera]
VIT_205s0020g02530	3442.34	606.577	1564.56	1.36609	K04371;K04371;K04371;K04371;K04371	ko01521 EGFR tyrosine kinase inhibitor resistance ( Drug resistance)	GO:0005634//nucleus;GO:0005773//vacuole;GO:0005886//plasma membrane;GO:0005634//nucleus;GO:0005773//vacuole;GO:0005886//plasma membrane;GO:0005634//nucleus;GO:0005773//vacuole;GO:0005886//plasma membrane;GO:0005634//nucleus;GO:0005773//vacuole;GO:0005886//plasma membrane;GO:0005634//nucleus;GO:0005773//vacuole;GO:0005886//plasma membrane	GO:0004707//MAP kinase activity;GO:0004713//protein tyrosine kinase activity;GO:0005524//ATP binding;GO:0004707//MAP kinase activity;GO:0004713//protein tyrosine kinase activity;GO:0005524//ATP binding;GO:0004707//MAP kinase activity;GO:0004713//protein tyrosine kinase activity;GO:0005524//ATP binding;GO:0004707//MAP kinase activity;GO:0004713//protein tyrosine kinase activity;GO:0005524//ATP bin…	GO:0000165//MAPK cascade;GO:0006468//protein phosphorylation;GO:0007178//transmembrane receptor protein serine/threonine kinase signaling pathway;GO:0009069//serine family amino acid metabolic process;GO:0010075//regulation of meristem growth;GO:0000165//MAPK cascade;GO:0006468//protein phosphorylation;GO:0007178//transmembrane receptor protein serine/threonine kinase signaling pathway;GO:0009069…	gi|359477479|ref|XP_002279719.2|/0.0/PREDICTED: mitogen-activated protein kinase 16-like [Vitis vinifera]
VIT_211s0016g04590	4903	5.46454	96.4983	3.99668	K05681	ko01523 Antifolate resistance ( Drug resistance)	GO:0005886//plasma membrane;GO:0016021//integral component of membrane	GO:0005524//ATP binding;GO:0015416;GO:0015417//polyamine-transporting ATPase activity	GO:0010193//response to ozone;GO:0015692//lead ion transport;GO:0015716//organic phosphonate transport;GO:0015748;GO:0015846//polyamine transport;GO:0080168//abscisic acid transport	gi|359484384|ref|XP_002281660.2|/0.0/PREDICTED: LOW QUALITY PROTEIN: pleiotropic drug resistance protein 4-like [Vitis vinifera]
VIT_216s0050g02480	5460.45	409.414	1155.86	1.49593	K05666;K05666;K05666;K05666;K05666;K05666;K05666	ko01523 Antifolate resistance ( Drug resistance)	GO:0005774//vacuolar membrane;GO:0005886//plasma membrane;GO:0016021//integral component of membrane;GO:0005774//vacuolar membrane;GO:0005886//plasma membrane;GO:0016021//integral component of membrane;GO:0005774//vacuolar membrane;GO:0005886//plasma membrane;GO:0016021//integral component of membrane;GO:0005774//vacuolar membrane;GO:0005886//plasma membrane;GO:0016021//integral component of memb…	GO:0005524//ATP binding;GO:0032440//2-alkenal reductase [NAD(P)] activity;GO:0042626//ATPase activity, coupled to transmembrane movement of substances;GO:0005524//ATP binding;GO:0032440//2-alkenal reductase [NAD(P)] activity;GO:0042626//ATPase activity, coupled to transmembrane movement of substances;GO:0005524//ATP binding;GO:0032440//2-alkenal reductase [NAD(P)] activity;GO:0042626//ATPase acti…	GO:0055085//transmembrane transport;GO:0055114//oxidation-reduction process;GO:0055085//transmembrane transport;GO:0055114//oxidation-reduction process;GO:0055085//transmembrane transport;GO:0055114//oxidation-reduction process;GO:0055085//transmembrane transport;GO:0055114//oxidation-reduction process;GO:0055085//transmembrane transport;GO:0055114//oxidation-reduction process;GO:0055085//transme…	gi|359490537|ref|XP_002267650.2|/0.0/PREDICTED: ABC transporter C family member 10-like [Vitis vinifera]
VIT_216s0050g01620	2078	47.0169	6.52659	-2.73688	K05681	ko01523 Antifolate resistance ( Drug resistance)	GO:0016021//integral component of membrane	GO:0005524//ATP binding;GO:0015416	GO:0015716//organic phosphonate transport;GO:0015748	gi|225464655|ref|XP_002276766.1|/0.0/PREDICTED: ABC transporter G family member 8-like [Vitis vinifera]
VIT_217s0000g05860	3474.86	201.24	552.785	1.45499	K05643;K05643;K05643;K05643;K05643;K05643;K05643;K05643	ko02010 ABC transporters (Membrane transport)	GO:0005737//cytoplasm;GO:0005886//plasma membrane;GO:0009506//plasmodesma;GO:0005737//cytoplasm;GO:0005886//plasma membrane;GO:0009506//plasmodesma;GO:0005737//cytoplasm;GO:0005886//plasma membrane;GO:0009506//plasmodesma;GO:0005737//cytoplasm;GO:0005886//plasma membrane;GO:0009506//plasmodesma;GO:0005737//cytoplasm;GO:0005886//plasma membrane;GO:0009506//plasmodesma;GO:0005737//cytoplasm;GO:0005…	GO:0005524//ATP binding;GO:0009055//electron carrier activity;GO:0015035//protein disulfide oxidoreductase activity;GO:0015417//polyamine-transporting ATPase activity;GO:0005524//ATP binding;GO:0009055//electron carrier activity;GO:0015035//protein disulfide oxidoreductase activity;GO:0015417//polyamine-transporting ATPase activity;GO:0005524//ATP binding;GO:0009055//electron carrier activity;GO:…	GO:0000280//nuclear division;GO:0006662//glycerol ether metabolic process;GO:0007000//nucleolus organization;GO:0009407//toxin catabolic process;GO:0010583//response to cyclopentenone;GO:0015846//polyamine transport;GO:0045454//cell redox homeostasis;GO:0000280//nuclear division;GO:0006662//glycerol ether metabolic process;GO:0007000//nucleolus organization;GO:0009407//toxin catabolic process;GO:…	gi|297734006|emb|CBI15253.3|/0.0/unnamed protein product [Vitis vinifera]
VIT_203s0017g02260	791	5327.32	11843.7	1.15255	K02883;K05747;K11855	ko03010 Ribosome (Translation)	GO:0005839//proteasome core complex;GO:0009535//chloroplast thylakoid membrane;GO:0048046//apoplast	GO:0004298//threonine-type endopeptidase activity;GO:0008289//lipid binding	GO:0006869//lipid transport;GO:0009556//microsporogenesis;GO:0051603//proteolysis involved in cellular protein catabolic process;GO:0052543//callose deposition in cell wall	gi|296087554|emb|CBI34143.3|/2.30164E-41/unnamed protein product [Vitis vinifera]
VIT_206s0004g00980	778	75.128	30.4712	-1.28472	K02889;K19027;K01870	ko03010 Ribosome (Translation)	-	-	-	gi|225435676|ref|XP_002285685.1|/5.95941E-98/PREDICTED: disease resistance response protein 206 [Vitis vinifera]
VIT_214s0068g00880	732	234.068	94.0498	-1.30978	K02978	ko03010 Ribosome (Translation)	GO:0005618//cell wall;GO:0005730//nucleolus;GO:0005886//plasma membrane;GO:0009506//plasmodesma;GO:0022627//cytosolic small ribosomal subunit	GO:0003735//structural constituent of ribosome;GO:0046872//metal ion binding	GO:0001510//RNA methylation;GO:0006412//translation;GO:0009664//plant-type cell wall organization;GO:0042254//ribosome biogenesis;GO:0042545//cell wall modification	gi|296082250|emb|CBI21255.3|/7.3225E-72/unnamed protein product [Vitis vinifera]
VIT_201s0026g00360	2205.96	22.2563	3.27361	-2.5549	K02940;K01623;K02940;K01623;K02940;K01623;K01623;K02940;K01623;K02940;K01623;K02940;K02940;K01623;K01623;K02940;K01623;K02940	ko03010 Ribosome (Translation)	GO:0016020//membrane;GO:0016020//membrane;GO:0016020//membrane;GO:0016020//membrane;GO:0016020//membrane;GO:0016020//membrane;GO:0016020//membrane;GO:0016020//membrane;GO:0016020//membrane	-	-	gi|359473431|ref|XP_002265468.2|/2.19935E-84/PREDICTED: auxin-induced protein 5NG4-like [Vitis vinifera]
VIT_204s0008g05640	713	304.203	26.1889	-3.50723	K02883;K05747;K11855	ko03010 Ribosome (Translation)	-	-	GO:0006869//lipid transport	gi|225430322|ref|XP_002285197.1|/2.00204E-29/PREDICTED: putative lipid-binding protein At4g00165 [Vitis vinifera]
VIT_215s0048g01750	1546	120.092	1581.11	3.71187	K03456;K19519;K06464;K06588	ko03015 mRNA surveillance pathway ( Translation)	GO:0009505//plant-type cell wall;GO:0016023//cytoplasmic, membrane-bounded vesicle;GO:0046658//anchored component of plasma membrane;GO:0048046//apoplast	-	GO:0007389//pattern specification process;GO:0008361//regulation of cell size;GO:0009664//plant-type cell wall organization;GO:0009832//plant-type cell wall biogenesis;GO:0009926//auxin polar transport;GO:0010015//root morphogenesis;GO:0040007//growth	gi|359489366|ref|XP_002270426.2|/0.0/PREDICTED: fasciclin-like arabinogalactan protein 10-like [Vitis vinifera]
VIT_201s0011g04320	2444	27.9607	90.3017	1.66961	K14376	ko03015 mRNA surveillance pathway ( Translation)	GO:0005634//nucleus;GO:0005739//mitochondrion	GO:0003723//RNA binding;GO:0004652//polynucleotide adenylyltransferase activity;GO:0005515//protein binding	GO:0006351//transcription, DNA-templated;GO:0022402//cell cycle process;GO:0043631//RNA polyadenylation	gi|297737752|emb|CBI26953.3|/0.0/unnamed protein product [Vitis vinifera]
VIT_208s0007g04850	2678.56	184.238	537.838	1.54242	K11584;K11584;K11584;K11584;K11584;K11584;K11584	ko03015 mRNA surveillance pathway ( Translation)	GO:0000159//protein phosphatase type 2A complex;GO:0005730//nucleolus;GO:0005739//mitochondrion;GO:0005777//peroxisome;GO:0005829//cytosol;GO:0000159//protein phosphatase type 2A complex;GO:0005730//nucleolus;GO:0005739//mitochondrion;GO:0005777//peroxisome;GO:0005829//cytosol;GO:0000159//protein phosphatase type 2A complex;GO:0005730//nucleolus;GO:0005739//mitochondrion;GO:0005777//peroxisome;GO…	GO:0004672//protein kinase activity;GO:0005524//ATP binding;GO:0008266//poly(U) RNA binding;GO:0008601//protein phosphatase type 2A regulator activity;GO:0004672//protein kinase activity;GO:0005524//ATP binding;GO:0008266//poly(U) RNA binding;GO:0008601//protein phosphatase type 2A regulator activity;GO:0004672//protein kinase activity;GO:0005524//ATP binding;GO:0008266//poly(U) RNA binding;GO:00…	GO:0006468//protein phosphorylation;GO:0007165//signal transduction;GO:0042325//regulation of phosphorylation;GO:0006468//protein phosphorylation;GO:0007165//signal transduction;GO:0042325//regulation of phosphorylation;GO:0006468//protein phosphorylation;GO:0007165//signal transduction;GO:0042325//regulation of phosphorylation;GO:0006468//protein phosphorylation;GO:0007165//signal transduction;G…	gi|225441169|ref|XP_002268629.1|/0.0/PREDICTED: serine/threonine protein phosphatase 2A 57 kDa regulatory subunit B' alpha isoform [Vitis vinifera]
VIT_214s0060g00720	1075	79.0728	217.252	1.45096	K12608	ko03018 RNA degradation ( Folding, sorting and degradation)	GO:0005886//plasma membrane	GO:0005524//ATP binding;GO:0015416	GO:0006007//glucose catabolic process;GO:0009744//response to sucrose;GO:0009813//flavonoid biosynthetic process;GO:0010224//response to UV-B;GO:0015716//organic phosphonate transport;GO:0015748;GO:0080167//response to karrikin	gi|225450516|ref|XP_002281168.1|/9.50551E-174/PREDICTED: ABC transporter I family member 20 isoform 1 [Vitis vinifera]
VIT_201s0010g00920	2886	93.0936	11.4267	-2.9597	K04077	ko03018 RNA degradation (Folding, sorting and degradation)	GO:0005730//nucleolus;GO:0005739//mitochondrion;GO:0005886//plasma membrane;GO:0009570//chloroplast stroma;GO:0009941//chloroplast envelope;GO:0010319//stromule;GO:0022626//cytosolic ribosome;GO:0048046//apoplast	GO:0005524//ATP binding	GO:0000023//maltose metabolic process;GO:0006655//phosphatidylglycerol biosynthetic process;GO:0008219//cell death;GO:0009409//response to cold;GO:0009627//systemic acquired resistance;GO:0016556//mRNA modification;GO:0019252//starch biosynthetic process;GO:0019288//isopentenyl diphosphate biosynthetic process, methylerythritol 4-phosphate pathway;GO:0042026//protein refolding;GO:0043085//positiv…	gi|359473645|ref|XP_002269341.2|/0.0/PREDICTED: chaperonin 60 subunit beta 4, chloroplastic-like [Vitis vinifera]
VIT_206s0061g00220	1767	78.6724	14.7622	-2.36598	K03124;K03124	ko03022 Basal transcription factors (Transcription)	GO:0005634//nucleus;GO:0005840//ribosome;GO:0005634//nucleus;GO:0005840//ribosome	GO:0003743//translation initiation factor activity;GO:0008270//zinc ion binding;GO:0017025//TBP-class protein binding;GO:0003743//translation initiation factor activity;GO:0008270//zinc ion binding;GO:0017025//TBP-class protein binding	GO:0000394//RNA splicing, via endonucleolytic cleavage and ligation;GO:0006352//DNA-templated transcription, initiation;GO:0006355//regulation of transcription, DNA-templated;GO:0006366//transcription from RNA polymerase II promoter;GO:0006446//regulation of translational initiation;GO:0000394//RNA splicing, via endonucleolytic cleavage and ligation;GO:0006352//DNA-templated transcription, initia…	gi|225436547|ref|XP_002277679.1|/2.28896E-150/PREDICTED: transcription initiation factor IIB [Vitis vinifera]
VIT_205s0049g00760	1048	2639.87	68102.5	4.68884	K12890;K14972	ko03040 Spliceosome (Transcription)	-	-	-	-
VIT_211s0016g02920	2154	54.0478	486.178	3.15458	K12662	ko03040 Spliceosome (Transcription)	GO:0005634//nucleus;GO:0009505//plant-type cell wall	-	-	gi|225445053|ref|XP_002283391.1|/0.0/PREDICTED: uncharacterized protein LOC100245695 [Vitis vinifera]
VIT_218s0001g08320	2590	310.352	756.018	1.28282	K12662	ko03040 Spliceosome (Transcription)	GO:0005634//nucleus;GO:0005886//plasma membrane	-	-	gi|225458956|ref|XP_002285542.1|/0.0/PREDICTED: uncharacterized protein LOC100245533 isoform 1 [Vitis vinifera]
VIT_219s0015g00980	991	1354.1	615.813	-1.13598	K12863	ko03040 Spliceosome (Transcription)	GO:0005681//spliceosomal complex	-	GO:0000398//mRNA splicing, via spliceosome	gi|225461997|ref|XP_002272453.1|/2.58892E-82/PREDICTED: protein CWC15 homolog A isoform 2 [Vitis vinifera]
VIT_217s0000g00110	1515	209.739	94.2148	-1.14937	K03033;K00366	ko03050 Proteasome (Folding, sorting and degradation)	-	GO:0005506//iron ion binding	-	gi|225456515|ref|XP_002284699.1|/2.16694E-114/PREDICTED: uncharacterized protein LOC100259528 [Vitis vinifera]
VIT_208s0007g01360	1757.24	422.049	159.831	-1.3974	K06700;K06700;K06700;K06700;K06700;K06700;K06700;K06700;K06700;K06700;K06700	ko03050 Proteasome (Folding, sorting and degradation)	-	-	GO:0006979//response to oxidative stress;GO:0006979//response to oxidative stress;GO:0009651//response to salt stress;GO:0006979//response to oxidative stress;GO:0009651//response to salt stress;GO:0006914//autophagy;GO:0006979//response to oxidative stress;GO:0009651//response to salt stress;GO:0006979//response to oxidative stress;GO:0009651//response to salt stress;GO:0006979//response to oxid…	gi|147862480|emb|CAN84007.1|/1.20131E-46/hypothetical protein VITISV_033736 [Vitis vinifera]
VIT_205s0077g01470	3145	388.351	2003.9	2.36552	K10956	ko03060 Protein export (Folding, sorting and degradation)	GO:0005768//endosome;GO:0005783//endoplasmic reticulum;GO:0005794//Golgi apparatus;GO:0005802//trans-Golgi network;GO:0009506//plasmodesma;GO:0046658//anchored component of plasma membrane	GO:0030246//carbohydrate binding	GO:0009932//cell tip growth;GO:0048527//lateral root development;GO:0048767//root hair elongation	gi|225431865|ref|XP_002275330.1|/0.0/PREDICTED: COBRA-like protein 7 [Vitis vinifera]
VIT_202s0025g02140	2893	626.922	3148.87	2.32734	K09490;K09490	ko03060 Protein export (Folding, sorting and degradation)	GO:0005618//cell wall;GO:0005730//nucleolus;GO:0005774//vacuolar membrane;GO:0005788//endoplasmic reticulum lumen;GO:0005794//Golgi apparatus;GO:0005829//cytosol;GO:0005886//plasma membrane;GO:0009506//plasmodesma;GO:0009507//chloroplast;GO:0016592//mediator complex;GO:0005618//cell wall;GO:0005730//nucleolus;GO:0005773//vacuole;GO:0005788//endoplasmic reticulum lumen;GO:0005886//plasma membrane;…	GO:0005524//ATP binding;GO:0032440//2-alkenal reductase [NAD(P)] activity;GO:0005524//ATP binding;GO:0032440//2-alkenal reductase [NAD(P)] activity	GO:0006457//protein folding;GO:0009408//response to heat;GO:0010197//polar nucleus fusion;GO:0030433//ER-associated ubiquitin-dependent protein catabolic process;GO:0034976//response to endoplasmic reticulum stress;GO:0046686//response to cadmium ion;GO:0055114//oxidation-reduction process;GO:0009408//response to heat;GO:0010197//polar nucleus fusion;GO:0030433//ER-associated ubiquitin-dependent …	gi|225426230|ref|XP_002263323.1|/0.0/PREDICTED: luminal-binding protein 5 [Vitis vinifera]
VIT_216s0098g01580	2662.58	478.817	1527.6	1.67244	K09490;K09490	ko03060 Protein export (Folding, sorting and degradation)	GO:0005618//cell wall;GO:0005730//nucleolus;GO:0005773//vacuole;GO:0005788//endoplasmic reticulum lumen;GO:0005886//plasma membrane;GO:0009507//chloroplast;GO:0005618//cell wall;GO:0005730//nucleolus;GO:0005773//vacuole;GO:0005788//endoplasmic reticulum lumen;GO:0005886//plasma membrane;GO:0009507//chloroplast	GO:0005524//ATP binding;GO:0032440//2-alkenal reductase [NAD(P)] activity;GO:0005524//ATP binding;GO:0032440//2-alkenal reductase [NAD(P)] activity	GO:0009408//response to heat;GO:0010197//polar nucleus fusion;GO:0030433//ER-associated ubiquitin-dependent protein catabolic process;GO:0034976//response to endoplasmic reticulum stress;GO:0046686//response to cadmium ion;GO:0055114//oxidation-reduction process;GO:0009408//response to heat;GO:0010197//polar nucleus fusion;GO:0030433//ER-associated ubiquitin-dependent protein catabolic process;GO…	gi|359490716|ref|XP_002276268.2|/0.0/PREDICTED: luminal-binding protein 5-like [Vitis vinifera]
VIT_201s0026g00850	1797.1	16.3066	64.0922	1.9348	K10773;K10773	ko03410 Base excision repair (Replication and repair)	GO:0005622//intracellular;GO:0005622//intracellular	GO:0003676//nucleic acid binding;GO:0008270//zinc ion binding;GO:0003676//nucleic acid binding;GO:0008270//zinc ion binding	-	gi|359473325|ref|XP_003631292.1|/5.47784E-143/PREDICTED: uncharacterized protein LOC100854597 [Vitis vinifera]
VIT_204s0008g05340	1956.84	63.6654	28.5569	-1.13968	K03575;K13258;K14493;K03575;K13258;K14493	ko03410 Base excision repair (Replication and repair)	GO:0009507//chloroplast	GO:0031072//heat shock protein binding;GO:0051082//unfolded protein binding;GO:0031072//heat shock protein binding;GO:0051082//unfolded protein binding	GO:0006098//pentose-phosphate shunt;GO:0006364//rRNA processing;GO:0009657//plastid organization;GO:0009773//photosynthetic electron transport in photosystem I;GO:0010207//photosystem II assembly;GO:0019288//isopentenyl diphosphate biosynthetic process, methylerythritol 4-phosphate pathway	gi|359476132|ref|XP_003631795.1|/1.01251E-38/PREDICTED: uncharacterized protein LOC100854903 [Vitis vinifera]
VIT_205s0020g03010	1005	97.4326	29.0716	-1.72353	K03575;K17872;K14493;K13258;K02923	ko03410 Base excision repair (Replication and repair)	-	GO:0050253//retinyl-palmitate esterase activity;GO:0080030//methyl indole-3-acetate esterase activity;GO:0080031//methyl salicylate esterase activity;GO:0080032//methyl jasmonate esterase activity	GO:0042572//retinol metabolic process	gi|82697947|gb|ABB89008.1|/1.57309E-97/CXE carboxylesterase [Malus pumila]
VIT_211s0052g01120	600	152.565	36.216	-2.05611	K10773;K10880	ko03410 Base excision repair (Replication and repair)	GO:0005622//intracellular	GO:0008270//zinc ion binding	-	gi|225446086|ref|XP_002273296.1|/1.41942E-80/PREDICTED: zinc finger protein 2-like [Vitis vinifera]
VIT_203s0091g00860	2354.9	150.813	42.6188	-1.8083	K03511;K03511;K03511;K03511;K03511	ko03460 Fanconi anemia pathway (Replication and repair)	GO:0005789//endoplasmic reticulum membrane;GO:0005886//plasma membrane;GO:0009706//chloroplast inner membrane;GO:0016021//integral component of membrane;GO:0016529//sarcoplasmic reticulum;GO:0042575;GO:0005789//endoplasmic reticulum membrane;GO:0005886//plasma membrane;GO:0009706//chloroplast inner membrane;GO:0016021//integral component of membrane;GO:0016529//sarcoplasmic reticulum;GO:0042575;G…	GO:0003684//damaged DNA binding;GO:0003887//DNA-directed DNA polymerase activity;GO:0005388//calcium-transporting ATPase activity;GO:0005524//ATP binding;GO:0046872//metal ion binding;GO:0003684//damaged DNA binding;GO:0003887//DNA-directed DNA polymerase activity;GO:0005388//calcium-transporting ATPase activity;GO:0005524//ATP binding;GO:0046872//metal ion binding;GO:0003684//damaged DNA binding…	GO:0006260//DNA replication;GO:0006281//DNA repair;GO:0006754//ATP biosynthetic process;GO:0070588//calcium ion transmembrane transport;GO:0006260//DNA replication;GO:0006281//DNA repair;GO:0006754//ATP biosynthetic process;GO:0070588//calcium ion transmembrane transport;GO:0006260//DNA replication;GO:0006281//DNA repair;GO:0006754//ATP biosynthetic process;GO:0070588//calcium ion transmembrane t…	gi|296083048|emb|CBI22452.3|/0.0/unnamed protein product [Vitis vinifera]
VIT_213s0064g01050	1953.28	1445.01	3209.21	1.1508	K05863;K05863;K05863;K05863	ko04020 Calcium signaling pathway (Signal transduction)	GO:0005618//cell wall;GO:0005730//nucleolus;GO:0005743//mitochondrial inner membrane;GO:0005773//vacuole;GO:0005886//plasma membrane;GO:0009941//chloroplast envelope;GO:0016021//integral component of membrane;GO:0005618//cell wall;GO:0005730//nucleolus;GO:0005743//mitochondrial inner membrane;GO:0005773//vacuole;GO:0005886//plasma membrane;GO:0009941//chloroplast envelope;GO:0016021//integral com…	GO:0005215//transporter activity;GO:0005507//copper ion binding;GO:0005215//transporter activity;GO:0005507//copper ion binding;GO:0005215//transporter activity;GO:0005507//copper ion binding;GO:0005215//transporter activity;GO:0005507//copper ion binding	GO:0015865//purine nucleotide transport;GO:0055085//transmembrane transport;GO:0015865//purine nucleotide transport;GO:0055085//transmembrane transport;GO:0015865//purine nucleotide transport;GO:0055085//transmembrane transport;GO:0015865//purine nucleotide transport;GO:0055085//transmembrane transport	gi|225450149|ref|XP_002279748.1|/9.58467E-161/PREDICTED: ADP,ATP carrier protein 1, mitochondrial-like [Vitis vinifera]
VIT_201s0011g05340	4274.19	318.392	944.405	1.56674	K04936;K13407;K13407;K04936	ko04022 cGMP-PKG signaling pathway (Signal transduction)	-	-	-	gi|359472612|ref|XP_002280971.2|/0.0/PREDICTED: uncharacterized protein LOC100268019 [Vitis vinifera]
VIT_216s0050g01300	1092	2.23882	102.431	5.17214	K05747	ko04062 Chemokine signaling pathway (Immune system)	GO:0005737//cytoplasm	GO:0005515//protein binding;GO:0016747//transferase activity, transferring acyl groups other than amino-acyl groups	GO:0010090//trichome morphogenesis;GO:0010143//cutin biosynthetic process;GO:0048730//epidermis morphogenesis;GO:0051179//localization	gi|225464609|ref|XP_002275480.1|/3.90423E-99/PREDICTED: uncharacterized protein LOC100242355 [Vitis vinifera]
VIT_209s0002g01890	2032	173.223	917.083	2.40025	K05747;K12602	ko04062 Chemokine signaling pathway (Immune system)	-	-	-	gi|297743056|emb|CBI35923.3|/0.0/unnamed protein product [Vitis vinifera]
VIT_211s0016g04830	2005.04	273.144	119.93	-1.1833	K11434;K11434	ko04068 FoxO signaling pathway (Signal transduction)	GO:0005634//nucleus;GO:0005829//cytosol;GO:0005634//nucleus;GO:0005829//cytosol	GO:0008469//histone-arginine N-methyltransferase activity;GO:0016277//[myelin basic protein]-arginine N-methyltransferase activity;GO:0035241//protein-arginine omega-N monomethyltransferase activity;GO:0035242//protein-arginine omega-N asymmetric methyltransferase activity;GO:0008469//histone-arginine N-methyltransferase activity;GO:0016277//[myelin basic protein]-arginine N-methyltransferase act…	GO:0009909//regulation of flower development;GO:0010228//vegetative to reproductive phase transition of meristem;GO:0019919//peptidyl-arginine methylation, to asymmetrical-dimethyl arginine;GO:0034968//histone lysine methylation;GO:0034969//histone arginine methylation;GO:0009909//regulation of flower development;GO:0010228//vegetative to reproductive phase transition of meristem;GO:0019919//pept…	gi|225445416|ref|XP_002285026.1|/0.0/PREDICTED: probable protein arginine N-methyltransferase 4.2 [Vitis vinifera]
VIT_217s0000g01460	3062.87	1025.98	349.784	-1.55078	K07200;K07200	ko04068 FoxO signaling pathway (Signal transduction)	GO:0009505//plant-type cell wall;GO:0009505//plant-type cell wall;GO:0009505//plant-type cell wall;GO:0009505//plant-type cell wall	GO:0003924//GTPase activity;GO:0005515//protein binding;GO:0005525//GTP binding;GO:0016301//kinase activity;GO:0003924//GTPase activity;GO:0005515//protein binding;GO:0005525//GTP binding;GO:0016301//kinase activity;GO:0003924//GTPase activity;GO:0005515//protein binding;GO:0005525//GTP binding;GO:0016301//kinase activity;GO:0003924//GTPase activity;GO:0005515//protein binding;GO:0005525//GTP bin…	GO:0016310//phosphorylation;GO:0016310//phosphorylation;GO:0016310//phosphorylation;GO:0016310//phosphorylation	gi|297734412|emb|CBI15659.3|/3.33333E-164/unnamed protein product [Vitis vinifera]
VIT_205s0020g00830	1334	60.4171	19.127	-1.62809	K07198	ko04068 FoxO signaling pathway (Signal transduction)	GO:0005886//plasma membrane;GO:0009536//plastid	GO:0004683//calmodulin-dependent protein kinase activity;GO:0004713//protein tyrosine kinase activity;GO:0005515//protein binding;GO:0005524//ATP binding	GO:0006468//protein phosphorylation;GO:0009069//serine family amino acid metabolic process;GO:0009651//response to salt stress;GO:0009737//response to abscisic acid;GO:0010118//stomatal movement;GO:0019722//calcium-mediated signaling	gi|297736814|emb|CBI26015.3|/0.0/unnamed protein product [Vitis vinifera]
VIT_200s0179g00210	11150	588.966	1426.43	1.27526	K18953	ko04071 Sphingolipid signaling pathway (Signal transduction)	GO:0005634//nucleus;GO:0009507//chloroplast	GO:0005515//protein binding;GO:0016706//oxidoreductase activity, acting on paired donors, with incorporation or reduction of molecular oxygen, 2-oxoglutarate as one donor, and incorporation of one atom each of oxygen into both donors;GO:0046872//metal ion binding	GO:0007033//vacuole organization;GO:0007165//signal transduction;GO:0009737//response to abscisic acid;GO:0009825//multidimensional cell growth;GO:0010090//trichome morphogenesis;GO:0055114//oxidation-reduction process	gi|359495455|ref|XP_002274761.2|/0.0/PREDICTED: uncharacterized protein LOC100264735 [Vitis vinifera]
VIT_212s0035g01740	3307	297.53	806.088	1.43601	K01528;K01528;K01528;K01528	ko04072 Phospholipase D signaling pathway (Signal transduction)	GO:0005774//vacuolar membrane;GO:0005794//Golgi apparatus;GO:0005829//cytosol;GO:0005886//plasma membrane;GO:0009504//cell plate;GO:0009506//plasmodesma;GO:0045334//clathrin-coated endocytic vesicle;GO:0005774//vacuolar membrane;GO:0005794//Golgi apparatus;GO:0005829//cytosol;GO:0005886//plasma membrane;GO:0009504//cell plate;GO:0009506//plasmodesma;GO:0045334//clathrin-coated endocytic vesicle;G…	GO:0003924//GTPase activity;GO:0005525//GTP binding;GO:0005543//phospholipid binding;GO:0030276//clathrin binding;GO:0003924//GTPase activity;GO:0005525//GTP binding;GO:0005543//phospholipid binding;GO:0030276//clathrin binding;GO:0003924//GTPase activity;GO:0005525//GTP binding;GO:0005543//phospholipid binding;GO:0030276//clathrin binding;GO:0003924//GTPase activity;GO:0005525//GTP binding;GO:00…	GO:0006896//Golgi to vacuole transport;GO:0009737//response to abscisic acid;GO:0048488//synaptic vesicle endocytosis;GO:0072583//clathrin-mediated endocytosis;GO:0006896//Golgi to vacuole transport;GO:0009737//response to abscisic acid;GO:0048488//synaptic vesicle endocytosis;GO:0072583//clathrin-mediated endocytosis;GO:0006896//Golgi to vacuole transport;GO:0009737//response to abscisic acid;GO…	gi|225465253|ref|XP_002268311.1|/0.0/PREDICTED: dynamin-2B [Vitis vinifera]
VIT_215s0046g01530	2184	77.8317	181.51	1.2151	K06636;K10406	ko04110 Cell cycle (Cell growth and death)	GO:0005886//plasma membrane;GO:0009507//chloroplast	-	-	gi|359489831|ref|XP_002276470.2|/0.0/PREDICTED: uncharacterized protein At5g41620-like [Vitis vinifera]
VIT_206s0004g05950	2808.63	287.28	84.9076	-1.75112	K06636;K06636	ko04110 Cell cycle (Cell growth and death)	-	-	GO:0007020//microtubule nucleation;GO:0009639//response to red or far red light;GO:0009959//negative gravitropism;GO:0010075//regulation of meristem growth;GO:0048653//anther development;GO:0007020//microtubule nucleation;GO:0009639//response to red or far red light;GO:0009959//negative gravitropism;GO:0010075//regulation of meristem growth;GO:0048653//anther development	gi|359478573|ref|XP_002279931.2|/0.0/PREDICTED: uncharacterized protein LOC100265690 [Vitis vinifera]
VIT_206s0004g07870	1670	847.026	2158.16	1.34869	K12761	ko04113 Meiosis - yeast (Cell growth and death)	GO:0005773//vacuole;GO:0005886//plasma membrane	GO:0004683//calmodulin-dependent protein kinase activity;GO:0004713//protein tyrosine kinase activity;GO:0005524//ATP binding;GO:0042802//identical protein binding	GO:0006468//protein phosphorylation;GO:0009069//serine family amino acid metabolic process;GO:0009268//response to pH;GO:0009611//response to wounding;GO:0009620//response to fungus;GO:0009695//jasmonic acid biosynthetic process;GO:0009723//response to ethylene;GO:0009738//abscisic acid-activated signaling pathway;GO:0009753//response to jasmonic acid;GO:0010118//stomatal movement;GO:0019722//cal…	gi|225434363|ref|XP_002268622.1|/0.0/PREDICTED: CBL-interacting serine/threonine-protein kinase 11 [Vitis vinifera]
VIT_201s0026g00880	1386	98.0824	41.8773	-1.21573	K03362;K10260;K16794	ko04114 Oocyte meiosis (Cell growth and death)	GO:0005737//cytoplasm;GO:0005834//heterotrimeric G-protein complex;GO:0016459//myosin complex	GO:0000166//nucleotide binding;GO:0005515//protein binding;GO:0016905//myosin heavy chain kinase activity	GO:0009069//serine family amino acid metabolic process;GO:0009733//response to auxin;GO:0009741//response to brassinosteroid;GO:0016310//phosphorylation	gi|359473323|ref|XP_003631291.1|/0.0/PREDICTED: uncharacterized WD repeat-containing protein alr3466-like [Vitis vinifera]
VIT_204s0008g04480	5087.39	5527.83	2397.44	-1.20501	K10144;K10144;K10144	ko04115 p53 signaling pathway (Cell growth and death)	GO:0005634//nucleus;GO:0005634//nucleus;GO:0005634//nucleus	GO:0005515//protein binding;GO:0008270//zinc ion binding;GO:0005515//protein binding;GO:0008270//zinc ion binding;GO:0005515//protein binding;GO:0008270//zinc ion binding	-	gi|225430120|ref|XP_002284652.1|/8.08053E-178/PREDICTED: RING finger and CHY zinc finger domain-containing protein 1 [Vitis vinifera]
VIT_200s1787g00005	875	30.3582	132.579	2.10429	K10581	ko04120 Ubiquitin mediated proteolysis (Folding, sorting and degradation)	GO:0005768//endosome;GO:0005794//Golgi apparatus;GO:0005802//trans-Golgi network;GO:0009507//chloroplast;GO:0016020//membrane	-	-	gi|359496164|ref|XP_002269383.2|/3.15323E-138/PREDICTED: uncharacterized protein LOC100253928 [Vitis vinifera]
VIT_200s1927g00010	679	59.1989	243.976	2.03174	K10581	ko04120 Ubiquitin mediated proteolysis (Folding, sorting and degradation)	GO:0043231//intracellular membrane-bounded organelle;GO:0044444//cytoplasmic part	-	-	gi|359493665|ref|XP_002282376.2|/6.57594E-18/PREDICTED: uncharacterized protein LOC100250261 [Vitis vinifera]
VIT_217s0000g05820	1111.02	654.423	223.082	-1.55002	K10573;K10573;K10573;K10573;K10573;K10573;K10573;K10573;K10573	ko04120 Ubiquitin mediated proteolysis (Folding, sorting and degradation)	GO:0005634//nucleus;GO:0005829//cytosol;GO:0005634//nucleus;GO:0005829//cytosol;GO:0005634//nucleus;GO:0005829//cytosol;GO:0005634//nucleus;GO:0005829//cytosol	GO:0004842//ubiquitin-protein transferase activity;GO:0005524//ATP binding;GO:0004842//ubiquitin-protein transferase activity;GO:0005524//ATP binding;GO:0004842//ubiquitin-protein transferase activity;GO:0005524//ATP binding;GO:0004842//ubiquitin-protein transferase activity;GO:0005524//ATP binding;GO:0004842//ubiquitin-protein transferase activity;GO:0005524//ATP binding;GO:0004842//ubiquitin-pr…	GO:0009650//UV protection;GO:0009910//negative regulation of flower development;GO:0009965//leaf morphogenesis;GO:0010228//vegetative to reproductive phase transition of meristem;GO:0033523//histone H2B ubiquitination;GO:0016567//protein ubiquitination;GO:0009650//UV protection;GO:0009910//negative regulation of flower development;GO:0009965//leaf morphogenesis;GO:0010228//vegetative to reproduct…	gi|296086416|emb|CBI32005.3|/1.1247E-38/unnamed protein product [Vitis vinifera]
VIT_208s0032g01150	1343	411.2	1140.84	1.4708	K08486	ko04130 SNARE interactions in vesicular transport ( Folding, sorting and degradation)	GO:0005802//trans-Golgi network;GO:0005886//plasma membrane;GO:0009504//cell plate;GO:0009506//plasmodesma;GO:0031201//SNARE complex	GO:0005484//SNAP receptor activity;GO:0043495//protein anchor	GO:0000165//MAPK cascade;GO:0002679//respiratory burst involved in defense response;GO:0006355//regulation of transcription, DNA-templated;GO:0006862//nucleotide transport;GO:0006888//ER to Golgi vesicle-mediated transport;GO:0009409//response to cold;GO:0009414//response to water deprivation;GO:0009595//detection of biotic stimulus;GO:0009611//response to wounding;GO:0009625//response to insect;…	gi|225463272|ref|XP_002263986.1|/2.16504E-147/PREDICTED: syntaxin-121-like [Vitis vinifera]
VIT_211s0052g00960	576	432.693	128.227	-1.74976	K08498	ko04130 SNARE interactions in vesicular transport (Folding, sorting and degradation)	GO:0005634//nucleus;GO:0005739//mitochondrion;GO:0005794//Golgi apparatus;GO:0016020//membrane	-	GO:0048193//Golgi vesicle transport	gi|225446056|ref|XP_002271381.1|/1.37907E-72/PREDICTED: uncharacterized protein LOC100252969 [Vitis vinifera]
VIT_217s0000g07540	954.01	8.51579	27.9391	1.64443	K11644;K11644;K11644;K11644;K11644	ko04139 Regulation of mitophagy - yeast (Transport and catabolism)	GO:0005634//nucleus;GO:0005634//nucleus;GO:0005634//nucleus;GO:0005634//nucleus;GO:0005634//nucleus	-	GO:0009628//response to abiotic stimulus;GO:0009737//response to abscisic acid;GO:0044707;GO:0045892//negative regulation of transcription, DNA-templated;GO:0009628//response to abiotic stimulus;GO:0009737//response to abscisic acid;GO:0044707;GO:0045892//negative regulation of transcription, DNA-templated;GO:0009737//response to abscisic acid;GO:0010048//vernalization response;GO:0043481//anthoc…	gi|225457172|ref|XP_002280515.1|/2.3716E-51/PREDICTED: paired amphipathic helix protein Sin3-like 3 [Vitis vinifera]
VIT_204s0044g01310	1084.83	72.6395	11.5505	-2.5897	K17065;K17065;K17065;K17065	ko04139 Regulation of mitophagy - yeast (Transport and catabolism)	GO:0005739//mitochondrion;GO:0005886//plasma membrane;GO:0009535//chloroplast thylakoid membrane;GO:0010598//NAD(P)H dehydrogenase complex (plastoquinone);GO:0005739//mitochondrion;GO:0005886//plasma membrane;GO:0009535//chloroplast thylakoid membrane;GO:0010598//NAD(P)H dehydrogenase complex (plastoquinone);GO:0005739//mitochondrion;GO:0005886//plasma membrane;GO:0009535//chloroplast thylakoid m…	GO:0003924//GTPase activity;GO:0005525//GTP binding;GO:0016655//oxidoreductase activity, acting on NAD(P)H, quinone or similar compound as acceptor;GO:0003924//GTPase activity;GO:0005525//GTP binding;GO:0016655//oxidoreductase activity, acting on NAD(P)H, quinone or similar compound as acceptor;GO:0003924//GTPase activity;GO:0005525//GTP binding;GO:0016655//oxidoreductase activity, acting on NAD(…	GO:0010155//regulation of proton transport;GO:0010258//NADH dehydrogenase complex (plastoquinone) assembly;GO:0019684//photosynthesis, light reaction;GO:0046777//protein autophosphorylation;GO:0055114//oxidation-reduction process;GO:0010155//regulation of proton transport;GO:0010258//NADH dehydrogenase complex (plastoquinone) assembly;GO:0019684//photosynthesis, light reaction;GO:0046777//protein…	gi|225431463|ref|XP_002280638.1|/4.70154E-41/PREDICTED: uncharacterized protein LOC100248924 [Vitis vinifera]
VIT_200s2342g00010	420	17.9929	144.189	2.95982	K08332	ko04140 Regulation of autophagy (Transport and catabolism)	GO:0000151//ubiquitin ligase complex;GO:0005634//nucleus;GO:0005737//cytoplasm;GO:0005886//plasma membrane	GO:0004842//ubiquitin-protein transferase activity;GO:0070696//transmembrane receptor protein serine/threonine kinase binding	GO:0016567//protein ubiquitination;GO:0046777//protein autophosphorylation;GO:0071215//cellular response to abscisic acid stimulus	gi|225469211|ref|XP_002263607.1|/1.44023E-42/PREDICTED: U-box domain-containing protein 9 [Vitis vinifera]
VIT_201s0011g04590	2624.52	12.0079	0.555915	-3.42557	K10661;K10658;K10658;K10661;K10658;K10661;K10658;K10661;K10661;K10658;K10661;K10658;K10658;K10661	ko04141 Protein processing in endoplasmic reticulum (Folding, sorting and degradation)	-	GO:0004842//ubiquitin-protein transferase activity;GO:0008270//zinc ion binding;GO:0004842//ubiquitin-protein transferase activity;GO:0008270//zinc ion binding;GO:0004842//ubiquitin-protein transferase activity;GO:0008270//zinc ion binding;GO:0004842//ubiquitin-protein transferase activity;GO:0008270//zinc ion binding;GO:0004842//ubiquitin-protein transferase activity;GO:0008270//zinc ion binding…	GO:0016567//protein ubiquitination;GO:0016567//protein ubiquitination;GO:0016567//protein ubiquitination;GO:0016567//protein ubiquitination;GO:0016567//protein ubiquitination;GO:0016567//protein ubiquitination;GO:0016567//protein ubiquitination	gi|297737730|emb|CBI26931.3|/1.52974E-138/unnamed protein product [Vitis vinifera]
VIT_202s0087g00690	4009	383.472	1082.06	1.49509	K12400	ko04142 Lysosome (Transport and catabolism)	GO:0005829//cytosol;GO:0005886//plasma membrane;GO:0009506//plasmodesma;GO:0030117//membrane coat	GO:0030276//clathrin binding	GO:0006007//glucose catabolic process;GO:0006487//protein N-linked glycosylation;GO:0006886//intracellular protein transport;GO:0016192//vesicle-mediated transport	gi|359474753|ref|XP_002269504.2|/0.0/PREDICTED: AP-4 complex subunit epsilon-like [Vitis vinifera]
VIT_201s0011g06290	2441.57	765.785	161.066	-2.24492	K14379;K14379;K14379;K14379	ko04142 Lysosome (Transport and catabolism)	GO:0005576//extracellular region;GO:0005667//transcription factor complex;GO:0005773//vacuole;GO:0008287//protein serine/threonine phosphatase complex;GO:0005576//extracellular region;GO:0005667//transcription factor complex;GO:0005773//vacuole;GO:0008287//protein serine/threonine phosphatase complex;GO:0005576//extracellular region;GO:0005667//transcription factor complex;GO:0005773//vacuole;GO:…	GO:0003677//DNA binding;GO:0003700//transcription factor activity, sequence-specific DNA binding;GO:0003993//acid phosphatase activity;GO:0004722//protein serine/threonine phosphatase activity;GO:0042802//identical protein binding;GO:0003677//DNA binding;GO:0003700//transcription factor activity, sequence-specific DNA binding;GO:0003993//acid phosphatase activity;GO:0004722//protein serine/threon…	GO:0006355//regulation of transcription, DNA-templated;GO:0006470//protein dephosphorylation;GO:0006771//riboflavin metabolic process;GO:0007623//circadian rhythm;GO:0009630//gravitropism;GO:0009704//de-etiolation;GO:0009740//gibberellic acid mediated signaling pathway;GO:0010017//red or far-red light signaling pathway;GO:0010167//response to nitrate;GO:0015706//nitrate transport;GO:0019497;GO:00…	gi|225424458|ref|XP_002285160.1|/4.76911E-133/PREDICTED: purple acid phosphatase 3 isoform 1 [Vitis vinifera]
VIT_201s0011g06280	2301	342.842	70.166	-2.27863	K14379;K14379	ko04142 Lysosome (Transport and catabolism)	GO:0005634//nucleus;GO:0009536//plastid;GO:0005634//nucleus;GO:0009536//plastid;GO:0005634//nucleus;GO:0009536//plastid;GO:0005634//nucleus;GO:0009536//plastid	GO:0005506//iron ion binding;GO:0016706//oxidoreductase activity, acting on paired donors, with incorporation or reduction of molecular oxygen, 2-oxoglutarate as one donor, and incorporation of one atom each of oxygen into both donors;GO:0031418//L-ascorbic acid binding;GO:0005506//iron ion binding;GO:0016706//oxidoreductase activity, acting on paired donors, with incorporation or reduction of mo…	GO:0055114//oxidation-reduction process;GO:0055114//oxidation-reduction process;GO:0055114//oxidation-reduction process;GO:0055114//oxidation-reduction process	gi|225424462|ref|XP_002285151.1|/0.0/PREDICTED: uncharacterized protein LOC100256078 isoform 1 [Vitis vinifera]
VIT_214s0006g01250	1349	75.7256	29.8328	-1.32599	K12486;K01537	ko04144 Endocytosis ( Transport and catabolism)	-	GO:0005515//protein binding	-	gi|225453173|ref|XP_002275235.1|/2.59586E-83/PREDICTED: probable ADP-ribosylation factor GTPase-activating protein AGD11 [Vitis vinifera]
VIT_204s0008g00690	2110.06	147.385	1117.19	2.91696	K12471;K12471	ko04144 Endocytosis (Transport and catabolism)	GO:0005739//mitochondrion;GO:0005768//endosome;GO:0005794//Golgi apparatus;GO:0005802//trans-Golgi network;GO:0016020//membrane;GO:0005739//mitochondrion;GO:0005768//endosome;GO:0005794//Golgi apparatus;GO:0005802//trans-Golgi network;GO:0016020//membrane	GO:0008375//acetylglucosaminyltransferase activity;GO:0008375//acetylglucosaminyltransferase activity	-	gi|147799468|emb|CAN70606.1|/0.0/hypothetical protein VITISV_040196 [Vitis vinifera]
VIT_214s0068g01760	1740.73	247.11	1092.98	2.14225	K13237;K02934;K02934;K13237;K02934;K13237;K05354;K13237;K02934	ko04146 Peroxisome (Transport and catabolism)	GO:0005777//peroxisome;GO:0005777//peroxisome;GO:0005777//peroxisome;GO:0005777//peroxisome	GO:0000166//nucleotide binding;GO:0004022//alcohol dehydrogenase (NAD) activity;GO:0000166//nucleotide binding;GO:0004022//alcohol dehydrogenase (NAD) activity;GO:0000166//nucleotide binding;GO:0004022//alcohol dehydrogenase (NAD) activity;GO:0004090//carbonyl reductase (NADPH) activity;GO:0000166//nucleotide binding;GO:0004022//alcohol dehydrogenase (NAD) activity;GO:0004090//carbonyl reductase …	GO:0055114//oxidation-reduction process;GO:0055114//oxidation-reduction process;GO:0006691//leukotriene metabolic process;GO:0006693//prostaglandin metabolic process;GO:0055114//oxidation-reduction process;GO:0006691//leukotriene metabolic process;GO:0006693//prostaglandin metabolic process;GO:0055114//oxidation-reduction process	gi|225451491|ref|XP_002271350.1|/1.88338E-93/PREDICTED: 7-alpha-hydroxysteroid dehydrogenase [Vitis vinifera]
VIT_203s0091g00580	1199	27.3631	61.3952	1.14809	K13348	ko04146 Peroxisome (Transport and catabolism)	GO:0005739//mitochondrion;GO:0005778//peroxisomal membrane;GO:0016021//integral component of membrane	-	GO:0009694//jasmonic acid metabolic process;GO:0009753//response to jasmonic acid	gi|225428951|ref|XP_002263780.1|/2.80723E-129/PREDICTED: PXMP2/4 family protein 4 [Vitis vinifera]
VIT_218s0072g00970	1687	46.2626	120.301	1.36695	K08669;K14810	ko04210 Apoptosis (Cell growth and death)	GO:0005634//nucleus;GO:0005739//mitochondrion;GO:0009535//chloroplast thylakoid membrane;GO:0009543//chloroplast thylakoid lumen	GO:0004252//serine-type endopeptidase activity;GO:0032440//2-alkenal reductase [NAD(P)] activity	GO:0006098//pentose-phosphate shunt;GO:0006508//proteolysis;GO:0010206//photosystem II repair;GO:0010304//PSII associated light-harvesting complex II catabolic process;GO:0015996//chlorophyll catabolic process;GO:0019761//glucosinolate biosynthetic process	gi|359493091|ref|XP_002267510.2|/3.91361E-139/PREDICTED: protease Do-like 1, chloroplastic-like [Vitis vinifera]
VIT_212s0059g00110	1310	105.815	43.2369	-1.2791	K19626;K06694	ko04310 Wnt signaling pathway (Signal transduction)	-	GO:0005515//protein binding	-	gi|297739109|emb|CBI28760.3|/0.0/unnamed protein product [Vitis vinifera]
VIT_212s0059g00050	2617	781.924	226.376	-1.78551	K19626;K06694;K15502	ko04310 Wnt signaling pathway (Signal transduction)	-	GO:0005515//protein binding	-	gi|225446910|ref|XP_002266647.1|/0.0/PREDICTED: ankyrin repeat-containing protein At5g02620-like [Vitis vinifera]
VIT_212s0028g04000	2741	140.179	36.0069	-1.94269	K19626;K06694;K15502;K15502;K06694;K19626	ko04310 Wnt signaling pathway (Signal transduction)	-	GO:0005515//protein binding;GO:0005515//protein binding	-	gi|359485365|ref|XP_003633264.1|/0.0/PREDICTED: ankyrin repeat-containing protein At3g12360-like [Vitis vinifera]
VIT_206s0004g05880	8297.71	374.441	812.038	1.11553	K02184;K14007;K02184;K14007;K14007;K02184;K14007;K02184;K02184;K14007;K02184;K14007;K02184;K14007	ko04320 Dorso-ventral axis formation ( Development)	-	GO:0008270//zinc ion binding;GO:0008270//zinc ion binding;GO:0008270//zinc ion binding;GO:0008270//zinc ion binding;GO:0008270//zinc ion binding;GO:0008270//zinc ion binding;GO:0008270//zinc ion binding	-	gi|297745966|emb|CBI16022.3|/0.0/unnamed protein product [Vitis vinifera]
VIT_208s0040g00380	2383.26	96.5571	448.71	2.2091	K16675;K16675;K16675;K16675;K16675;K16675	ko04391 Hippo signaling pathway - fly (Signal transduction)	GO:0005634//nucleus;GO:0005886//plasma membrane;GO:0005634//nucleus;GO:0005886//plasma membrane;GO:0005634//nucleus;GO:0005886//plasma membrane;GO:0005634//nucleus;GO:0005886//plasma membrane;GO:0005634//nucleus;GO:0005886//plasma membrane;GO:0005634//nucleus;GO:0005886//plasma membrane	GO:0008270//zinc ion binding;GO:0016740//transferase activity;GO:0032440//2-alkenal reductase [NAD(P)] activity;GO:0008270//zinc ion binding;GO:0016740//transferase activity;GO:0032440//2-alkenal reductase [NAD(P)] activity;GO:0008270//zinc ion binding;GO:0016740//transferase activity;GO:0032440//2-alkenal reductase [NAD(P)] activity;GO:0008270//zinc ion binding;GO:0016740//transferase activity;G…	GO:0055114//oxidation-reduction process;GO:0055114//oxidation-reduction process;GO:0055114//oxidation-reduction process;GO:0055114//oxidation-reduction process;GO:0055114//oxidation-reduction process;GO:0055114//oxidation-reduction process	gi|147844780|emb|CAN79042.1|/0.0/hypothetical protein VITISV_043755 [Vitis vinifera]
VIT_206s0004g02270	1231	163.964	51.5537	-1.65744	K08064	ko04612 Antigen processing and presentation (Immune system)	GO:0016602//CCAAT-binding factor complex	GO:0003677//DNA binding;GO:0003700//transcription factor activity, sequence-specific DNA binding	GO:0006355//regulation of transcription, DNA-templated	gi|297746308|emb|CBI16364.3|/3.03351E-159/unnamed protein product [Vitis vinifera]
VIT_209s0002g01590	1810	45.9666	6.52659	-2.70471	K08064;K08064;K08064	ko04612 Antigen processing and presentation (Immune system)	GO:0016602//CCAAT-binding factor complex;GO:0016602//CCAAT-binding factor complex;GO:0016602//CCAAT-binding factor complex	GO:0003677//DNA binding;GO:0003700//transcription factor activity, sequence-specific DNA binding;GO:0003677//DNA binding;GO:0003700//transcription factor activity, sequence-specific DNA binding;GO:0003677//DNA binding;GO:0003700//transcription factor activity, sequence-specific DNA binding	GO:0006355//regulation of transcription, DNA-templated;GO:0010262//somatic embryogenesis;GO:0006355//regulation of transcription, DNA-templated;GO:0010262//somatic embryogenesis;GO:0006355//regulation of transcription, DNA-templated;GO:0010262//somatic embryogenesis	gi|225442180|ref|XP_002274458.1|/0.0/PREDICTED: nuclear transcription factor Y subunit A-3 [Vitis vinifera]
VIT_208s0007g06700	1431.91	68.0045	24.0271	-1.47733	K03671;K03671;K03671;K03671;K03671;K03671	ko04621 NOD-like receptor signaling pathway (Immune system)	GO:0009534//chloroplast thylakoid;GO:0009570//chloroplast stroma;GO:0009534//chloroplast thylakoid;GO:0009570//chloroplast stroma;GO:0009534//chloroplast thylakoid;GO:0009570//chloroplast stroma;GO:0009534//chloroplast thylakoid;GO:0009570//chloroplast stroma;GO:0009534//chloroplast thylakoid;GO:0009570//chloroplast stroma;GO:0009534//chloroplast thylakoid;GO:0009570//chloroplast stroma	GO:0009055//electron carrier activity;GO:0015035//protein disulfide oxidoreductase activity;GO:0009055//electron carrier activity;GO:0015035//protein disulfide oxidoreductase activity;GO:0009055//electron carrier activity;GO:0015035//protein disulfide oxidoreductase activity;GO:0009055//electron carrier activity;GO:0015035//protein disulfide oxidoreductase activity;GO:0009055//electron carrier ac…	GO:0006662//glycerol ether metabolic process;GO:0045454//cell redox homeostasis;GO:0006662//glycerol ether metabolic process;GO:0045454//cell redox homeostasis;GO:0006662//glycerol ether metabolic process;GO:0045454//cell redox homeostasis;GO:0006662//glycerol ether metabolic process;GO:0045454//cell redox homeostasis;GO:0006662//glycerol ether metabolic process;GO:0045454//cell redox homeostasis…	gi|225441487|ref|XP_002275794.1|/1.78185E-69/PREDICTED: thioredoxin-like 3-1, chloroplastic isoform 1 [Vitis vinifera]
VIT_211s0016g05090	2739.1	15.1811	53.0368	1.76379	K11594;K11594;K11594	ko04622 RIG-I-like receptor signaling pathway (Immune system)	GO:0005730//nucleolus;GO:0005777//peroxisome;GO:0005886//plasma membrane;GO:0009536//plastid;GO:0005730//nucleolus;GO:0005777//peroxisome;GO:0005886//plasma membrane;GO:0005730//nucleolus;GO:0005777//peroxisome;GO:0005886//plasma membrane	GO:0003723//RNA binding;GO:0005524//ATP binding;GO:0008026//ATP-dependent helicase activity;GO:0003723//RNA binding;GO:0005524//ATP binding;GO:0008026//ATP-dependent helicase activity;GO:0003723//RNA binding;GO:0005524//ATP binding;GO:0008026//ATP-dependent helicase activity	-	gi|297738935|emb|CBI28180.3|/0.0/unnamed protein product [Vitis vinifera]
VIT_211s0052g00670	4111	557.125	1880.62	1.75401	K05768	ko04666 Fc gamma R-mediated phagocytosis (Immune system)	GO:0005829//cytosol	GO:0051015//actin filament binding	GO:0009737//response to abscisic acid;GO:0016482//cytoplasmic transport;GO:0030042//actin filament depolymerization;GO:0048767//root hair elongation;GO:0051014//actin filament severing;GO:0051764//actin crosslink formation	gi|297735417|emb|CBI17857.3|/0.0/unnamed protein product [Vitis vinifera]
VIT_204s0008g04400	550	0.45828	7.9733	2.99533	K13806	ko04723 Retrograde endocannabinoid signaling (Nervous system)	-	GO:0004806//triglyceride lipase activity	GO:0016042//lipid catabolic process;GO:0046486//glycerolipid metabolic process	gi|296081938|emb|CBI20943.3|/9.26916E-47/unnamed protein product [Vitis vinifera]
VIT_214s0006g01030	2124	87.8672	235.227	1.41431	K13806	ko04723 Retrograde endocannabinoid signaling (Nervous system)	GO:0005576//extracellular region;GO:0005886//plasma membrane	GO:0004806//triglyceride lipase activity;GO:0005516//calmodulin binding	GO:0006950//response to stress;GO:0016042//lipid catabolic process;GO:0046486//glycerolipid metabolic process	gi|225453195|ref|XP_002276386.1|/0.0/PREDICTED: uncharacterized protein LOC100262118 [Vitis vinifera]
VIT_206s0004g04010	2141	3.56177	96.1899	4.53321	K07195	ko04910 Insulin signaling pathway (Endocrine system)	GO:0000145//exocyst;GO:0005634//nucleus;GO:0005829//cytosol;GO:0090406//pollen tube	-	GO:0006887//exocytosis	gi|359479007|ref|XP_002281519.2|/0.0/PREDICTED: uncharacterized protein LOC100248374 [Vitis vinifera]
VIT_210s0116g00700	4650	274.704	1139.54	2.05004	K15173;K15083	ko04918 Thyroid hormone synthesis (Endocrine system)	-	GO:0003677//DNA binding;GO:0004386//helicase activity;GO:0005515//protein binding;GO:0005524//ATP binding;GO:0008270//zinc ion binding	GO:0009553//embryo sac development	gi|359494872|ref|XP_002263027.2|/0.0/PREDICTED: uncharacterized protein LOC100265351 [Vitis vinifera]
VIT_205s0049g00950	2058	208.15	90.9195	-1.18945	K08794;K04515	ko04921 Oxytocin signaling pathway (Endocrine system)	-	GO:0004674//protein serine/threonine kinase activity;GO:0004713//protein tyrosine kinase activity;GO:0005524//ATP binding	GO:0006468//protein phosphorylation;GO:0009069//serine family amino acid metabolic process;GO:0016036//cellular response to phosphate starvation	gi|225433124|ref|XP_002285162.1|/9.21017E-161/PREDICTED: phosphoenolpyruvate carboxylase kinase 1 [Vitis vinifera]
VIT_218s0001g06040	626	56.3648	151.961	1.42094	K17605	ko04931 Insulin resistance (Endocrine and metabolic diseases)	-	GO:0003755//peptidyl-prolyl cis-trans isomerase activity;GO:0019211//phosphatase activator activity	GO:0000413//protein peptidyl-prolyl isomerization	gi|147787396|emb|CAN62341.1|/1.41556E-15/hypothetical protein VITISV_035645 [Vitis vinifera]
VIT_218s0001g06200	2294	150.183	397.8	1.40163	K17605	ko04931 Insulin resistance (Endocrine and metabolic diseases)	GO:0009536//plastid	GO:0003755//peptidyl-prolyl cis-trans isomerase activity;GO:0019211//phosphatase activator activity	GO:0000413//protein peptidyl-prolyl isomerization	gi|359492453|ref|XP_002284086.2|/0.0/PREDICTED: serine/threonine-protein phosphatase 2A activator-like [Vitis vinifera]
VIT_219s0014g02850	756	2.66262	15.9153	2.33288	K10418	ko04962 Vasopressin-regulated water reabsorption ( Excretory system)	GO:0005875//microtubule associated complex	-	GO:0007017//microtubule-based process	gi|302143018|emb|CBI20313.3|/1.43388E-74/unnamed protein product [Vitis vinifera]
VIT_211s0016g03760	4114	295.107	647.494	1.13199	K10418;K10418;K10418;K10418;K10418;K10418;K10418;K10418;K10418;K10418	ko04962 Vasopressin-regulated water reabsorption ( Excretory system)	-	GO:0045300//acyl-[acyl-carrier-protein] desaturase activity;GO:0046914//transition metal ion binding;GO:0045300//acyl-[acyl-carrier-protein] desaturase activity;GO:0046914//transition metal ion binding;GO:0045300//acyl-[acyl-carrier-protein] desaturase activity;GO:0046914//transition metal ion binding;GO:0045300//acyl-[acyl-carrier-protein] desaturase activity;GO:0046914//transition metal ion bin…	GO:0006631//fatty acid metabolic process;GO:0055114//oxidation-reduction process;GO:0006631//fatty acid metabolic process;GO:0055114//oxidation-reduction process;GO:0006631//fatty acid metabolic process;GO:0055114//oxidation-reduction process;GO:0006631//fatty acid metabolic process;GO:0055114//oxidation-reduction process;GO:0006631//fatty acid metabolic process;GO:0055114//oxidation-reduction pr…	gi|359484356|ref|XP_002280856.2|/0.0/PREDICTED: uncharacterized protein LOC100250746 [Vitis vinifera]
VIT_217s0000g08530	4615.1	233.877	80.1725	-1.53728	K13855;K13862;K13862;K13855;K13862;K13855	ko04970 Salivary secretion (Digestive system)	GO:0005768//endosome;GO:0005773//vacuole;GO:0016021//integral component of membrane;GO:0016328//lateral plasma membrane;GO:0043674//columella;GO:0005768//endosome;GO:0005773//vacuole;GO:0016021//integral component of membrane;GO:0016328//lateral plasma membrane;GO:0043674//columella;GO:0005768//endosome;GO:0005773//vacuole;GO:0016021//integral component of membrane;GO:0016328//lateral plasma memb…	GO:0005452//inorganic anion exchanger activity;GO:0080139//borate efflux transmembrane transporter activity;GO:0005452//inorganic anion exchanger activity;GO:0080139//borate efflux transmembrane transporter activity;GO:0005452//inorganic anion exchanger activity;GO:0080139//borate efflux transmembrane transporter activity	GO:0006821//chloride transport;GO:0015701//bicarbonate transport;GO:0035445//borate transmembrane transport;GO:0006821//chloride transport;GO:0010036//response to boron-containing substance;GO:0015701//bicarbonate transport;GO:0035445//borate transmembrane transport;GO:0006821//chloride transport;GO:0010036//response to boron-containing substance;GO:0015701//bicarbonate transport;GO:0035445//bora…	gi|225457015|ref|XP_002282501.1|/0.0/PREDICTED: probable boron transporter 2 [Vitis vinifera]
VIT_207s0031g01160	2131	17.3624	428.408	4.57647	K07213;K10752	ko04978 Mineral absorption (Digestive system)	GO:0005737//cytoplasm	GO:0046872//metal ion binding	GO:0030001//metal ion transport	gi|225438631|ref|XP_002281217.1|/9.08116E-84/PREDICTED: uncharacterized protein LOC100245736 isoform 1 [Vitis vinifera]
VIT_206s0004g04270	1407	43.2984	15.8121	-1.41835	K11251	ko05034 Alcoholism (Substance dependence)	GO:0000786//nucleosome;GO:0005634//nucleus	GO:0003677//DNA binding;GO:0046982//protein heterodimerization activity	GO:0006334//nucleosome assembly	gi|225435042|ref|XP_002284305.1|/7.09555E-44/PREDICTED: probable histone H2A.4 isoform 1 [Vitis vinifera]
VIT_214s0083g00960	14661.9	1152.85	2610.29	1.17857	K10691;K10691;K10691;K10691	ko05203 Viral carcinogenesis (Cancers)	GO:0005829//cytosol;GO:0009506//plasmodesma;GO:0016021//integral component of membrane;GO:0016023//cytoplasmic, membrane-bounded vesicle;GO:0005829//cytosol;GO:0009506//plasmodesma;GO:0016021//integral component of membrane;GO:0016023//cytoplasmic, membrane-bounded vesicle;GO:0005829//cytosol;GO:0009506//plasmodesma;GO:0016021//integral component of membrane;GO:0016023//cytoplasmic, membrane-boun…	GO:0003723//RNA binding;GO:0003964//RNA-directed DNA polymerase activity;GO:0004842//ubiquitin-protein transferase activity;GO:0008270//zinc ion binding;GO:0003723//RNA binding;GO:0003964//RNA-directed DNA polymerase activity;GO:0004842//ubiquitin-protein transferase activity;GO:0008270//zinc ion binding;GO:0003723//RNA binding;GO:0003964//RNA-directed DNA polymerase activity;GO:0004842//ubiquiti…	GO:0006278//RNA-dependent DNA replication;GO:0009620//response to fungus;GO:0009640//photomorphogenesis;GO:0009734//auxin-activated signaling pathway;GO:0009826//unidimensional cell growth;GO:0009926//auxin polar transport;GO:0010311//lateral root formation;GO:0016567//protein ubiquitination;GO:0048283//indeterminate inflorescence morphogenesis;GO:0006278//RNA-dependent DNA replication;GO:0009620…	gi|359488327|ref|XP_003633742.1|/0.0/PREDICTED: LOW QUALITY PROTEIN: auxin transport protein BIG-like [Vitis vinifera]
VIT_201s0011g04200	2515.86	178.467	387.706	1.11661	K13863	ko05206 MicroRNAs in cancer (Cancers)	GO:0016021//integral component of membrane;GO:0005634//nucleus;GO:0005739//mitochondrion;GO:0016021//integral component of membrane;GO:0005634//nucleus;GO:0005739//mitochondrion;GO:0016021//integral component of membrane;GO:0005634//nucleus;GO:0005739//mitochondrion;GO:0016021//integral component of membrane;GO:0005634//nucleus;GO:0005739//mitochondrion;GO:0016021//integral component of membrane;…	GO:0005313//L-glutamate transmembrane transporter activity;GO:0015180//L-alanine transmembrane transporter activity;GO:0015181//arginine transmembrane transporter activity;GO:0015189//L-lysine transmembrane transporter activity;GO:0003996//acyl-CoA ligase activity;GO:0005313//L-glutamate transmembrane transporter activity;GO:0015180//L-alanine transmembrane transporter activity;GO:0015181//argini…	GO:0003333//amino acid transmembrane transport;GO:0015808//L-alanine transport;GO:0015809//arginine transport;GO:0015813//L-glutamate transport;GO:0015819//lysine transport;GO:0003333//amino acid transmembrane transport;GO:0006826//iron ion transport;GO:0010106//cellular response to iron ion starvation;GO:0010167//response to nitrate;GO:0015706//nitrate transport;GO:0015808//L-alanine transport;G…	gi|297737761|emb|CBI26962.3|/0.0/unnamed protein product [Vitis vinifera]
VIT_213s0019g01430	2052	2380.16	23391.2	3.29649	K06758;K03283	L1 cell adhesion molecule like protein (Cell adhesion molecules and their ligands)	GO:0005618//cell wall;GO:0005730//nucleolus;GO:0005773//vacuole;GO:0005886//plasma membrane;GO:0009941//chloroplast envelope;GO:0022626//cytosolic ribosome;GO:0048046//apoplast	GO:0005524//ATP binding;GO:0032440//2-alkenal reductase [NAD(P)] activity	GO:0009408//response to heat;GO:0009409//response to cold;GO:0009615//response to virus;GO:0009617//response to bacterium;GO:0046686//response to cadmium ion;GO:0055114//oxidation-reduction process;GO:0080167//response to karrikin	gi|359486799|ref|XP_002283532.2|/0.0/PREDICTED: heat shock cognate 70 kDa protein isoform 2 [Vitis vinifera]
VIT_218s0089g00600	1784	98.9283	241.279	1.28094	K06758;K19613;K03283	L1 cell adhesion molecule like protein (Cell adhesion molecules and their ligands)	GO:0005622//intracellular	GO:0005515//protein binding;GO:0005524//ATP binding;GO:0017111//nucleoside-triphosphatase activity;GO:0043531//ADP binding	GO:0006952//defense response;GO:0007165//signal transduction;GO:0009058//biosynthetic process	gi|359493549|ref|XP_002268091.2|/0.0/PREDICTED: TMV resistance protein N-like [Vitis vinifera]
VIT_204s0008g02370	2104.53	182.55	52.419	-1.78807	K17964;K17710;K17964;K17710;K17964;K17964	leucine-rich PPR motif-containing protein, mitochondrial (Mitochondrial biogenesis)	GO:0005739//mitochondrion;GO:0005829//cytosol;GO:0009536//plastid;GO:0005739//mitochondrion;GO:0005829//cytosol;GO:0009536//plastid;GO:0005739//mitochondrion;GO:0005829//cytosol;GO:0009536//plastid;GO:0005739//mitochondrion;GO:0005829//cytosol;GO:0009536//plastid;GO:0005739//mitochondrion;GO:0005829//cytosol;GO:0009536//plastid;GO:0005739//mitochondrion;GO:0005829//cytosol;GO:0009536//plastid	GO:0003824//catalytic activity;GO:0005515//protein binding;GO:0003824//catalytic activity;GO:0003824//catalytic activity;GO:0003824//catalytic activity;GO:0005515//protein binding;GO:0003824//catalytic activity;GO:0003824//catalytic activity	GO:0016556//mRNA modification;GO:0019288//isopentenyl diphosphate biosynthetic process, methylerythritol 4-phosphate pathway;GO:0016556//mRNA modification;GO:0019288//isopentenyl diphosphate biosynthetic process, methylerythritol 4-phosphate pathway;GO:0016556//mRNA modification;GO:0019288//isopentenyl diphosphate biosynthetic process, methylerythritol 4-phosphate pathway;GO:0016556//mRNA modific…	gi|296081754|emb|CBI20759.3|/0.0/unnamed protein product [Vitis vinifera]
VIT_214s0060g01050	1993	58.8737	10.3561	-2.43845	K17964;K03452;K11000	leucine-rich PPR motif-containing protein, mitochondrial (Mitochondrial biogenesis)	GO:0009507//chloroplast	GO:0005515//protein binding	GO:0007020//microtubule nucleation;GO:0016556//mRNA modification	gi|225450565|ref|XP_002281942.1|/0.0/PREDICTED: pentatricopeptide repeat-containing protein At5g48910 isoform 1 [Vitis vinifera]
VIT_210s0116g00940	3596.42	764.479	4966.08	2.69857	K15601;K03021;K03021;K15601;K15601;K03021;K03021;K15601;K03021;K15601	lysine-specific demethylase 3 ( Oxidoreductases)	GO:0005886//plasma membrane;GO:0016021//integral component of membrane;GO:0016023//cytoplasmic, membrane-bounded vesicle;GO:0005886//plasma membrane;GO:0016021//integral component of membrane;GO:0016023//cytoplasmic, membrane-bounded vesicle;GO:0005886//plasma membrane;GO:0016021//integral component of membrane;GO:0016023//cytoplasmic, membrane-bounded vesicle;GO:0005886//plasma membrane;GO:00160…	-	-	gi|225444325|ref|XP_002264502.1|/0.0/PREDICTED: uncharacterized membrane protein C24H6.13 isoform 1 [Vitis vinifera]
VIT_218s0001g02420	2092.39	138.527	558.346	2.00616	K11450;K00924;K00924;K11450;K00924;K11450;K00924;K11450	lysine-specific histone demethylase 1A ( Oxidoreductases)	GO:0005576//extracellular region;GO:0005794//Golgi apparatus;GO:0009505//plant-type cell wall;GO:0005576//extracellular region;GO:0005794//Golgi apparatus;GO:0009505//plant-type cell wall;GO:0005576//extracellular region;GO:0005794//Golgi apparatus;GO:0009505//plant-type cell wall;GO:0005576//extracellular region;GO:0005794//Golgi apparatus;GO:0009505//plant-type cell wall	GO:0004190//aspartic-type endopeptidase activity;GO:0004190//aspartic-type endopeptidase activity;GO:0004190//aspartic-type endopeptidase activity;GO:0004190//aspartic-type endopeptidase activity	GO:0006508//proteolysis;GO:0006635//fatty acid beta-oxidation;GO:0016558//protein import into peroxisome matrix;GO:0048573//photoperiodism, flowering;GO:0006508//proteolysis;GO:0006508//proteolysis;GO:0006508//proteolysis	gi|359492489|ref|XP_002285867.2|/0.0/PREDICTED: aspartic proteinase Asp1-like [Vitis vinifera]
VIT_214s0083g01030	1262.85	97.4152	25.6123	-1.90198	K09264;K09264;K09264;K09264;K09264	MADS-box transcription factor, plant (Transcription factors)	GO:0005667//transcription factor complex;GO:0005667//transcription factor complex;GO:0005667//transcription factor complex;GO:0005667//transcription factor complex;GO:0005667//transcription factor complex	GO:0003677//DNA binding;GO:0003700//transcription factor activity, sequence-specific DNA binding;GO:0046983//protein dimerization activity;GO:0003677//DNA binding;GO:0003700//transcription factor activity, sequence-specific DNA binding;GO:0046983//protein dimerization activity;GO:0003677//DNA binding;GO:0003700//transcription factor activity, sequence-specific DNA binding;GO:0046983//protein dime…	GO:0006355//regulation of transcription, DNA-templated;GO:0006355//regulation of transcription, DNA-templated;GO:0006355//regulation of transcription, DNA-templated;GO:0006355//regulation of transcription, DNA-templated;GO:0006355//regulation of transcription, DNA-templated	gi|225451817|ref|XP_002281532.1|/5.86513E-95/PREDICTED: FUL-like protein isoform 2 [Vitis vinifera]
VIT_214s0060g01040	2728	55.8398	15.9153	-1.77172	K03452;K17964	magnesium/proton exchanger (Transporters)	-	-	-	gi|296089787|emb|CBI39606.3|/2.81879E-73/unnamed protein product [Vitis vinifera]
VIT_214s0006g00910	3293.1	90.9415	202.799	1.15165	K18577;K18577;K18577;K18577;K18577;K18577;K18577	mannosylglycoprotein endo-beta-mannosidase (Hydrolases)	GO:0009507//chloroplast;GO:0009507//chloroplast;GO:0009507//chloroplast;GO:0009507//chloroplast;GO:0009507//chloroplast;GO:0009507//chloroplast;GO:0009507//chloroplast	-	GO:0010150//leaf senescence;GO:0010228//vegetative to reproductive phase transition of meristem;GO:0010264//myo-inositol hexakisphosphate biosynthetic process;GO:0034599//cellular response to oxidative stress;GO:0072593//reactive oxygen species metabolic process;GO:0010150//leaf senescence;GO:0010228//vegetative to reproductive phase transition of meristem;GO:0010264//myo-inositol hexakisphosphat…	gi|296087133|emb|CBI33507.3|/0.0/unnamed protein product [Vitis vinifera]
VIT_207s0005g02300	3958.08	217.901	583.976	1.41967	K17573;K17573	meiosis arrest female protein 1 (Protein phosphatases and associated proteins)	GO:0005634//nucleus;GO:0005777//peroxisome;GO:0009507//chloroplast;GO:0005634//nucleus;GO:0005777//peroxisome;GO:0009507//chloroplast	GO:0003676//nucleic acid binding;GO:0008270//zinc ion binding;GO:0003676//nucleic acid binding;GO:0008270//zinc ion binding	-	gi|359479976|ref|XP_002273252.2|/0.0/PREDICTED: uncharacterized protein LOC100253767 [Vitis vinifera]
VIT_214s0060g00410	3268	391.466	890.772	1.18489	K17573	meiosis arrest female protein 1 (Protein phosphatases and associated proteins)	GO:0005634//nucleus;GO:0005777//peroxisome;GO:0009507//chloroplast	GO:0003676//nucleic acid binding;GO:0008270//zinc ion binding	GO:0010197//polar nucleus fusion	gi|359487696|ref|XP_002276596.2|/0.0/PREDICTED: uncharacterized protein LOC100242533 [Vitis vinifera]
VIT_203s0017g01120	2899.78	42.096	9.66404	-2.05445	K00599;K00599;K00599;K00599;K00599	methyltransferase-like protein 6 (Transferases)	GO:0005634//nucleus;GO:0005634//nucleus;GO:0005634//nucleus;GO:0005634//nucleus;GO:0005634//nucleus	-	-	gi|296087474|emb|CBI34063.3|/1.16527E-121/unnamed protein product [Vitis vinifera]
VIT_210s0003g00410	2423	114.922	749.367	2.69845	K08472	mlo protein (G protein-coupled receptors)	GO:0016021//integral component of membrane	GO:0005516//calmodulin binding	GO:0008219//cell death;GO:0009817//defense response to fungus, incompatible interaction;GO:0010150//leaf senescence;GO:0031348//negative regulation of defense response	gi|359483893|ref|XP_002273434.2|/0.0/PREDICTED: MLO-like protein 6-like [Vitis vinifera]
VIT_207s0031g02240	2579	180.021	757.213	2.06876	K08472	mlo protein (G protein-coupled receptors)	GO:0005739//mitochondrion;GO:0005886//plasma membrane;GO:0012505//endomembrane system;GO:0016021//integral component of membrane	GO:0005516//calmodulin binding	GO:0006952//defense response;GO:0008219//cell death;GO:0009607//response to biotic stimulus;GO:0010483//pollen tube reception	gi|225438432|ref|XP_002276608.1|/0.0/PREDICTED: MLO9 protein [Vitis vinifera]
VIT_200s0340g00060	817	16.6742	70.4509	2.03902	K08472	mlo protein (G protein-coupled receptors)	GO:0005769//early endosome;GO:0005794//Golgi apparatus;GO:0005886//plasma membrane;GO:0009504//cell plate	GO:0008810//cellulase activity	GO:0005982//starch metabolic process;GO:0005985//sucrose metabolic process;GO:0009624//response to nematode;GO:0009735//response to cytokinin;GO:0009826//unidimensional cell growth;GO:0042538//hyperosmotic salinity response;GO:0043622//cortical microtubule organization;GO:0048367//shoot system development	gi|359496482|ref|XP_002266444.2|/2.24711E-61/PREDICTED: endoglucanase 12-like [Vitis vinifera]
VIT_201s0011g06270	3160	199.327	1097.44	2.45727	K10767;K10767	mRNA N6-methyladenine demethylase (Oxidoreductases)	GO:0005634//nucleus;GO:0005829//cytosol;GO:0009536//plastid;GO:0005829//cytosol;GO:0009536//plastid	GO:0016706//oxidoreductase activity, acting on paired donors, with incorporation or reduction of molecular oxygen, 2-oxoglutarate as one donor, and incorporation of one atom each of oxygen into both donors;GO:0016706//oxidoreductase activity, acting on paired donors, with incorporation or reduction of molecular oxygen, 2-oxoglutarate as one donor, and incorporation of one atom each of oxygen into…	GO:0055114//oxidation-reduction process;GO:0055114//oxidation-reduction process	gi|225424456|ref|XP_002281644.1|/0.0/PREDICTED: uncharacterized protein LOC100252594 [Vitis vinifera]
VIT_210s0003g04040	1177	189.952	78.711	-1.26439	K15032	mTERF domain-containing protein, mitochondrial (Translation factors)	GO:0009507//chloroplast	-	-	gi|359483906|ref|XP_003633033.1|/5.35949E-157/PREDICTED: uncharacterized protein LOC100853685 [Vitis vinifera]
VIT_217s0000g09080	1843	35.0581	13.2897	-1.359	K09422;K09422;K09422	myb proto-oncogene protein, plant (Transcription factors)	GO:0000785//chromatin;GO:0000785//chromatin;GO:0000785//chromatin	GO:0003677//DNA binding;GO:0003682//chromatin binding;GO:0003677//DNA binding;GO:0003682//chromatin binding;GO:0003677//DNA binding;GO:0003682//chromatin binding	-	gi|225456920|ref|XP_002278063.1|/4.72135E-152/PREDICTED: transcription factor MYB39 [Vitis vinifera]
VIT_210s0116g00500	1890	117.318	19.0651	-2.5829	K09422	myb proto-oncogene protein, plant (Transcription factors)	GO:0000785//chromatin	GO:0003677//DNA binding;GO:0003682//chromatin binding	-	gi|147781464|emb|CAN76121.1|/2.78978E-36/hypothetical protein VITISV_033885 [Vitis vinifera]
VIT_219s0085g00050	1095	16.0454	1.07058	-3.30182	K09422	myb proto-oncogene protein, plant (Transcription factors)	GO:0000785//chromatin;GO:0005667//transcription factor complex	GO:0003677//DNA binding;GO:0003682//chromatin binding;GO:0003700//transcription factor activity, sequence-specific DNA binding	GO:0009751//response to salicylic acid;GO:0009753//response to jasmonic acid;GO:0009809//lignin biosynthetic process;GO:0009866//induced systemic resistance, ethylene mediated signaling pathway;GO:0045491//xylan metabolic process;GO:0045893//positive regulation of transcription, DNA-templated;GO:0071281//cellular response to iron ion;GO:0071732//cellular response to nitric oxide;GO:2000652//regul…	gi|297736165|emb|CBI24203.3|/0.0/unnamed protein product [Vitis vinifera]
VIT_208s0007g05030	1943	25.9534	1.60587	-3.57798	K09422	myb proto-oncogene protein, plant (Transcription factors)	GO:0000785//chromatin	GO:0003677//DNA binding;GO:0003682//chromatin binding	-	gi|225441199|ref|XP_002270359.1|/2.1676E-146/PREDICTED: transcription factor RAX1 [Vitis vinifera]
VIT_207s0005g04785	744	67.4937	325.657	2.26009	K10357	myosin V (Messenger RNA biogenesis)	GO:0005777//peroxisome;GO:0005794//Golgi apparatus;GO:0016459//myosin complex	GO:0003774//motor activity;GO:0003779//actin binding;GO:0005524//ATP binding;GO:0017137//Rab GTPase binding;GO:0030742//GTP-dependent protein binding	GO:0030036//actin cytoskeleton organization;GO:0030048//actin filament-based movement;GO:0048767//root hair elongation;GO:0051645//Golgi localization;GO:0051646//mitochondrion localization;GO:0060151//peroxisome localization	gi|147787358|emb|CAN64632.1|/2.18283E-145/hypothetical protein VITISV_040993 [Vitis vinifera]
VIT_207s0005g04790	3840.54	351.128	1575.7	2.16395	K10357;K10357;K10357;K10357;K10357;K10357	myosin V (Messenger RNA biogenesis)	GO:0005777//peroxisome;GO:0016459//myosin complex;GO:0005777//peroxisome;GO:0016459//myosin complex;GO:0005777//peroxisome;GO:0016459//myosin complex;GO:0005634//nucleus;GO:0005777//peroxisome;GO:0016459//myosin complex;GO:0005777//peroxisome;GO:0016459//myosin complex;GO:0005777//peroxisome;GO:0016459//myosin complex	GO:0003774//motor activity;GO:0003779//actin binding;GO:0005524//ATP binding;GO:0017137//Rab GTPase binding;GO:0030742//GTP-dependent protein binding;GO:0003774//motor activity;GO:0003779//actin binding;GO:0005524//ATP binding;GO:0017137//Rab GTPase binding;GO:0030742//GTP-dependent protein binding;GO:0003774//motor activity;GO:0003779//actin binding;GO:0005524//ATP binding;GO:0017137//Rab GTPase…	GO:0048767//root hair elongation;GO:0051645//Golgi localization;GO:0051646//mitochondrion localization;GO:0060151//peroxisome localization;GO:0048767//root hair elongation;GO:0051645//Golgi localization;GO:0051646//mitochondrion localization;GO:0060151//peroxisome localization;GO:0048767//root hair elongation;GO:0051645//Golgi localization;GO:0051646//mitochondrion localization;GO:0060151//peroxi…	gi|297744256|emb|CBI37226.3|/0.0/unnamed protein product [Vitis vinifera]
VIT_211s0016g03010	2562	429.607	131.973	-1.6981	K01301	N-acetylated-alpha-linked acidic dipeptidase (Hydrolases)	GO:0005773//vacuole;GO:0005886//plasma membrane	GO:0004180//carboxypeptidase activity;GO:0016805//dipeptidase activity;GO:0032440//2-alkenal reductase [NAD(P)] activity	GO:0006508//proteolysis;GO:0055114//oxidation-reduction process	gi|359484534|ref|XP_002283565.2|/0.0/PREDICTED: probable glutamate carboxypeptidase 2-like isoform 1 [Vitis vinifera]
VIT_206s0009g00690	3503.09	329.843	1265.75	1.93814	K08857;K08857;K08857;K08857;K08857	NIMA (never in mitosis gene a)-related kinase (Transferases)	GO:0055028//cortical microtubule;GO:0055028//cortical microtubule;GO:0043229//intracellular organelle;GO:0043229//intracellular organelle;GO:0055028//cortical microtubule	GO:0004674//protein serine/threonine kinase activity;GO:0004713//protein tyrosine kinase activity;GO:0005524//ATP binding;GO:0004674//protein serine/threonine kinase activity;GO:0004713//protein tyrosine kinase activity;GO:0005524//ATP binding;GO:0004674//protein serine/threonine kinase activity;GO:0005524//ATP binding;GO:0004674//protein serine/threonine kinase activity;GO:0005524//ATP binding;G…	GO:0006468//protein phosphorylation;GO:0009069//serine family amino acid metabolic process;GO:0009653//anatomical structure morphogenesis;GO:0009913//epidermal cell differentiation;GO:0043622//cortical microtubule organization;GO:0048468//cell development;GO:0006468//protein phosphorylation;GO:0009069//serine family amino acid metabolic process;GO:0009653//anatomical structure morphogenesis;GO:00…	gi|359479228|ref|XP_002274007.2|/0.0/PREDICTED: serine/threonine-protein kinase Nek5-like [Vitis vinifera]
VIT_202s0025g01720	1565	2996.61	8215.92	1.4549	K16726;K10457;K10442	nkyrin repeat domain-containing protein 17 (Chromosome)	GO:0005634//nucleus	-	GO:0000165//MAPK cascade;GO:0006499//N-terminal protein myristoylation;GO:0006612//protein targeting to membrane;GO:0009409//response to cold;GO:0009738//abscisic acid-activated signaling pathway;GO:0009862//systemic acquired resistance, salicylic acid mediated signaling pathway;GO:0009867//jasmonic acid mediated signaling pathway;GO:0010363//regulation of plant-type hypersensitive response;GO:00…	gi|225426282|ref|XP_002266388.1|/1.04054E-108/PREDICTED: uncharacterized protein LOC100252953 [Vitis vinifera]
VIT_204s0008g01380	2038	496.574	1402.13	1.49638	K14861;K07936	nucleolar pre-ribosomal-associated protein 1 (Ribosome biogenesis)	GO:0005634//nucleus;GO:0005774//vacuolar membrane;GO:0005886//plasma membrane;GO:0009507//chloroplast	-	GO:0015824//proline transport	gi|225429570|ref|XP_002280033.1|/0.0/PREDICTED: uncharacterized protein LOC100262760 [Vitis vinifera]
VIT_204s0008g02900	1789.65	328.636	136.607	-1.26265	K17609;K17609;K17609;K17609;K17609;K17609;K17609;K17609	nucleoredoxin (Oxidoreductases)	GO:0005634//nucleus;GO:0005829//cytosol;GO:0005634//nucleus;GO:0005829//cytosol;GO:0005634//nucleus;GO:0005829//cytosol;GO:0005634//nucleus;GO:0005829//cytosol;GO:0005634//nucleus;GO:0005829//cytosol;GO:0005634//nucleus;GO:0005829//cytosol;GO:0005634//nucleus;GO:0005829//cytosol;GO:0005634//nucleus;GO:0005829//cytosol	GO:0016209//antioxidant activity;GO:0047134//protein-disulfide reductase activity;GO:0016209//antioxidant activity;GO:0047134//protein-disulfide reductase activity;GO:0016209//antioxidant activity;GO:0047134//protein-disulfide reductase activity;GO:0016209//antioxidant activity;GO:0047134//protein-disulfide reductase activity;GO:0016209//antioxidant activity;GO:0047134//protein-disulfide reductas…	GO:0010183//pollen tube guidance;GO:0016036//cellular response to phosphate starvation;GO:0019375//galactolipid biosynthetic process;GO:0035556//intracellular signal transduction;GO:0045454//cell redox homeostasis;GO:0045892//negative regulation of transcription, DNA-templated;GO:0046686//response to cadmium ion;GO:0055114//oxidation-reduction process;GO:0080092//regulation of pollen tube growth;…	gi|296081801|emb|CBI20806.3|/0.0/unnamed protein product [Vitis vinifera]
VIT_206s0009g02450	1562	129.234	34.342	-1.89305	K13691	pathogen-inducible salicylic acid glucosyltransferase (Transferases)	-	GO:0047213//anthocyanidin 3-O-glucosyltransferase activity	GO:0009813//flavonoid biosynthetic process	gi|359479140|ref|XP_003632224.1|/0.0/PREDICTED: LOW QUALITY PROTEIN: UDP-glycosyltransferase 87A2-like [Vitis vinifera]
VIT_206s0004g07010	2710	166.934	74.8402	-1.15084	K17710	pentatricopeptide repeat domain-containing protein 1 (Transfer RNA biogenesis)	GO:0009507//chloroplast	-	-	gi|225434512|ref|XP_002278434.1|/0.0/PREDICTED: pentatricopeptide repeat-containing protein At2g30100, chloroplastic [Vitis vinifera]
VIT_214s0068g01650	5782.71	239.295	582.083	1.28024	K18730;K18730;K18730;K18730;K18730;K18730;K18730;K18730;K18730	PERQ amino acid-rich with GYF domain-containing protein (Messenger RNA biogenesis)	GO:0009507//chloroplast;GO:0009507//chloroplast;GO:0009507//chloroplast;GO:0009507//chloroplast;GO:0009507//chloroplast;GO:0009507//chloroplast;GO:0009507//chloroplast;GO:0009507//chloroplast;GO:0009507//chloroplast	GO:0005515//protein binding;GO:0005515//protein binding;GO:0005515//protein binding;GO:0005515//protein binding;GO:0005515//protein binding;GO:0005515//protein binding;GO:0005515//protein binding;GO:0005515//protein binding;GO:0005515//protein binding	-	gi|296082317|emb|CBI21322.3|/0.0/unnamed protein product [Vitis vinifera]
VIT_208s0007g02160	2486.43	194.64	76.4667	-1.34085	K01530;K01530;K01530;K01530	phospholipid-translocating ATPase (Hydrolases)	-	-	-	gi|147784936|emb|CAN77490.1|/3.10087E-88/hypothetical protein VITISV_010725 [Vitis vinifera]
VIT_213s0047g01210	4475.09	245.415	659.228	1.42327	K14802;K14802;K14802	phospholipid-transporting ATPase (Hydrolases)	GO:0005886//plasma membrane;GO:0016021//integral component of membrane;GO:0005886//plasma membrane;GO:0016021//integral component of membrane;GO:0005886//plasma membrane;GO:0016021//integral component of membrane	GO:0000287//magnesium ion binding;GO:0004012//phospholipid-translocating ATPase activity;GO:0005515//protein binding;GO:0005524//ATP binding;GO:0015662//ATPase activity, coupled to transmembrane movement of ions, phosphorylative mechanism;GO:0019829//cation-transporting ATPase activity;GO:0000287//magnesium ion binding;GO:0004012//phospholipid-translocating ATPase activity;GO:0005515//protein bin…	GO:0006612//protein targeting to membrane;GO:0006754//ATP biosynthetic process;GO:0006812//cation transport;GO:0009963//positive regulation of flavonoid biosynthetic process;GO:0010363//regulation of plant-type hypersensitive response;GO:0015917//aminophospholipid transport;GO:0006612//protein targeting to membrane;GO:0006754//ATP biosynthetic process;GO:0006812//cation transport;GO:0009963//posi…	gi|359487112|ref|XP_002271241.2|/0.0/PREDICTED: phospholipid-transporting ATPase 1-like [Vitis vinifera]
VIT_210s0003g02680	4379	422.089	116.388	-1.85306	K12123;K12123;K12123	phytochrome E	GO:0005634//nucleus;GO:0009365;GO:0016020//membrane;GO:0005634//nucleus;GO:0009365;GO:0016020//membrane;GO:0005634//nucleus;GO:0009365;GO:0016020//membrane	GO:0000155//phosphorelay sensor kinase activity;GO:0005524//ATP binding;GO:0008020//G-protein coupled photoreceptor activity;GO:0009883//red or far-red light photoreceptor activity;GO:0042803//protein homodimerization activity;GO:0000155//phosphorelay sensor kinase activity;GO:0005524//ATP binding;GO:0008020//G-protein coupled photoreceptor activity;GO:0009883//red or far-red light photoreceptor …	GO:0000160//phosphorelay signal transduction system;GO:0006346//methylation-dependent chromatin silencing;GO:0007187//G-protein coupled receptor signaling pathway, coupled to cyclic nucleotide second messenger;GO:0009409//response to cold;GO:0009584//detection of visible light;GO:0009585//red, far-red light phototransduction;GO:0009630//gravitropism;GO:0009638//phototropism;GO:0009649//entrainmen…	gi|225463382|ref|XP_002271671.1|/0.0/PREDICTED: phytochrome E [Vitis vinifera]
VIT_202s0025g01020	1984	27.1486	69.2605	1.33146	K09060;K09060;K09060;K09060;K09060;K09060;K09060;K09060;K09060	plant G-box-binding factor (Transcription factors Eukaryotic Type)	GO:0005667//transcription factor complex;GO:0005737//cytoplasm;GO:0005667//transcription factor complex;GO:0005829//cytosol;GO:0005667//transcription factor complex;GO:0005737//cytoplasm;GO:0005667//transcription factor complex;GO:0005829//cytosol;GO:0005667//transcription factor complex;GO:0005829//cytosol;GO:0005667//transcription factor complex;GO:0005737//cytoplasm;GO:0005667//transcription f…	GO:0003700//transcription factor activity, sequence-specific DNA binding;GO:0043565//sequence-specific DNA binding;GO:0003700//transcription factor activity, sequence-specific DNA binding;GO:0043565//sequence-specific DNA binding;GO:0003700//transcription factor activity, sequence-specific DNA binding;GO:0043565//sequence-specific DNA binding;GO:0003700//transcription factor activity, sequence-sp…	GO:0006355//regulation of transcription, DNA-templated;GO:0050896//response to stimulus;GO:0006355//regulation of transcription, DNA-templated;GO:0009637//response to blue light;GO:0009737//response to abscisic acid;GO:0006355//regulation of transcription, DNA-templated;GO:0050896//response to stimulus;GO:0006355//regulation of transcription, DNA-templated;GO:0009637//response to blue light;GO:00…	gi|359474054|ref|XP_003631394.1|/1.93906E-164/PREDICTED: common plant regulatory factor 1-like isoform 2 [Vitis vinifera]
VIT_204s0008g02750	1660	194.013	72.5547	-1.41135	K09060;K14432	plant G-box-binding factor (Transcription factors Eukaryotic Type)	GO:0005667//transcription factor complex	GO:0003700//transcription factor activity, sequence-specific DNA binding;GO:0042803//protein homodimerization activity;GO:0043565//sequence-specific DNA binding;GO:0046982//protein heterodimerization activity	GO:0006355//regulation of transcription, DNA-templated;GO:0071333//cellular response to glucose stimulus	gi|296081787|emb|CBI20792.3|/0.0/unnamed protein product [Vitis vinifera]
VIT_216s0098g00950	2640	47.3587	15.9695	-1.53216	K13199;K11267;K18443	plasminogen activator inhibitor 1 RNA-binding protein (Spliceosome)	GO:0009505//plant-type cell wall;GO:0009507//chloroplast;GO:0048046//apoplast	GO:0004252//serine-type endopeptidase activity;GO:0042802//identical protein binding	GO:0006508//proteolysis;GO:0009581//detection of external stimulus;GO:0009595//detection of biotic stimulus;GO:0016036//cellular response to phosphate starvation;GO:0019375//galactolipid biosynthetic process;GO:0042631//cellular response to water deprivation;GO:0043086//negative regulation of catalytic activity	gi|302143981|emb|CBI23086.3|/0.0/unnamed protein product [Vitis vinifera]
VIT_216s0022g02200	2518	86.9966	15.3387	-2.45691	K13199;K11267;K11262;K18443	plasminogen activator inhibitor 1 RNA-binding protein (Spliceosome)	GO:0005618//cell wall;GO:0016023//cytoplasmic, membrane-bounded vesicle;GO:0048046//apoplast	GO:0004252//serine-type endopeptidase activity;GO:0042802//identical protein binding	GO:0006508//proteolysis;GO:0008356//asymmetric cell division;GO:0043086//negative regulation of catalytic activity	gi|225455619|ref|XP_002270958.1|/0.0/PREDICTED: subtilisin-like protease [Vitis vinifera]
VIT_200s0194g00210	2153.77	72.8149	18.1513	-1.96798	K05389;K05389	potassium channel subfamily K, other eukaryote (Ion channels)	GO:0005774//vacuolar membrane;GO:0016021//integral component of membrane;GO:0005774//vacuolar membrane;GO:0016021//integral component of membrane	GO:0005509//calcium ion binding;GO:0015269//calcium-activated potassium channel activity;GO:0005509//calcium ion binding;GO:0015269//calcium-activated potassium channel activity	GO:0010029//regulation of seed germination;GO:0010119//regulation of stomatal movement;GO:0030007//cellular potassium ion homeostasis;GO:0051260//protein homooligomerization;GO:0071805//potassium ion transmembrane transport;GO:0010029//regulation of seed germination;GO:0010119//regulation of stomatal movement;GO:0030007//cellular potassium ion homeostasis;GO:0051260//protein homooligomerization;G…	gi|359495639|ref|XP_003635043.1|/0.0/PREDICTED: calcium-activated outward-rectifying potassium channel 1-like [Vitis vinifera]
VIT_203s0063g00680	3870	513.286	1455.38	1.50243	K06972;K06972	presequence protease (Hydrolases)	GO:0005739//mitochondrion;GO:0009570//chloroplast stroma;GO:0009941//chloroplast envelope;GO:0048046//apoplast;GO:0005739//mitochondrion;GO:0009570//chloroplast stroma;GO:0009941//chloroplast envelope;GO:0048046//apoplast	GO:0004222//metalloendopeptidase activity;GO:0008270//zinc ion binding;GO:0004222//metalloendopeptidase activity;GO:0008270//zinc ion binding	GO:0006508//proteolysis;GO:0009658//chloroplast organization;GO:0016485//protein processing;GO:0042744//hydrogen peroxide catabolic process;GO:0046686//response to cadmium ion;GO:0048481//ovule development;GO:0006508//proteolysis;GO:0009658//chloroplast organization;GO:0016485//protein processing;GO:0042744//hydrogen peroxide catabolic process;GO:0046686//response to cadmium ion;GO:0048481//ovule…	gi|225428772|ref|XP_002282024.1|/0.0/PREDICTED: presequence protease 2, chloroplastic/mitochondrial-like [Vitis vinifera]
VIT_200s0259g00120	2971.81	833.188	171.074	-2.27988	K04773;K04773	protease IV (Hydrolases)	GO:0009506//plasmodesma;GO:0016020//membrane;GO:0016023//cytoplasmic, membrane-bounded vesicle;GO:0005737//cytoplasm;GO:0009506//plasmodesma;GO:0016020//membrane	GO:0015198//oligopeptide transporter activity;GO:0015198//oligopeptide transporter activity	GO:0000271//polysaccharide biosynthetic process;GO:0006857//oligopeptide transport;GO:0006875//cellular metal ion homeostasis;GO:0009825//multidimensional cell growth;GO:0009932//cell tip growth;GO:0010817//regulation of hormone levels;GO:0043481//anthocyanin accumulation in tissues in response to UV light;GO:0048767//root hair elongation;GO:0055085//transmembrane transport;GO:0071555//cell wall …	gi|297735875|emb|CBI18634.3|/0.0/unnamed protein product [Vitis vinifera]
VIT_204s0023g00130	1929	15.4596	47.1074	1.56963	K17046;K17046;K17046;K17046;K17046;K17046;K17046;K17046;K17046	protein DEK (Chromosome )	GO:0005634//nucleus;GO:0005737//cytoplasm;GO:0005634//nucleus;GO:0005737//cytoplasm;GO:0005634//nucleus;GO:0005737//cytoplasm;GO:0005634//nucleus;GO:0005737//cytoplasm	-	-	gi|225431031|ref|XP_002279901.1|/0.0/PREDICTED: uncharacterized protein LOC100251233 [Vitis vinifera]
VIT_218s0001g08160	439	3.20796	104.817	4.78393	-		-	-	-	gi|302142118|emb|CBI19321.3|/3.01879E-39/unnamed protein product [Vitis vinifera]
VIT_210s0071g00320	2119	14.456	190.383	3.66333	-		-	-	-	gi|225463675|ref|XP_002275935.1|/4.24597E-125/PREDICTED: GEM-like protein 4 [Vitis vinifera]
VIT_216s0100g00470	2349	54.1634	658.243	3.58818	-		GO:0005739//mitochondrion	GO:0051087//chaperone binding	GO:0006301//postreplication repair;GO:0006816//calcium ion transport;GO:0006833//water transport;GO:0009651//response to salt stress;GO:0009750//response to fructose;GO:0030003//cellular cation homeostasis;GO:0048767//root hair elongation	gi|225455457|ref|XP_002279827.1|/1.39506E-158/PREDICTED: uncharacterized protein LOC100260667 [Vitis vinifera]
VIT_210s0116g00690	580	11.2132	117.788	3.32293	-		-	GO:0003677//DNA binding;GO:0004386//helicase activity;GO:0005524//ATP binding;GO:0008270//zinc ion binding	-	gi|296080907|emb|CBI18751.3|/1.41361E-20/unnamed protein product [Vitis vinifera]
VIT_201s0011g02790	609	14.1022	144.801	3.30423	-		-	-	-	gi|224108561|ref|XP_002314892.1|/7.76544E-18/predicted protein [Populus trichocarpa]
VIT_208s0007g08040	402	9.92546	101.873	3.28092	-		-	-	-	gi|297739702|emb|CBI29884.3|/1.85657E-7/unnamed protein product [Vitis vinifera]
VIT_211s0016g04920	942	168.061	1613.94	3.25878	-		GO:0016021//integral component of membrane;GO:0016021//integral component of membrane	-	GO:0009877//nodulation;GO:0009877//nodulation	gi|147797998|emb|CAN71779.1|/1.3035E-25/hypothetical protein VITISV_015688 [Vitis vinifera]
VIT_212s0057g00150	617	21.3983	164.464	2.90646	-		-	-	-	gi|225447651|ref|XP_002274988.1|/6.16591E-38/PREDICTED: uncharacterized protein LOC100256196 [Vitis vinifera]
VIT_206s0009g03670	1201	5.88799	47.8067	2.89566	-		-	-	-	gi|225436596|ref|XP_002279458.1|/2.2491E-174/PREDICTED: F-box protein At4g18380-like [Vitis vinifera]
VIT_208s0007g08020	457	72.5879	450.047	2.622	-		-	-	-	gi|225441732|ref|XP_002283137.1|/1.88017E-21/PREDICTED: uncharacterized protein LOC100255628 isoform 1 [Vitis vinifera]
VIT_208s0040g01820	447	59.692	356.885	2.56746	-		-	-	-	gi|359481374|ref|XP_003632612.1|/5.69852E-30/PREDICTED: uncharacterized protein LOC100248294 [Vitis vinifera]
VIT_202s0025g01670	2272.8	17.3506	104.488	2.54822	-		GO:0046658//anchored component of plasma membrane;GO:0046658//anchored component of plasma membrane;GO:0005634//nucleus;GO:0046658//anchored component of plasma membrane;GO:0005634//nucleus;GO:0005634//nucleus;GO:0046658//anchored component of plasma membrane	-	-	gi|225426292|ref|XP_002265286.1|/0.0/PREDICTED: uncharacterized protein LOC100259778 [Vitis vinifera]
VIT_200s0524g00010	472	15.3849	88.2823	2.47376	-		GO:0000151//ubiquitin ligase complex;GO:0005634//nucleus;GO:0005886//plasma membrane	GO:0004842//ubiquitin-protein transferase activity;GO:0070696//transmembrane receptor protein serine/threonine kinase binding	GO:0016567//protein ubiquitination;GO:0046777//protein autophosphorylation;GO:0071215//cellular response to abscisic acid stimulus	gi|225469211|ref|XP_002263607.1|/6.22188E-46/PREDICTED: U-box domain-containing protein 9 [Vitis vinifera]
VIT_206s0009g01620	950	864.604	4402.21	2.34729	-		GO:0009506//plasmodesma	-	-	gi|225436011|ref|XP_002273485.1|/1.40696E-110/PREDICTED: uncharacterized protein LOC100242686 [Vitis vinifera]
VIT_207s0005g01140	726	101.065	516.304	2.34586	-		-	GO:0004497//monooxygenase activity;GO:0005506//iron ion binding;GO:0009055//electron carrier activity;GO:0016705//oxidoreductase activity, acting on paired donors, with incorporation or reduction of molecular oxygen;GO:0020037//heme binding	GO:0055114//oxidation-reduction process	gi|225437501|ref|XP_002274824.1|/1.09016E-69/PREDICTED: uncharacterized protein LOC100245192 [Vitis vinifera]
VIT_215s0046g02110	876	620.074	3147.51	2.34254	-		-	-	GO:0009269//response to desiccation	gi|225454314|ref|XP_002277223.1|/3.48177E-81/PREDICTED: late embryogenesis abundant protein Lea14-A [Vitis vinifera]
VIT_211s0016g02760	1642	22.6354	115.029	2.31415	-		-	-	-	gi|225445017|ref|XP_002283086.1|/1.9391E-6/PREDICTED: arabinogalactan peptide 22 [Vitis vinifera]
VIT_208s0007g08010	441	44.7118	222.079	2.29652	-		-	-	-	gi|359481867|ref|XP_003632682.1|/9.07036E-15/PREDICTED: uncharacterized protein LOC100853831 [Vitis vinifera]
VIT_203s0088g01200	1459	76.6459	376.747	2.28808	-		GO:0005783//endoplasmic reticulum;GO:0009507//chloroplast	-	GO:0006457//protein folding;GO:0006984//ER-nucleus signaling pathway;GO:0009408//response to heat;GO:0009555//pollen development;GO:0009644//response to high light intensity;GO:0034976//response to endoplasmic reticulum stress;GO:0042542//response to hydrogen peroxide	gi|359475556|ref|XP_002268574.2|/0.0/PREDICTED: uncharacterized protein LOC100260026 [Vitis vinifera]
VIT_210s0003g05480	1980	19.0562	93.9466	2.26492	-		GO:0005634//nucleus;GO:0005829//cytosol;GO:0005886//plasma membrane;GO:0016021//integral component of membrane;GO:0005634//nucleus;GO:0005829//cytosol;GO:0005886//plasma membrane;GO:0009507//chloroplast;GO:0016021//integral component of membrane;GO:0005634//nucleus;GO:0005829//cytosol;GO:0005886//plasma membrane;GO:0009507//chloroplast;GO:0016021//integral component of membrane	GO:0005215//transporter activity;GO:0005215//transporter activity;GO:0005215//transporter activity	GO:0006810//transport;GO:0016126//sterol biosynthetic process;GO:0052541//plant-type cell wall cellulose metabolic process;GO:0052546//cell wall pectin metabolic process;GO:0006810//transport;GO:0016126//sterol biosynthetic process;GO:0052541//plant-type cell wall cellulose metabolic process;GO:0052546//cell wall pectin metabolic process;GO:0006810//transport;GO:0016126//sterol biosynthetic proce…	gi|147864826|emb|CAN83643.1|/1.69873E-163/hypothetical protein VITISV_004911 [Vitis vinifera]
VIT_216s0013g00630	904	9.58906	47.0868	2.22442	-		GO:0005634//nucleus	GO:0004693//cyclin-dependent protein serine/threonine kinase activity;GO:0019901//protein kinase binding	GO:0000079//regulation of cyclin-dependent protein serine/threonine kinase activity;GO:0009069//serine family amino acid metabolic process;GO:0010440//stomatal lineage progression;GO:0051301//cell division	gi|225454996|ref|XP_002278426.1|/2.35937E-100/PREDICTED: cyclin-U4-1 [Vitis vinifera]
VIT_202s0025g04130	1940.47	171.18	796.497	2.21406	-		GO:0005794//Golgi apparatus;GO:0009506//plasmodesma;GO:0016021//integral component of membrane;GO:0005794//Golgi apparatus;GO:0009506//plasmodesma;GO:0016021//integral component of membrane	GO:0004252//serine-type endopeptidase activity;GO:0004252//serine-type endopeptidase activity	GO:0006508//proteolysis;GO:0006508//proteolysis	gi|225426828|ref|XP_002283259.1|/3.93488E-107/PREDICTED: inactive rhomboid protein 1 isoform 1 [Vitis vinifera]
VIT_208s0056g00430	2018	25.1239	118.633	2.21175	-		-	-	-	gi|225439086|ref|XP_002265705.1|/0.0/PREDICTED: uncharacterized protein LOC100255300 [Vitis vinifera]
VIT_208s0040g02810	1710	90.9359	411.713	2.17109	-		GO:0009507//chloroplast;GO:0016021//integral component of membrane	-	GO:0002237//response to molecule of bacterial origin;GO:0010015//root morphogenesis	gi|225439825|ref|XP_002274179.1|/0.0/PREDICTED: protein GPR107-like [Vitis vinifera]
VIT_208s0007g04770	1030	42.2077	188.118	2.13979	-		GO:0005622//intracellular	GO:0008270//zinc ion binding	GO:0044237//cellular metabolic process	gi|225441153|ref|XP_002267645.1|/2.41157E-128/PREDICTED: zinc finger protein ZAT5 [Vitis vinifera]
VIT_204s0044g00486	1481	40.8099	181.941	2.13965	-		-	-	-	gi|225431607|ref|XP_002282783.1|/5.14151E-73/PREDICTED: uncharacterized protein LOC100259237 [Vitis vinifera]
VIT_200s2536g00010	425	8.31173	38.3368	2.12495	-		GO:0031225//anchored component of membrane	GO:0004190//aspartic-type endopeptidase activity;GO:0004601//peroxidase activity;GO:0020037//heme binding;GO:0046872//metal ion binding	GO:0006508//proteolysis;GO:0006865//amino acid transport;GO:0006979//response to oxidative stress;GO:0055114//oxidation-reduction process	gi|359496801|ref|XP_003635339.1|/4.08147E-50/PREDICTED: aspartic proteinase-like protein 1-like [Vitis vinifera]
VIT_201s0026g01020	3120.23	96.2207	416.717	2.10754	-		GO:0030117//membrane coat;GO:0030117//membrane coat	GO:0005515//protein binding;GO:0005515//protein binding	GO:0006886//intracellular protein transport;GO:0016192//vesicle-mediated transport;GO:0006886//intracellular protein transport;GO:0016192//vesicle-mediated transport	gi|296086478|emb|CBI32067.3|/0.0/unnamed protein product [Vitis vinifera]
VIT_206s0004g02560	886	9015.26	38157.4	2.08144	-		GO:0005576//extracellular region	-	-	gi|225435369|ref|XP_002285303.1|/8.0247E-113/PREDICTED: ripening-related protein grip22 [Vitis vinifera]
VIT_208s0032g00930	2190.57	499.709	2053.1	2.03729	-		GO:0005576//extracellular region;GO:0005773//vacuole;GO:0005576//extracellular region;GO:0005773//vacuole	-	GO:0007155//cell adhesion;GO:0007155//cell adhesion	gi|225439352|ref|XP_002270606.1|/0.0/PREDICTED: fasciclin-like arabinogalactan protein 17 [Vitis vinifera]
VIT_211s0206g00080	1618	97.5411	400.743	2.03169	-		GO:0005634//nucleus;GO:0005634//nucleus	GO:0005516//calmodulin binding;GO:0005516//calmodulin binding	-	gi|359484785|ref|XP_003633161.1|/0.0/PREDICTED: uncharacterized protein LOC100255894 [Vitis vinifera]
VIT_219s0090g00020	3674	84.3054	341.587	2.01061	-		GO:0010005//cortical microtubule, transverse to long axis;GO:0045298//tubulin complex	GO:0008017//microtubule binding;GO:0008233//peptidase activity	GO:0000226//microtubule cytoskeleton organization;GO:0006396//RNA processing;GO:0006508//proteolysis;GO:0007275//multicellular organism development;GO:0009826//unidimensional cell growth;GO:0010031//circumnutation;GO:0022402//cell cycle process	gi|359494115|ref|XP_002281360.2|/0.0/PREDICTED: microtubule-associated protein TORTIFOLIA1-like [Vitis vinifera]
VIT_218s0072g00550	2440	463.816	1858.83	2.00133	-		-	GO:0005515//protein binding	-	gi|296081181|emb|CBI18207.3|/0.0/unnamed protein product [Vitis vinifera]
VIT_219s0090g01120	1737	16.7822	68.6633	1.99328	-		GO:0005739//mitochondrion;GO:0005886//plasma membrane;GO:0005634//nucleus;GO:0005739//mitochondrion;GO:0005886//plasma membrane;GO:0005634//nucleus;GO:0005739//mitochondrion;GO:0005886//plasma membrane	-	GO:0009409//response to cold;GO:0009414//response to water deprivation;GO:0009737//response to abscisic acid;GO:0035265//organ growth;GO:0042538//hyperosmotic salinity response;GO:0051302//regulation of cell division;GO:0009409//response to cold;GO:0009414//response to water deprivation;GO:0009737//response to abscisic acid;GO:0035265//organ growth;GO:0042538//hyperosmotic salinity response;GO:00…	gi|225460869|ref|XP_002277314.1|/2.43931E-138/PREDICTED: uncharacterized protein LOC100245205 [Vitis vinifera]
VIT_215s0021g01280	1630	29.4226	117.047	1.96965	-		GO:0005634//nucleus	GO:0004693//cyclin-dependent protein serine/threonine kinase activity;GO:0019901//protein kinase binding	GO:0000079//regulation of cyclin-dependent protein serine/threonine kinase activity;GO:0009069//serine family amino acid metabolic process;GO:0010054//trichoblast differentiation;GO:0010440//stomatal lineage progression	gi|225453342|ref|XP_002271136.1|/3.73345E-105/PREDICTED: cyclin-U4-1 [Vitis vinifera]
VIT_203s0038g03860	1175	392.901	1504.63	1.93549	-		GO:0005576//extracellular region;GO:0009505//plant-type cell wall	-	GO:0080167//response to karrikin	gi|359474957|ref|XP_003631558.1|/0.0/PREDICTED: uncharacterized protein LOC100853859 [Vitis vinifera]
VIT_213s0073g00590	268	22.8144	88.8669	1.93308	-		GO:0005739//mitochondrion	-	-	gi|57013900|ref|YP_173374.1|/3.52446E-22/hypothetical protein NitaMp027 [Nicotiana tabacum]
VIT_211s0206g00070	2367	172.082	655.52	1.92573	-		GO:0005634//nucleus	GO:0005516//calmodulin binding	-	gi|359484785|ref|XP_003633161.1|/0.0/PREDICTED: uncharacterized protein LOC100255894 [Vitis vinifera]
VIT_202s0025g03310	2315	52.0539	198.906	1.92143	-		GO:0016021//integral component of membrane;GO:0016023//cytoplasmic, membrane-bounded vesicle;GO:0016021//integral component of membrane;GO:0016023//cytoplasmic, membrane-bounded vesicle	GO:0015137//citrate transmembrane transporter activity;GO:0015137//citrate transmembrane transporter activity	GO:0015746//citrate transport;GO:0055085//transmembrane transport;GO:0015746//citrate transport;GO:0055085//transmembrane transport	gi|359474003|ref|XP_002276077.2|/0.0/PREDICTED: putative transporter arsB isoform 1 [Vitis vinifera]
VIT_218s0001g07290	4820.92	328.737	1240.58	1.91401	-		GO:0005634//nucleus;GO:0005886//plasma membrane;GO:0005634//nucleus;GO:0005886//plasma membrane;GO:0005634//nucleus;GO:0005886//plasma membrane	-	-	gi|359492479|ref|XP_003634420.1|/0.0/PREDICTED: uncharacterized protein LOC100254008 [Vitis vinifera]
VIT_205s0020g04110	845.23	495.914	1822.4	1.87636	-		-	-	GO:0009409//response to cold;GO:0010114//response to red light;GO:0010218//response to far red light;GO:0010224//response to UV-B;GO:0010380//regulation of chlorophyll biosynthetic process;GO:0080167//response to karrikin;GO:0009409//response to cold;GO:0010114//response to red light;GO:0010218//response to far red light;GO:0010224//response to UV-B;GO:0010380//regulation of chlorophyll biosynthe…	gi|225432790|ref|XP_002283398.1|/8.56662E-89/PREDICTED: early light-induced protein, chloroplastic [Vitis vinifera]
VIT_201s0011g05790	3334	521.007	1898.65	1.86436	-		GO:0005634//nucleus;GO:0005739//mitochondrion;GO:0005886//plasma membrane;GO:0010005//cortical microtubule, transverse to long axis;GO:0045298//tubulin complex	GO:0008017//microtubule binding	GO:0007010//cytoskeleton organization;GO:0009832//plant-type cell wall biogenesis;GO:0010051//xylem and phloem pattern formation;GO:0010075//regulation of meristem growth	gi|225424380|ref|XP_002284904.1|/0.0/PREDICTED: microtubule-associated protein 70-2 [Vitis vinifera]
VIT_213s0067g00700	1541.3	272.859	993.695	1.86228	-		GO:0005739//mitochondrion;GO:0005739//mitochondrion;GO:0005739//mitochondrion;GO:0005739//mitochondrion;GO:0005737//cytoplasm;GO:0005737//cytoplasm	GO:0016787//hydrolase activity;GO:0016787//hydrolase activity;GO:0016787//hydrolase activity;GO:0016787//hydrolase activity;GO:0016787//hydrolase activity;GO:0016787//hydrolase activity	GO:0008152//metabolic process;GO:0009970//cellular response to sulfate starvation;GO:0008152//metabolic process;GO:0009970//cellular response to sulfate starvation;GO:0008152//metabolic process;GO:0009970//cellular response to sulfate starvation;GO:0008152//metabolic process;GO:0009970//cellular response to sulfate starvation;GO:0008152//metabolic process;GO:0009970//cellular response to sulfate …	gi|225448408|ref|XP_002273406.1|/2.17219E-93/PREDICTED: uncharacterized protein LOC100257064 isoform 1 [Vitis vinifera]
VIT_209s0002g06400	317	43.4899	159.646	1.86131	-		-	-	-	gi|317106740|dbj|BAJ53236.1|/3.20691E-12/JHL06P13.17 [Jatropha curcas]
VIT_200s0229g00050	1079	59.3786	216.778	1.85735	-		GO:0005622//intracellular;GO:0016020//membrane	GO:0008270//zinc ion binding	-	gi|359495992|ref|XP_003635129.1|/2.63663E-139/PREDICTED: zinc finger protein ZAT4-like [Vitis vinifera]
VIT_206s0009g01600	4594	1362.43	4907.05	1.8482	-		GO:0005886//plasma membrane;GO:0009506//plasmodesma	-	GO:0006486//protein glycosylation;GO:0006635//fatty acid beta-oxidation;GO:0016558//protein import into peroxisome matrix	gi|225436013|ref|XP_002273628.1|/0.0/PREDICTED: uncharacterized protein LOC100264970 isoform 1 [Vitis vinifera]
VIT_201s0150g00060	1307	19.2533	70.7642	1.84481	-		GO:0005774//vacuolar membrane;GO:0005886//plasma membrane;GO:0016023//cytoplasmic, membrane-bounded vesicle	-	-	gi|225425256|ref|XP_002269974.1|/2.35413E-116/PREDICTED: heme-binding protein 2-like [Vitis vinifera]
VIT_200s0125g00020	257	30.6059	110.747	1.83453	-		-	-	-	gi|388514333|gb|AFK45228.1|/1.60567E-7/unknown [Medicago truncatula]
VIT_214s0066g01190	1062	94.0568	334.484	1.82353	-		-	-	GO:0006950//response to stress;GO:0080167//response to karrikin	gi|225452448|ref|XP_002277810.1|/7.24414E-147/PREDICTED: uncharacterized protein LOC100254241 [Vitis vinifera]
VIT_207s0031g01630	763.94	398.59	1336.29	1.74369	-		GO:0005634//nucleus;GO:0005886//plasma membrane;GO:0005634//nucleus;GO:0005886//plasma membrane;GO:0005634//nucleus;GO:0005886//plasma membrane	-	GO:0006661//phosphatidylinositol biosynthetic process;GO:0010264//myo-inositol hexakisphosphate biosynthetic process;GO:0006661//phosphatidylinositol biosynthetic process;GO:0010264//myo-inositol hexakisphosphate biosynthetic process;GO:0006661//phosphatidylinositol biosynthetic process;GO:0010264//myo-inositol hexakisphosphate biosynthetic process	gi|225438551|ref|XP_002279833.1|/6.9206E-43/PREDICTED: uncharacterized protein LOC100245593 [Vitis vinifera]
VIT_200s0434g00090	586	45.3586	149.927	1.71119	-		GO:0031225//anchored component of membrane	GO:0004190//aspartic-type endopeptidase activity;GO:0004601//peroxidase activity;GO:0020037//heme binding;GO:0046872//metal ion binding	GO:0006508//proteolysis;GO:0006865//amino acid transport;GO:0006979//response to oxidative stress;GO:0055114//oxidation-reduction process	gi|359496801|ref|XP_003635339.1|/1.29523E-82/PREDICTED: aspartic proteinase-like protein 1-like [Vitis vinifera]
VIT_200s0587g00030	2496	124.239	397.876	1.67427	-		-	GO:0003824//catalytic activity	GO:0009611//response to wounding;GO:0009620//response to fungus;GO:0009695//jasmonic acid biosynthetic process;GO:0009753//response to jasmonic acid	gi|225470342|ref|XP_002269338.1|/0.0/PREDICTED: CBS domain-containing protein CBSX5 [Vitis vinifera]
VIT_200s0370g00020	1812	243.588	776.915	1.6708	-		GO:0009941//chloroplast envelope;GO:0030130//clathrin coat of trans-Golgi network vesicle;GO:0030132//clathrin coat of coated pit	GO:0005198//structural molecule activity	GO:0006886//intracellular protein transport;GO:0016192//vesicle-mediated transport	gi|359496589|ref|XP_003635272.1|/9.65984E-151/PREDICTED: clathrin light chain 1-like [Vitis vinifera]
VIT_218s0086g00520	601	38.9761	125.296	1.66905	-		-	-	-	gi|147776675|emb|CAN59943.1|/2.29912E-72/hypothetical protein VITISV_018779 [Vitis vinifera]
VIT_215s0021g02730	5249.28	196.983	627.737	1.66899	-		GO:0005730//nucleolus;GO:0005730//nucleolus	GO:0003899//DNA-directed RNA polymerase activity;GO:0003899//DNA-directed RNA polymerase activity	GO:0006144//purine nucleobase metabolic process;GO:0006206//pyrimidine nucleobase metabolic process;GO:0006351//transcription, DNA-templated;GO:0048208//COPII vesicle coating;GO:0006144//purine nucleobase metabolic process;GO:0006206//pyrimidine nucleobase metabolic process;GO:0006351//transcription, DNA-templated;GO:0048208//COPII vesicle coating	gi|225453533|ref|XP_002275713.1|/0.0/PREDICTED: uncharacterized protein LOC100251258 [Vitis vinifera]
VIT_202s0025g00150	4151	83.4933	265.574	1.66208	-		GO:0005634//nucleus;GO:0009536//plastid	GO:0005515//protein binding	-	gi|225426184|ref|XP_002279382.1|/0.0/PREDICTED: BTB/POZ domain-containing protein At1g63850 [Vitis vinifera]
VIT_215s0048g01420	1359	87.2174	276.774	1.65904	-		-	GO:0005507//copper ion binding;GO:0009055//electron carrier activity	-	gi|225453816|ref|XP_002276737.1|/2.42086E-66/PREDICTED: early nodulin-like protein 1-like [Vitis vinifera]
VIT_213s0019g03990	1951.42	328.038	1034.4	1.655	-		GO:0005674//transcription factor TFIIF complex;GO:0005674//transcription factor TFIIF complex;GO:0005674//transcription factor TFIIF complex;GO:0005674//transcription factor TFIIF complex	GO:0003824//catalytic activity;GO:0005524//ATP binding;GO:0003824//catalytic activity;GO:0005524//ATP binding;GO:0003824//catalytic activity;GO:0005524//ATP binding;GO:0003824//catalytic activity;GO:0005524//ATP binding	GO:0006367//transcription initiation from RNA polymerase II promoter;GO:0006612//protein targeting to membrane;GO:0009414//response to water deprivation;GO:0009611//response to wounding;GO:0009723//response to ethylene;GO:0009733//response to auxin;GO:0009738//abscisic acid-activated signaling pathway;GO:0009753//response to jasmonic acid;GO:0009805//coumarin biosynthetic process;GO:0010363//regu…	gi|147863867|emb|CAN81117.1|/6.3893E-133/hypothetical protein VITISV_005903 [Vitis vinifera]
VIT_207s0005g02710	2525	58.3694	182.911	1.6375	-		GO:0016023//cytoplasmic, membrane-bounded vesicle;GO:0016023//cytoplasmic, membrane-bounded vesicle	-	-	gi|225437795|ref|XP_002281632.1|/0.0/PREDICTED: uncharacterized protein LOC100255480 isoform 1 [Vitis vinifera]
VIT_214s0060g02390	1015	14.9317	47.1889	1.62025	-		GO:0000326//protein storage vacuole;GO:0005783//endoplasmic reticulum;GO:0005886//plasma membrane	GO:0005515//protein binding	GO:0006612//protein targeting to membrane;GO:0006623//protein targeting to vacuole;GO:0006862//nucleotide transport;GO:0006888//ER to Golgi vesicle-mediated transport;GO:0009611//response to wounding;GO:0009612//response to mechanical stimulus;GO:0009646//response to absence of light;GO:0010200//response to chitin;GO:0010363//regulation of plant-type hypersensitive response;GO:0015696//ammonium t…	gi|225450819|ref|XP_002283998.1|/5.32073E-75/PREDICTED: uncharacterized protein LOC100245905 [Vitis vinifera]
VIT_206s0004g04350	1991.76	57.8471	178.052	1.61163	-		GO:0005634//nucleus;GO:0005739//mitochondrion;GO:0005783//endoplasmic reticulum;GO:0005634//nucleus;GO:0005739//mitochondrion;GO:0005783//endoplasmic reticulum;GO:0005634//nucleus;GO:0005739//mitochondrion;GO:0005783//endoplasmic reticulum;GO:0005634//nucleus;GO:0005739//mitochondrion;GO:0005783//endoplasmic reticulum;GO:0005634//nucleus;GO:0005739//mitochondrion;GO:0005783//endoplasmic reticulum…	-	-	gi|225435022|ref|XP_002284193.1|/8.20422E-110/PREDICTED: uncharacterized protein LOC100260346 [Vitis vinifera]
VIT_216s0022g01830	2780	183.322	559.663	1.60691	-		GO:0005739//mitochondrion;GO:0009507//chloroplast;GO:0005739//mitochondrion;GO:0009507//chloroplast	-	GO:0006499//N-terminal protein myristoylation;GO:0006865//amino acid transport;GO:0009414//response to water deprivation;GO:0009611//response to wounding;GO:0009630//gravitropism;GO:0009723//response to ethylene;GO:0009733//response to auxin;GO:0009738//abscisic acid-activated signaling pathway;GO:0009753//response to jasmonic acid;GO:0010150//leaf senescence;GO:0035556//intracellular signal tran…	gi|225455567|ref|XP_002268776.1|/0.0/PREDICTED: uncharacterized protein LOC100244660 [Vitis vinifera]
VIT_217s0053g00210	2155	150.175	455.073	1.59548	-		-	-	GO:0016998//cell wall macromolecule catabolic process	gi|225457497|ref|XP_002267776.1|/0.0/PREDICTED: uncharacterized protein LOC100266699 [Vitis vinifera]
VIT_202s0241g00100	1240	9.36271	29.2769	1.58256	-		GO:0005634//nucleus;GO:0016021//integral component of membrane	GO:0008137//NADH dehydrogenase (ubiquinone) activity	GO:0006120//mitochondrial electron transport, NADH to ubiquinone;GO:0006744//ubiquinone biosynthetic process;GO:0006814//sodium ion transport;GO:0015992//proton transport	gi|359474315|ref|XP_002266637.2|/7.12176E-112/PREDICTED: uncharacterized protein LOC100249883 [Vitis vinifera]
VIT_206s0004g06290	3293.68	216.434	648.32	1.58004	-		GO:0009536//plastid;GO:0009536//plastid;GO:0009536//plastid	GO:0004601//peroxidase activity;GO:0005515//protein binding;GO:0004601//peroxidase activity;GO:0005515//protein binding;GO:0004601//peroxidase activity	GO:0006396//RNA processing;GO:0006979//response to oxidative stress;GO:0044262//cellular carbohydrate metabolic process;GO:0044723;GO:0006396//RNA processing;GO:0006979//response to oxidative stress;GO:0044262//cellular carbohydrate metabolic process;GO:0044723;GO:0006396//RNA processing;GO:0006979//response to oxidative stress	gi|225434642|ref|XP_002279786.1|/5.22076E-154/PREDICTED: uncharacterized protein LOC100253483 [Vitis vinifera]
VIT_200s0250g00030	3679.94	65.8863	197.686	1.57618	-		GO:0005634//nucleus;GO:0005768//endosome;GO:0005794//Golgi apparatus;GO:0005802//trans-Golgi network;GO:0005634//nucleus;GO:0005768//endosome;GO:0005794//Golgi apparatus;GO:0005802//trans-Golgi network;GO:0005634//nucleus;GO:0005768//endosome;GO:0005794//Golgi apparatus;GO:0005802//trans-Golgi network;GO:0005634//nucleus;GO:0005768//endosome;GO:0005794//Golgi apparatus;GO:0005802//trans-Golgi net…	GO:0016757//transferase activity, transferring glycosyl groups;GO:0016757//transferase activity, transferring glycosyl groups;GO:0016757//transferase activity, transferring glycosyl groups;GO:0016757//transferase activity, transferring glycosyl groups;GO:0016757//transferase activity, transferring glycosyl groups;GO:0016757//transferase activity, transferring glycosyl groups;GO:0016757//transfera…	GO:0009058//biosynthetic process;GO:0009058//biosynthetic process;GO:0009058//biosynthetic process;GO:0009058//biosynthetic process;GO:0009058//biosynthetic process;GO:0009058//biosynthetic process;GO:0009058//biosynthetic process	gi|225448875|ref|XP_002270269.1|/0.0/PREDICTED: uncharacterized protein LOC100254795 [Vitis vinifera]
VIT_218s0072g00950	2413	40.392	121.226	1.57095	-		GO:0016020//membrane;GO:0016020//membrane;GO:0016020//membrane;GO:0016020//membrane	GO:0015095//magnesium ion transmembrane transporter activity;GO:0015095//magnesium ion transmembrane transporter activity;GO:0015095//magnesium ion transmembrane transporter activity;GO:0015095//magnesium ion transmembrane transporter activity	GO:0015693//magnesium ion transport;GO:0015693//magnesium ion transport;GO:0015693//magnesium ion transport;GO:0015693//magnesium ion transport	gi|225460711|ref|XP_002270879.1|/6.88841E-164/PREDICTED: magnesium transporter NIPA2-like [Vitis vinifera]
VIT_204s0008g07260	1133	79.1599	235.062	1.56275	-		GO:0005634//nucleus	-	-	gi|225430563|ref|XP_002262758.1|/2.69893E-167/PREDICTED: uncharacterized protein LOC100257058 isoform 1 [Vitis vinifera]
VIT_218s0001g10360	1875	922.314	2711.17	1.55494	-		GO:0005886//plasma membrane	-	-	gi|225458647|ref|XP_002284845.1|/1.88323E-129/PREDICTED: uncharacterized protein LOC100254049 [Vitis vinifera]
VIT_208s0007g08520	486	33.6397	98.5373	1.53323	-		-	GO:0008234//cysteine-type peptidase activity	GO:0006508//proteolysis;GO:0009611//response to wounding;GO:0009620//response to fungus;GO:0009695//jasmonic acid biosynthetic process;GO:0009738//abscisic acid-activated signaling pathway;GO:0009753//response to jasmonic acid;GO:0010200//response to chitin;GO:0030968//endoplasmic reticulum unfolded protein response;GO:0035556//intracellular signal transduction	gi|359482285|ref|XP_003632749.1|/3.65768E-34/PREDICTED: uncharacterized protein LOC100267578 [Vitis vinifera]
VIT_204s0008g01230	1219	104.087	300.882	1.52582	-		GO:0005886//plasma membrane	-	GO:0044267//cellular protein metabolic process	gi|225429538|ref|XP_002279306.1|/2.16977E-102/PREDICTED: uncharacterized protein LOC100254397 [Vitis vinifera]
VIT_218s0041g02290	2352	46.3671	134.259	1.52135	-		-	-	-	gi|296089393|emb|CBI39212.3|/7.58056E-30/unnamed protein product [Vitis vinifera]
VIT_210s0003g01070	1918	185.666	531.808	1.51507	-		GO:0005773//vacuole;GO:0005773//vacuole	GO:0052692//raffinose alpha-galactosidase activity	GO:0008152//metabolic process	gi|225443831|ref|XP_002274664.1|/2.30054E-150/PREDICTED: uncharacterized protein LOC100258410 [Vitis vinifera]
VIT_207s0191g00220	1179.33	39.8063	112.538	1.48499	-		-	-	-	gi|225469792|ref|XP_002262747.1|/2.2993E-97/PREDICTED: uncharacterized protein LOC100251922 [Vitis vinifera]
VIT_202s0025g04160	5022.13	135.743	380.5	1.4828	-		GO:0005634//nucleus;GO:0005634//nucleus;GO:0005739//mitochondrion;GO:0043231//intracellular membrane-bounded organelle;GO:0043231//intracellular membrane-bounded organelle;GO:0043231//intracellular membrane-bounded organelle;GO:0043231//intracellular membrane-bounded organelle;GO:0043231//intracellular membrane-bounded organelle;GO:0005634//nucleus;GO:0005634//nucleus;GO:0005739//mitochondrion	GO:0030246//carbohydrate binding;GO:0030246//carbohydrate binding;GO:0030246//carbohydrate binding;GO:0030246//carbohydrate binding;GO:0030246//carbohydrate binding;GO:0030246//carbohydrate binding;GO:0030246//carbohydrate binding;GO:0030246//carbohydrate binding	GO:0006486//protein glycosylation;GO:0006888//ER to Golgi vesicle-mediated transport;GO:0043090//amino acid import;GO:0006486//protein glycosylation;GO:0006888//ER to Golgi vesicle-mediated transport;GO:0043090//amino acid import;GO:0006486//protein glycosylation;GO:0006888//ER to Golgi vesicle-mediated transport;GO:0043090//amino acid import;GO:0006486//protein glycosylation;GO:0006888//ER to Go…	gi|359474026|ref|XP_002276624.2|/0.0/PREDICTED: uncharacterized protein LOC100259829 [Vitis vinifera]
VIT_207s0005g01320	722	47.3533	133.374	1.48188	-		-	-	-	gi|225437535|ref|XP_002275699.1|/5.30153E-69/PREDICTED: uncharacterized protein LOC100253802 [Vitis vinifera]
VIT_207s0005g06640	2534.5	68.3353	191.496	1.47825	-		GO:0005739//mitochondrion;GO:0005737//cytoplasm;GO:0005737//cytoplasm;GO:0005737//cytoplasm;GO:0005737//cytoplasm;GO:0005737//cytoplasm;GO:0005737//cytoplasm;GO:0005737//cytoplasm;GO:0005737//cytoplasm;GO:0005739//mitochondrion	GO:0004812//aminoacyl-tRNA ligase activity;GO:0005215//transporter activity;GO:0005524//ATP binding;GO:0004812//aminoacyl-tRNA ligase activity;GO:0005215//transporter activity;GO:0005524//ATP binding;GO:0004812//aminoacyl-tRNA ligase activity;GO:0005215//transporter activity;GO:0005524//ATP binding;GO:0004812//aminoacyl-tRNA ligase activity;GO:0005215//transporter activity;GO:0005524//ATP binding…	GO:0006418//tRNA aminoacylation for protein translation;GO:0006810//transport;GO:0006418//tRNA aminoacylation for protein translation;GO:0006810//transport;GO:0006418//tRNA aminoacylation for protein translation;GO:0006810//transport;GO:0006418//tRNA aminoacylation for protein translation;GO:0006810//transport;GO:0006418//tRNA aminoacylation for protein translation;GO:0006810//transport;GO:000641…	gi|297744366|emb|CBI37336.3|/0.0/unnamed protein product [Vitis vinifera]
VIT_214s0006g02520	4065	235.966	658.404	1.47797	-		GO:0030117//membrane coat;GO:0030117//membrane coat	GO:0003677//DNA binding;GO:0005515//protein binding;GO:0003677//DNA binding;GO:0005515//protein binding	GO:0006886//intracellular protein transport;GO:0016192//vesicle-mediated transport;GO:0006886//intracellular protein transport;GO:0016192//vesicle-mediated transport	gi|296087245|emb|CBI33619.3|/0.0/unnamed protein product [Vitis vinifera]
VIT_211s0016g05530	783	824.33	2274.37	1.46348	-		-	GO:0005507//copper ion binding;GO:0009055//electron carrier activity	-	gi|297738974|emb|CBI28219.3|/5.11086E-64/unnamed protein product [Vitis vinifera]
VIT_210s0116g01340	824	70.7719	195.071	1.45475	-		GO:0005634//nucleus	GO:0005507//copper ion binding	GO:0006825//copper ion transport	gi|359489123|ref|XP_003633880.1|/6.9314E-51/PREDICTED: uncharacterized protein LOC100854156 [Vitis vinifera]
VIT_205s0077g02320	807.26	73.0455	200.184	1.44674	-		GO:0016021//integral component of membrane;GO:0016021//integral component of membrane;GO:0016021//integral component of membrane;GO:0016021//integral component of membrane	-	GO:0009723//response to ethylene;GO:0001666//response to hypoxia;GO:0009723//response to ethylene;GO:0009723//response to ethylene;GO:0001666//response to hypoxia;GO:0009723//response to ethylene	gi|225431729|ref|XP_002268696.1|/2.1984E-23/PREDICTED: uncharacterized protein LOC100243044 [Vitis vinifera]
VIT_202s0025g01235	1252	36.801	101.234	1.4446	-		-	-	-	gi|224058340|ref|XP_002299484.1|/6.49302E-31/predicted protein [Populus trichocarpa]
VIT_207s0151g00370	1120	110.584	301.811	1.4434	-		GO:0005634//nucleus;GO:0005886//plasma membrane	GO:0003676//nucleic acid binding;GO:0008270//zinc ion binding;GO:0016301//kinase activity	GO:0015074//DNA integration;GO:0016310//phosphorylation;GO:0044763;GO:0050794//regulation of cellular process	gi|359479667|ref|XP_003632326.1|/3.99499E-62/PREDICTED: uncharacterized protein LOC100852899 [Vitis vinifera]
VIT_205s0049g00780	814	156.696	423.567	1.43104	-		-	-	-	gi|359477645|ref|XP_002285078.2|/5.78731E-31/PREDICTED: proline-rich 33 kDa extensin-related protein-like isoform 2 [Vitis vinifera]
VIT_210s0003g05380	4108	270.598	721.925	1.41364	-		GO:0005783//endoplasmic reticulum;GO:0016021//integral component of membrane;GO:0048046//apoplast;GO:0005783//endoplasmic reticulum;GO:0016021//integral component of membrane;GO:0048046//apoplast	GO:0005506//iron ion binding;GO:0009055//electron carrier activity;GO:0016705//oxidoreductase activity, acting on paired donors, with incorporation or reduction of molecular oxygen;GO:0020037//heme binding;GO:0030145//manganese ion binding;GO:0045735//nutrient reservoir activity;GO:0046424//ferulate 5-hydroxylase activity;GO:0080132//fatty acid alpha-hydroxylase activity;GO:0005506//iron ion bind…	GO:0000038//very long-chain fatty acid metabolic process;GO:0006633//fatty acid biosynthetic process;GO:0006891//intra-Golgi vesicle-mediated transport;GO:0009809//lignin biosynthetic process;GO:0010224//response to UV-B;GO:0043069//negative regulation of programmed cell death;GO:0055114//oxidation-reduction process;GO:0000038//very long-chain fatty acid metabolic process;GO:0006633//fatty acid b…	gi|297740876|emb|CBI31058.3|/1.27698E-137/unnamed protein product [Vitis vinifera]
VIT_218s0001g13920	1416	156.162	413.464	1.40117	-		GO:0005768//endosome;GO:0005794//Golgi apparatus;GO:0005802//trans-Golgi network	GO:0008168//methyltransferase activity	GO:0032259//methylation	gi|225458039|ref|XP_002277626.1|/0.0/PREDICTED: uncharacterized protein LOC100259190 [Vitis vinifera]
VIT_214s0108g01450	3277.93	96.5397	254.208	1.3911	-		GO:0005774//vacuolar membrane;GO:0005774//vacuolar membrane;GO:0005774//vacuolar membrane;GO:0005774//vacuolar membrane;GO:0005774//vacuolar membrane;GO:0005774//vacuolar membrane	GO:0005516//calmodulin binding;GO:0005516//calmodulin binding;GO:0005516//calmodulin binding;GO:0005516//calmodulin binding;GO:0005516//calmodulin binding;GO:0005516//calmodulin binding	-	gi|296082979|emb|CBI22280.3|/6.72524E-135/unnamed protein product [Vitis vinifera]
VIT_219s0015g01850	2774.89	291.284	762.195	1.38584	-		GO:0005794//Golgi apparatus;GO:0009507//chloroplast;GO:0016021//integral component of membrane;GO:0005794//Golgi apparatus;GO:0009507//chloroplast;GO:0016021//integral component of membrane;GO:0005794//Golgi apparatus;GO:0009507//chloroplast;GO:0016021//integral component of membrane	GO:0005247//voltage-gated chloride channel activity;GO:0005515//protein binding;GO:0005247//voltage-gated chloride channel activity;GO:0005515//protein binding;GO:0005247//voltage-gated chloride channel activity;GO:0005515//protein binding	GO:0006821//chloride transport;GO:0055085//transmembrane transport;GO:0006821//chloride transport;GO:0055085//transmembrane transport;GO:0006821//chloride transport;GO:0055085//transmembrane transport	gi|225463532|ref|XP_002265413.1|/0.0/PREDICTED: chloride channel protein CLC-f [Vitis vinifera]
VIT_219s0014g05430	903	153.818	402.488	1.38414	-		GO:0046658//anchored component of plasma membrane	GO:0005515//protein binding	GO:0009626//plant-type hypersensitive response;GO:0009816//defense response to bacterium, incompatible interaction;GO:0009817//defense response to fungus, incompatible interaction;GO:0010942//positive regulation of cell death	gi|225461096|ref|XP_002282205.1|/1.68457E-108/PREDICTED: protein NDR1 [Vitis vinifera]
VIT_214s0108g00060	2239	178.843	458.984	1.3567	-		GO:0005739//mitochondrion;GO:0005783//endoplasmic reticulum;GO:0016023//cytoplasmic, membrane-bounded vesicle	-	-	gi|225452708|ref|XP_002277137.1|/0.0/PREDICTED: uncharacterized protein LOC100249048 [Vitis vinifera]
VIT_218s0001g08060	2664	96.9402	247.292	1.34547	-		GO:0044464	GO:0046983//protein dimerization activity	-	gi|225458998|ref|XP_002285594.1|/4.21984E-51/PREDICTED: uncharacterized protein At5g65660-like [Vitis vinifera]
VIT_210s0003g00270	3773	205.36	520.439	1.33895	-		GO:0005667//transcription factor complex	GO:0003700//transcription factor activity, sequence-specific DNA binding;GO:0043565//sequence-specific DNA binding	GO:0006355//regulation of transcription, DNA-templated	gi|359483496|ref|XP_002273559.2|/0.0/PREDICTED: uncharacterized protein LOC100247033 [Vitis vinifera]
VIT_200s0434g00060	2737	79.048	199.702	1.33025	-		GO:0005741//mitochondrial outer membrane;GO:0009507//chloroplast;GO:0016021//integral component of membrane	GO:0008308//voltage-gated anion channel activity	GO:0006623//protein targeting to vacuole;GO:0044070//regulation of anion transport;GO:0055085//transmembrane transport	gi|359496807|ref|XP_003635342.1|/0.0/PREDICTED: transmembrane protein 63A-like [Vitis vinifera]
VIT_201s0011g05250	750	202.674	510.309	1.32956	-		-	-	-	gi|225424289|ref|XP_002284639.1|/2.84174E-75/PREDICTED: uncharacterized protein LOC100247453 [Vitis vinifera]
VIT_208s0007g06770	4500.04	374.313	926.449	1.30605	-		GO:0009506//plasmodesma;GO:0009506//plasmodesma;GO:0009506//plasmodesma;GO:0009506//plasmodesma;GO:0009506//plasmodesma	-	-	gi|359481863|ref|XP_003632681.1|/0.0/PREDICTED: uncharacterized protein LOC100257222 [Vitis vinifera]
VIT_200s0992g00010	2353	91.3942	224.459	1.29051	-		GO:0005634//nucleus	GO:0008270//zinc ion binding	-	gi|225444440|ref|XP_002266891.1|/0.0/PREDICTED: uncharacterized protein LOC100252085 [Vitis vinifera]
VIT_212s0059g01300	3302.29	162.763	397.382	1.28452	-		-	-	-	gi|359485518|ref|XP_002271198.2|/0.0/PREDICTED: uncharacterized protein LOC100251719 [Vitis vinifera]
VIT_205s0077g01870	3809	479.629	1169	1.28419	K506;K17766;K09571		GO:0005886//plasma membrane	GO:0005515//protein binding	-	gi|147819173|emb|CAN69220.1|/0.0/hypothetical protein VITISV_012016 [Vitis vinifera]
VIT_214s0060g01470	3333.28	126.577	309.036	1.28361	-		GO:0005634//nucleus;GO:0005634//nucleus;GO:0005634//nucleus	GO:0005516//calmodulin binding;GO:0005516//calmodulin binding;GO:0005516//calmodulin binding;GO:0005516//calmodulin binding;GO:0005516//calmodulin binding;GO:0005516//calmodulin binding	GO:0006487//protein N-linked glycosylation;GO:0006487//protein N-linked glycosylation;GO:0006487//protein N-linked glycosylation;GO:0006487//protein N-linked glycosylation;GO:0006487//protein N-linked glycosylation;GO:0006487//protein N-linked glycosylation	gi|147856442|emb|CAN82842.1|/5.57527E-162/hypothetical protein VITISV_019567 [Vitis vinifera]
VIT_205s0020g02810	1915.2	67.6451	165.349	1.28171	-		GO:0005634//nucleus;GO:0005634//nucleus;GO:0005634//nucleus;GO:0005634//nucleus	-	GO:0007623//circadian rhythm;GO:0007623//circadian rhythm;GO:0007623//circadian rhythm;GO:0007623//circadian rhythm	gi|225432554|ref|XP_002280710.1|/0.0/PREDICTED: uncharacterized protein LOC100261302 [Vitis vinifera]
VIT_201s0026g00810	2324	44.4065	108.626	1.27875	-		GO:0005634//nucleus	-	GO:0010167//response to nitrate;GO:0010411//xyloglucan metabolic process;GO:0015706//nitrate transport	gi|225424775|ref|XP_002266929.1|/0.0/PREDICTED: uncharacterized protein LOC100241586 [Vitis vinifera]
VIT_207s0005g01240	3477	155.953	378.237	1.27482	-		-	GO:0004806//triglyceride lipase activity;GO:0004806//triglyceride lipase activity	GO:0016042//lipid catabolic process;GO:0046486//glycerolipid metabolic process;GO:0016042//lipid catabolic process;GO:0031668//cellular response to extracellular stimulus;GO:0033554//cellular response to stress;GO:0046486//glycerolipid metabolic process	gi|225437523|ref|XP_002270132.1|/0.0/PREDICTED: uncharacterized protein LOC100267577 [Vitis vinifera]
VIT_219s0014g05200	4063.83	394.228	926.553	1.23155	-		-	-	-	gi|359493954|ref|XP_003634700.1|/0.0/PREDICTED: uncharacterized protein LOC100241773 isoform 2 [Vitis vinifera]
VIT_210s0003g02620	1151	127.203	299.276	1.23032	-		GO:0009507//chloroplast;GO:0016020//membrane	-	-	gi|225463366|ref|XP_002272619.1|/1.26763E-69/PREDICTED: uncharacterized protein LOC100253821 [Vitis vinifera]
VIT_213s0064g00460	1783.16	13861.5	32479.9	1.22842	-		GO:0005886//plasma membrane;GO:0009505//plant-type cell wall;GO:0009507//chloroplast;GO:0005886//plasma membrane;GO:0009505//plant-type cell wall;GO:0009507//chloroplast	-	GO:0009740//gibberellic acid mediated signaling pathway;GO:0010162//seed dormancy process;GO:0015995//chlorophyll biosynthetic process;GO:0009740//gibberellic acid mediated signaling pathway;GO:0010162//seed dormancy process;GO:0015995//chlorophyll biosynthetic process	gi|225450055|ref|XP_002276894.1|/0.0/PREDICTED: uncharacterized protein LOC100258445 [Vitis vinifera]
VIT_214s0066g02190	2298.56	158.507	369.423	1.21752	-		GO:0005886//plasma membrane;GO:0005886//plasma membrane;GO:0043231//intracellular membrane-bounded organelle;GO:0005886//plasma membrane;GO:0005886//plasma membrane;GO:0005886//plasma membrane;GO:0043231//intracellular membrane-bounded organelle	-	-	gi|225452618|ref|XP_002276119.1|/0.0/PREDICTED: uncharacterized protein LOC100266380 [Vitis vinifera]
VIT_209s0002g04590	3153	477.21	1101.5	1.20571	-		GO:0005634//nucleus;GO:0005886//plasma membrane	-	GO:0000085;GO:0006306//DNA methylation;GO:0006346//methylation-dependent chromatin silencing;GO:0006487//protein N-linked glycosylation;GO:0006499//N-terminal protein myristoylation;GO:0008356//asymmetric cell division;GO:0009640//photomorphogenesis;GO:0009909//regulation of flower development;GO:0010388//cullin deneddylation;GO:0016567//protein ubiquitination;GO:0016579//protein deubiquitination…	gi|225442649|ref|XP_002279674.1|/0.0/PREDICTED: uncharacterized protein LOC100241173 [Vitis vinifera]
VIT_218s0072g00860	1710	79.9023	34.0748	-1.21469	-		GO:0009535//chloroplast thylakoid membrane;GO:0009535//chloroplast thylakoid membrane	-	-	gi|225445631|ref|XP_002263171.1|/9.50161E-70/PREDICTED: uncharacterized protein LOC100246766 [Vitis vinifera]
VIT_219s0085g01000	1425	234.579	100.576	-1.21673	-		GO:0009507//chloroplast;GO:0009507//chloroplast;GO:0009507//chloroplast	GO:0003723//RNA binding;GO:0004521//endoribonuclease activity;GO:2001070//starch binding;GO:0003723//RNA binding;GO:0004521//endoribonuclease activity;GO:2001070//starch binding;GO:0003723//RNA binding;GO:0004521//endoribonuclease activity;GO:2001070//starch binding	GO:0009902//chloroplast relocation;GO:0010027//thylakoid membrane organization;GO:0010239//chloroplast mRNA processing;GO:0016556//mRNA modification;GO:0042793//transcription from plastid promoter;GO:0051252//regulation of RNA metabolic process;GO:1901259//chloroplast rRNA processing;GO:0009902//chloroplast relocation;GO:0010027//thylakoid membrane organization;GO:0010239//chloroplast mRNA proces…	gi|225447486|ref|XP_002267175.1|/0.0/PREDICTED: uncharacterized protein LOC100256290 [Vitis vinifera]
VIT_218s0001g14070	2393.5	96.2667	40.9717	-1.22002	-		GO:0005576//extracellular region;GO:0016020//membrane;GO:0005576//extracellular region;GO:0016020//membrane	-	-	gi|225438680|ref|XP_002277444.1|/0.0/PREDICTED: uncharacterized membrane protein At3g27390 [Vitis vinifera]
VIT_200s0294g00040	1703.29	200.187	85.5581	-1.22042	-		GO:0009507//chloroplast;GO:0016020//membrane;GO:0009507//chloroplast;GO:0016020//membrane;GO:0009507//chloroplast;GO:0016020//membrane	GO:0015238//drug transmembrane transporter activity;GO:0015297//antiporter activity;GO:0015238//drug transmembrane transporter activity;GO:0015297//antiporter activity;GO:0015238//drug transmembrane transporter activity;GO:0015297//antiporter activity	GO:0006855//drug transmembrane transport;GO:0016998//cell wall macromolecule catabolic process;GO:0006855//drug transmembrane transport;GO:0016998//cell wall macromolecule catabolic process;GO:0006855//drug transmembrane transport;GO:0016998//cell wall macromolecule catabolic process	gi|297744535|emb|CBI37797.3|/0.0/unnamed protein product [Vitis vinifera]
VIT_200s1003g00010	1185	239.493	102.13	-1.22458	-		-	-	-	gi|359497432|ref|XP_003635513.1|/2.5121E-83/PREDICTED: uncharacterized protein LOC100261790 [Vitis vinifera]
VIT_206s0080g01270	1714	259.268	109.985	-1.23248	-		GO:0005634//nucleus;GO:0005886//plasma membrane;GO:0005634//nucleus;GO:0005886//plasma membrane;GO:0005634//nucleus;GO:0005886//plasma membrane	GO:0005198//structural molecule activity;GO:0005198//structural molecule activity;GO:0005198//structural molecule activity	GO:0006499//N-terminal protein myristoylation;GO:0006623//protein targeting to vacuole;GO:0006970//response to osmotic stress;GO:0009739//response to gibberellin;GO:0032880//regulation of protein localization;GO:0006499//N-terminal protein myristoylation;GO:0006623//protein targeting to vacuole;GO:0006970//response to osmotic stress;GO:0009739//response to gibberellin;GO:0032880//regulation of pr…	gi|225461302|ref|XP_002284424.1|/3.24316E-97/PREDICTED: vesicle-associated protein 4-1 [Vitis vinifera]
VIT_213s0067g00730	1600.31	102.474	43.216	-1.23378	-		GO:0009535//chloroplast thylakoid membrane;GO:0010287//plastoglobule;GO:0009535//chloroplast thylakoid membrane;GO:0010287//plastoglobule;GO:0009535//chloroplast thylakoid membrane;GO:0010287//plastoglobule;GO:0009535//chloroplast thylakoid membrane;GO:0010287//plastoglobule	-	-	gi|225440878|ref|XP_002282544.1|/8.6169E-115/PREDICTED: heme-binding-like protein At3g10130, chloroplastic-like [Vitis vinifera]
VIT_206s0004g07090	1107	120.19	50.5244	-1.2401	-		-	GO:0046872//metal ion binding	GO:0030001//metal ion transport	gi|225470181|ref|XP_002268244.1|/2.07727E-22/PREDICTED: uncharacterized protein LOC100250657 [Vitis vinifera]
VIT_203s0017g00540	1031.56	135.522	56.8251	-1.24487	-		GO:0005634//nucleus;GO:0005774//vacuolar membrane;GO:0005886//plasma membrane;GO:0009536//plastid;GO:0005634//nucleus;GO:0005774//vacuolar membrane;GO:0005886//plasma membrane;GO:0009536//plastid	-	-	gi|225465783|ref|XP_002268351.1|/8.20544E-87/PREDICTED: uncharacterized protein LOC100267500 [Vitis vinifera]
VIT_207s0151g00520	3027	278.365	116.759	-1.24902	-		-	-	GO:0006950//response to stress	gi|225424007|ref|XP_002283457.1|/3.57128E-96/PREDICTED: universal stress protein YxiE-like [Vitis vinifera]
VIT_216s0050g00930	1717	819.772	344.222	-1.25038	-		-	-	-	gi|359472612|ref|XP_002280971.2|/1.32989E-24/PREDICTED: uncharacterized protein LOC100268019 [Vitis vinifera]
VIT_204s0023g03290	660	41.1867	16.924	-1.25279	-		GO:0005739//mitochondrion;GO:0009535//chloroplast thylakoid membrane	-	GO:0016556//mRNA modification	gi|224133726|ref|XP_002327665.1|/7.48996E-38/predicted protein [Populus trichocarpa]
VIT_215s0021g00050	2100	46.4284	19.1193	-1.25311	-		GO:0005634//nucleus;GO:0005829//cytosol;GO:0005886//plasma membrane;GO:0009507//chloroplast	GO:0005515//protein binding	-	gi|296082554|emb|CBI21559.3|/0.0/unnamed protein product [Vitis vinifera]
VIT_203s0017g02110	1585	51.2432	21.0541	-1.25877	-		-	-	-	gi|147855251|emb|CAN79598.1|/1.0812E-144/hypothetical protein VITISV_020993 [Vitis vinifera]
VIT_218s0001g11360	4036.91	66.7515	27.3213	-1.26976	-		GO:0005576//extracellular region;GO:0005886//plasma membrane;GO:0016023//cytoplasmic, membrane-bounded vesicle	-	-	gi|297737727|emb|CBI26928.3|/0.0/unnamed protein product [Vitis vinifera]
VIT_214s0108g01070	2060.96	132.198	54.1889	-1.27698	-		GO:0000785//chromatin;GO:0005634//nucleus;GO:0009536//plastid;GO:0000785//chromatin;GO:0005634//nucleus;GO:0009536//plastid;GO:0000785//chromatin;GO:0005634//nucleus;GO:0009536//plastid;GO:0000785//chromatin;GO:0005634//nucleus;GO:0009536//plastid;GO:0000785//chromatin;GO:0005634//nucleus;GO:0009536//plastid;GO:0000785//chromatin;GO:0005634//nucleus;GO:0009536//plastid;GO:0000785//chromatin;GO:00…	GO:0003677//DNA binding;GO:0003682//chromatin binding;GO:0005515//protein binding;GO:0003677//DNA binding;GO:0003682//chromatin binding;GO:0005515//protein binding;GO:0003677//DNA binding;GO:0003682//chromatin binding;GO:0005515//protein binding;GO:0003677//DNA binding;GO:0003682//chromatin binding;GO:0005515//protein binding;GO:0003677//DNA binding;GO:0003682//chromatin binding;GO:0005515//prote…	GO:0009630//gravitropism;GO:0010413//glucuronoxylan metabolic process;GO:0045492//xylan biosynthetic process;GO:0009630//gravitropism;GO:0010413//glucuronoxylan metabolic process;GO:0045492//xylan biosynthetic process;GO:0009630//gravitropism;GO:0010413//glucuronoxylan metabolic process;GO:0045492//xylan biosynthetic process;GO:0009630//gravitropism;GO:0010413//glucuronoxylan metabolic process;GO…	gi|297736887|emb|CBI26088.3|/0.0/unnamed protein product [Vitis vinifera]
VIT_213s0019g00350	1658	307.973	126.456	-1.28002	-		-	-	-	gi|359484691|ref|XP_003633146.1|/5.95981E-94/PREDICTED: uncharacterized protein LOC100852953 [Vitis vinifera]
VIT_202s0154g00390	939	311.152	127.547	-1.28247	-		GO:0005634//nucleus;GO:0005783//endoplasmic reticulum;GO:0005634//nucleus;GO:0005783//endoplasmic reticulum;GO:0005634//nucleus;GO:0005783//endoplasmic reticulum;GO:0005634//nucleus;GO:0005783//endoplasmic reticulum;GO:0005634//nucleus;GO:0005783//endoplasmic reticulum	-	GO:0000902//cell morphogenesis;GO:0006487//protein N-linked glycosylation;GO:0016049//cell growth;GO:0048193//Golgi vesicle transport;GO:0000902//cell morphogenesis;GO:0006487//protein N-linked glycosylation;GO:0016049//cell growth;GO:0048193//Golgi vesicle transport;GO:0000902//cell morphogenesis;GO:0006487//protein N-linked glycosylation;GO:0016049//cell growth;GO:0048193//Golgi vesicle transpo…	gi|225427520|ref|XP_002264767.1|/0.0/PREDICTED: uncharacterized protein At2g24330 [Vitis vinifera]
VIT_204s0023g03510	1989.91	1193.72	489.982	-1.28359	-		GO:0005634//nucleus	GO:0005516//calmodulin binding	GO:0009414//response to water deprivation;GO:0009651//response to salt stress;GO:0010337//regulation of salicylic acid metabolic process	gi|225440213|ref|XP_002283659.1|/3.15539E-125/PREDICTED: uncharacterized protein LOC100255095 [Vitis vinifera]
VIT_202s0025g04890	856	61.9046	25.0548	-1.28409	-		GO:0005739//mitochondrion;GO:0005739//mitochondrion	GO:0004519//endonuclease activity;GO:0004527//exonuclease activity;GO:0004519//endonuclease activity;GO:0004527//exonuclease activity	-	gi|225432458|ref|XP_002277228.1|/0.0/PREDICTED: uncharacterized protein LOC100259606 [Vitis vinifera]
VIT_203s0063g01970	1476.86	112.538	45.7068	-1.28844	-		GO:0005618//cell wall;GO:0005737//cytoplasm;GO:0005886//plasma membrane;GO:0016363//nuclear matrix;GO:0005618//cell wall;GO:0005737//cytoplasm;GO:0005886//plasma membrane;GO:0016363//nuclear matrix;GO:0005618//cell wall;GO:0005737//cytoplasm;GO:0005886//plasma membrane;GO:0016363//nuclear matrix;GO:0005618//cell wall;GO:0005737//cytoplasm;GO:0005886//plasma membrane;GO:0016363//nuclear matrix	GO:0005344//oxygen transporter activity;GO:0005506//iron ion binding;GO:0019825//oxygen binding;GO:0020037//heme binding;GO:0005344//oxygen transporter activity;GO:0005506//iron ion binding;GO:0019825//oxygen binding;GO:0020037//heme binding;GO:0005344//oxygen transporter activity;GO:0005506//iron ion binding;GO:0019825//oxygen binding;GO:0020037//heme binding;GO:0005344//oxygen transporter activ…	GO:0006950//response to stress;GO:0009399//nitrogen fixation;GO:0015671//oxygen transport;GO:0006950//response to stress;GO:0009399//nitrogen fixation;GO:0015671//oxygen transport;GO:0006950//response to stress;GO:0009399//nitrogen fixation;GO:0015671//oxygen transport;GO:0006950//response to stress;GO:0009399//nitrogen fixation;GO:0015671//oxygen transport	gi|297741407|emb|CBI32538.3|/2.81435E-130/unnamed protein product [Vitis vinifera]
VIT_218s0001g01770	1590	179.638	73.1519	-1.28893	-		GO:0005739//mitochondrion	-	-	gi|225439372|ref|XP_002270072.1|/0.0/PREDICTED: uncharacterized protein LOC100254761 isoform 1 [Vitis vinifera]
VIT_212s0059g01820	2368.34	207.726	84.5992	-1.28974	-		GO:0005886//plasma membrane	-	-	gi|225453252|ref|XP_002266696.1|/8.08788E-138/PREDICTED: uncharacterized protein LOC100244411 [Vitis vinifera]
VIT_204s0008g01900	1011	39.8293	15.9153	-1.29061	-		GO:0009535//chloroplast thylakoid membrane	-	-	gi|225429678|ref|XP_002281444.1|/1.83952E-126/PREDICTED: uncharacterized protein LOC100249293 [Vitis vinifera]
VIT_215s0046g02170	1777	277.459	113.011	-1.29115	-		GO:0005667//transcription factor complex;GO:0005829//cytosol;GO:0005667//transcription factor complex;GO:0005829//cytosol;GO:0005667//transcription factor complex;GO:0005829//cytosol;GO:0005667//transcription factor complex;GO:0005829//cytosol;GO:0005667//transcription factor complex;GO:0005829//cytosol;GO:0005667//transcription factor complex;GO:0005829//cytosol	GO:0003700//transcription factor activity, sequence-specific DNA binding;GO:0043565//sequence-specific DNA binding;GO:0046983//protein dimerization activity;GO:0003700//transcription factor activity, sequence-specific DNA binding;GO:0043565//sequence-specific DNA binding;GO:0046983//protein dimerization activity;GO:0003700//transcription factor activity, sequence-specific DNA binding;GO:0043565//…	GO:0006355//regulation of transcription, DNA-templated;GO:0009410//response to xenobiotic stimulus;GO:0030968//endoplasmic reticulum unfolded protein response;GO:0006355//regulation of transcription, DNA-templated;GO:0042221//response to chemical;GO:0006355//regulation of transcription, DNA-templated;GO:0009410//response to xenobiotic stimulus;GO:0030968//endoplasmic reticulum unfolded protein re…	gi|225427794|ref|XP_002269363.1|/0.0/PREDICTED: uncharacterized protein LOC100255631 [Vitis vinifera]
VIT_208s0040g00850	2727	49.2791	19.7448	-1.29297	-		GO:0009543//chloroplast thylakoid lumen;GO:0009570//chloroplast stroma;GO:0009654//photosystem II oxygen evolving complex;GO:0019898//extrinsic component of membrane	GO:0005509//calcium ion binding;GO:0005515//protein binding	GO:0009965//leaf morphogenesis;GO:0010027//thylakoid membrane organization;GO:0015979//photosynthesis;GO:0030154//cell differentiation	gi|225440155|ref|XP_002283307.1|/5.02081E-145/PREDICTED: psbP domain-containing protein 6, chloroplastic [Vitis vinifera]
VIT_216s0050g01440	2048	91.4941	36.545	-1.30949	-		-	GO:0010181//FMN binding;GO:0016491//oxidoreductase activity	GO:0009987//cellular process;GO:0055114//oxidation-reduction process	gi|359490595|ref|XP_002274287.2|/0.0/PREDICTED: uncharacterized protein At3g49140 [Vitis vinifera]
VIT_203s0167g00220	566	40.211	15.797	-1.31452	-		GO:0005829//cytosol;GO:0009507//chloroplast;GO:0042406//extrinsic component of endoplasmic reticulum membrane;GO:0005829//cytosol;GO:0009507//chloroplast;GO:0042406//extrinsic component of endoplasmic reticulum membrane;GO:0005829//cytosol;GO:0009507//chloroplast;GO:0042406//extrinsic component of endoplasmic reticulum membrane;GO:0005829//cytosol;GO:0009507//chloroplast;GO:0042406//extrinsic com…	-	GO:0006623//protein targeting to vacuole;GO:0006888//ER to Golgi vesicle-mediated transport;GO:0006623//protein targeting to vacuole;GO:0006888//ER to Golgi vesicle-mediated transport;GO:0006623//protein targeting to vacuole;GO:0006888//ER to Golgi vesicle-mediated transport;GO:0006623//protein targeting to vacuole;GO:0006888//ER to Golgi vesicle-mediated transport	gi|225456727|ref|XP_002268222.1|/0.0/PREDICTED: RINT1-like protein-like [Vitis vinifera]
VIT_212s0028g00270	1806	166.104	66.3984	-1.31484	-		GO:0005739//mitochondrion;GO:0005794//Golgi apparatus;GO:0016021//integral component of membrane	-	-	gi|225441508|ref|XP_002280441.1|/6.54768E-90/PREDICTED: transmembrane and coiled-coil domains protein 1 [Vitis vinifera]
VIT_211s0118g00360	1448.24	97.2007	38.5624	-1.31995	-		-	-	-	gi|147845807|emb|CAN80099.1|/0.0/hypothetical protein VITISV_002699 [Vitis vinifera]
VIT_217s0000g01410	1815	58.2728	22.9645	-1.32028	-		GO:0005576//extracellular region;GO:0005618//cell wall;GO:0008287//protein serine/threonine phosphatase complex	GO:0003993//acid phosphatase activity;GO:0004722//protein serine/threonine phosphatase activity;GO:0046872//metal ion binding	GO:0006470//protein dephosphorylation;GO:0006771//riboflavin metabolic process;GO:0019497	gi|359491079|ref|XP_003634216.1|/0.0/PREDICTED: probable inactive purple acid phosphatase 27-like [Vitis vinifera]
VIT_215s0048g02180	2576.8	38.9824	15.1943	-1.32439	-		GO:0005739//mitochondrion;GO:0005768//endosome;GO:0005794//Golgi apparatus;GO:0005802//trans-Golgi network;GO:0016021//integral component of membrane;GO:0005739//mitochondrion;GO:0005768//endosome;GO:0005794//Golgi apparatus;GO:0005802//trans-Golgi network;GO:0016021//integral component of membrane;GO:0005739//mitochondrion;GO:0005768//endosome;GO:0005794//Golgi apparatus;GO:0005802//trans-Golgi …	GO:0016757//transferase activity, transferring glycosyl groups;GO:0016757//transferase activity, transferring glycosyl groups;GO:0016757//transferase activity, transferring glycosyl groups;GO:0016757//transferase activity, transferring glycosyl groups;GO:0016757//transferase activity, transferring glycosyl groups	GO:0006672//ceramide metabolic process;GO:0006672//ceramide metabolic process;GO:0006672//ceramide metabolic process;GO:0006672//ceramide metabolic process;GO:0006672//ceramide metabolic process	gi|297744567|emb|CBI37829.3|/0.0/unnamed protein product [Vitis vinifera]
VIT_214s0108g00450	1520.27	55.9213	21.9272	-1.32639	-		GO:0005634//nucleus	-	-	gi|297740874|emb|CBI31056.3|/2.1141E-163/unnamed protein product [Vitis vinifera]
VIT_206s0004g06220	3482.55	83.3422	32.8599	-1.32647	-		GO:0005783//endoplasmic reticulum;GO:0016023//cytoplasmic, membrane-bounded vesicle;GO:0005783//endoplasmic reticulum;GO:0016023//cytoplasmic, membrane-bounded vesicle;GO:0005783//endoplasmic reticulum;GO:0016023//cytoplasmic, membrane-bounded vesicle	-	-	gi|225433007|ref|XP_002284580.1|/1.1452E-69/PREDICTED: uncharacterized protein LOC100245894 [Vitis vinifera]
VIT_214s0060g02270	1104	285.251	113.361	-1.32657	-		GO:0005768//endosome;GO:0005794//Golgi apparatus;GO:0005802//trans-Golgi network;GO:0005886//plasma membrane;GO:0009543//chloroplast thylakoid lumen	GO:0016757//transferase activity, transferring glycosyl groups	GO:0006084//acetyl-CoA metabolic process;GO:0009663//plasmodesma organization;GO:0009737//response to abscisic acid;GO:0009744//response to sucrose;GO:0009749//response to glucose;GO:0009750//response to fructose;GO:0009826//unidimensional cell growth;GO:0009831//plant-type cell wall modification involved in multidimensional cell growth;GO:0016126//sterol biosynthetic process;GO:0016132//brassino…	gi|225449919|ref|XP_002268366.1|/0.0/PREDICTED: uncharacterized protein LOC100261913 [Vitis vinifera]
VIT_218s0001g15660	1842	251.21	99.5254	-1.33036	-		-	-	-	gi|225457747|ref|XP_002262980.1|/2.61708E-137/PREDICTED: pathogen-related protein [Vitis vinifera]
VIT_204s0023g02440	2624.14	46.1407	17.9739	-1.3305	-		GO:0005794//Golgi apparatus;GO:0016021//integral component of membrane;GO:0016023//cytoplasmic, membrane-bounded vesicle;GO:0005794//Golgi apparatus;GO:0016021//integral component of membrane;GO:0016023//cytoplasmic, membrane-bounded vesicle;GO:0005794//Golgi apparatus;GO:0016021//integral component of membrane;GO:0016023//cytoplasmic, membrane-bounded vesicle	GO:0003676//nucleic acid binding;GO:0008270//zinc ion binding;GO:0003676//nucleic acid binding;GO:0008270//zinc ion binding;GO:0003676//nucleic acid binding;GO:0008270//zinc ion binding	GO:0007020//microtubule nucleation;GO:0007020//microtubule nucleation;GO:0007020//microtubule nucleation	gi|225442067|ref|XP_002271404.1|/0.0/PREDICTED: transmembrane protein 87A [Vitis vinifera]
VIT_200s0333g00040	1640	356.903	141.136	-1.33464	-		-	-	-	gi|225470242|ref|XP_002263284.1|/1.57869E-58/PREDICTED: uncharacterized protein At5g48480 [Vitis vinifera]
VIT_207s0129g00250	3693.73	43.3911	16.8208	-1.33543	-		GO:0005739//mitochondrion;GO:0005886//plasma membrane	-	-	gi|225425326|ref|XP_002273831.1|/8.21003E-118/PREDICTED: TVP38/TMEM64 family membrane protein slr0305 isoform 1 [Vitis vinifera]
VIT_202s0025g02450	1643	140.923	55.2192	-1.3419	-		GO:0005634//nucleus;GO:0005634//nucleus	GO:0005515//protein binding;GO:0030246//carbohydrate binding;GO:0005515//protein binding;GO:0030246//carbohydrate binding	GO:0009611//response to wounding;GO:0009611//response to wounding	gi|225426781|ref|XP_002282844.1|/1.09792E-166/PREDICTED: F-box protein PP2-A12 [Vitis vinifera]
VIT_212s0035g01350	1602	230.403	90.0965	-1.34861	-		GO:0005876//spindle microtubule;GO:0045298//tubulin complex	GO:0051011//microtubule minus-end binding	-	gi|225451827|ref|XP_002278111.1|/0.0/PREDICTED: uncharacterized protein LOC100242960 [Vitis vinifera]
VIT_202s0025g01470	878	160.234	62.508	-1.34941	-		-	-	-	gi|297738027|emb|CBI27228.3|/2.55133E-16/unnamed protein product [Vitis vinifera]
VIT_210s0116g00430	1083	92.3511	35.8653	-1.34948	-		GO:0005768//endosome;GO:0005794//Golgi apparatus;GO:0005802//trans-Golgi network;GO:0016020//membrane;GO:0016023//cytoplasmic, membrane-bounded vesicle	GO:0003924//GTPase activity;GO:0005525//GTP binding	GO:0006955//immune response	gi|225437197|ref|XP_002275124.1|/0.0/PREDICTED: guanylate-binding protein 4-like [Vitis vinifera]
VIT_207s0104g00200	1457.1	332.151	129.791	-1.35146	-		GO:0005829//cytosol;GO:0005829//cytosol;GO:0005829//cytosol;GO:0005634//nucleus;GO:0005829//cytosol	GO:0016853//isomerase activity;GO:0016853//isomerase activity;GO:0016853//isomerase activity;GO:0016853//isomerase activity;GO:0016853//isomerase activity;GO:0016853//isomerase activity;GO:0016853//isomerase activity	GO:0009058//biosynthetic process;GO:0009058//biosynthetic process;GO:0009058//biosynthetic process;GO:0009058//biosynthetic process;GO:0009058//biosynthetic process;GO:0009058//biosynthetic process;GO:0009058//biosynthetic process	gi|296086726|emb|CBI32361.3|/2.08248E-127/unnamed protein product [Vitis vinifera]
VIT_218s0075g00270	771	117.881	45.7274	-1.35435	-		-	-	-	gi|388503962|gb|AFK40047.1|/3.83321E-21/unknown [Lotus japonicus]
VIT_219s0027g00010	4434.82	38.327	14.5972	-1.35585	-		GO:0005634//nucleus	-	GO:0010089//xylem development;GO:0044036//cell wall macromolecule metabolic process	gi|147792827|emb|CAN62228.1|/0.0/hypothetical protein VITISV_008028 [Vitis vinifera]
VIT_218s0076g00210	2481.68	49.7199	19.0239	-1.35766	-		-	GO:0003723//RNA binding;GO:0003964//RNA-directed DNA polymerase activity;GO:0003723//RNA binding;GO:0003964//RNA-directed DNA polymerase activity;GO:0003723//RNA binding;GO:0003964//RNA-directed DNA polymerase activity	GO:0006278//RNA-dependent DNA replication;GO:0006278//RNA-dependent DNA replication;GO:0006278//RNA-dependent DNA replication	gi|297736269|emb|CBI24907.3|/0.0/unnamed protein product [Vitis vinifera]
VIT_218s0041g02170	1993.74	144.235	55.837	-1.3594	-		-	-	GO:0016998//cell wall macromolecule catabolic process;GO:0016998//cell wall macromolecule catabolic process;GO:0016998//cell wall macromolecule catabolic process;GO:0016998//cell wall macromolecule catabolic process;GO:0016998//cell wall macromolecule catabolic process;GO:0016998//cell wall macromolecule catabolic process;GO:0016998//cell wall macromolecule catabolic process	gi|296089404|emb|CBI39223.3|/1.27752E-82/unnamed protein product [Vitis vinifera]
VIT_208s0058g00640	1936.99	366.648	142.261	-1.36202	-		GO:0005886//plasma membrane;GO:0009536//plastid;GO:0016021//integral component of membrane;GO:0005886//plasma membrane;GO:0009536//plastid;GO:0016021//integral component of membrane	GO:0005215//transporter activity;GO:0005215//transporter activity	GO:0006810//transport;GO:0006810//transport	gi|225439560|ref|XP_002264479.1|/0.0/PREDICTED: patellin-6 [Vitis vinifera]
VIT_200s2188g00010	1764	229.673	88.9491	-1.36241	-		GO:0009507//chloroplast;GO:0009507//chloroplast	GO:0004672//protein kinase activity;GO:0005198//structural molecule activity;GO:0005524//ATP binding;GO:0004672//protein kinase activity;GO:0005198//structural molecule activity;GO:0005524//ATP binding	GO:0006468//protein phosphorylation;GO:0006468//protein phosphorylation	gi|302144036|emb|CBI23141.3|/0.0/unnamed protein product [Vitis vinifera]
VIT_219s0090g01870	5102.76	327.699	126.942	-1.36391	-		GO:0005618//cell wall;GO:0005634//nucleus;GO:0005768//endosome;GO:0005794//Golgi apparatus;GO:0005802//trans-Golgi network;GO:0009507//chloroplast	GO:0016757//transferase activity, transferring glycosyl groups	-	gi|225450038|ref|XP_002273124.1|/0.0/PREDICTED: uncharacterized protein LOC100256796 [Vitis vinifera]
VIT_217s0000g04160	3021	273.712	105.25	-1.37364	-		GO:0005739//mitochondrion;GO:0009506//plasmodesma;GO:0016023//cytoplasmic, membrane-bounded vesicle;GO:0046658//anchored component of plasma membrane;GO:0005739//mitochondrion;GO:0009506//plasmodesma;GO:0016023//cytoplasmic, membrane-bounded vesicle;GO:0046658//anchored component of plasma membrane;GO:0005739//mitochondrion;GO:0009506//plasmodesma;GO:0016023//cytoplasmic, membrane-bounded vesicle…	-	-	gi|302144145|emb|CBI23250.3|/0.0/unnamed protein product [Vitis vinifera]
VIT_214s0068g00330	2831	100.884	38.254	-1.38468	-		-	-	-	gi|225451731|ref|XP_002277074.1|/1.79061E-176/PREDICTED: transcription factor TCP13 [Vitis vinifera]
VIT_205s0020g00170	3019	120.765	45.7194	-1.38929	-		GO:0005739//mitochondrion	GO:0008168//methyltransferase activity	GO:0032259//methylation;GO:0048193//Golgi vesicle transport	gi|225439570|ref|XP_002264939.1|/0.0/PREDICTED: uncharacterized protein LOC100263765 [Vitis vinifera]
VIT_208s0007g05360	1820	31.4006	11.5711	-1.39323	-		-	-	-	gi|225426326|ref|XP_002269278.1|/2.13562E-84/PREDICTED: uncharacterized protein LOC100241044 [Vitis vinifera]
VIT_207s0005g00960	2680.89	71.8796	26.9304	-1.39592	-		GO:0005737//cytoplasm	GO:0004180//carboxypeptidase activity;GO:0005515//protein binding	-	gi|225438647|ref|XP_002281478.1|/0.0/PREDICTED: trafficking protein particle complex subunit 12-like [Vitis vinifera]
VIT_208s0007g02260	1593.38	51.8894	19.2301	-1.40346	-		GO:0005788//endoplasmic reticulum lumen;GO:0016021//integral component of membrane	-	GO:0009790//embryo development;GO:0010183//pollen tube guidance;GO:0035437//maintenance of protein localization in endoplasmic reticulum	gi|225424426|ref|XP_002281514.1|/0.0/PREDICTED: transmembrane anterior posterior transformation protein 1-like [Vitis vinifera]
VIT_215s0021g01060	2278.23	646.621	243.832	-1.40475	K07426;K10717;K10717;K15639;K07426		GO:0016023//cytoplasmic, membrane-bounded vesicle;GO:0016023//cytoplasmic, membrane-bounded vesicle;GO:0016023//cytoplasmic, membrane-bounded vesicle	GO:0004497//monooxygenase activity;GO:0004601//peroxidase activity;GO:0005506//iron ion binding;GO:0009055//electron carrier activity;GO:0016705//oxidoreductase activity, acting on paired donors, with incorporation or reduction of molecular oxygen;GO:0020037//heme binding;GO:0050616;GO:0004497//monooxygenase activity;GO:0004601//peroxidase activity;GO:0005506//iron ion binding;GO:0009055//electro…	GO:0006979//response to oxidative stress;GO:0007275//multicellular organism development;GO:0009826//unidimensional cell growth;GO:0022900//electron transport chain;GO:0032940//secretion by cell;GO:0042432;GO:0045487//gibberellin catabolic process;GO:0006979//response to oxidative stress;GO:0007275//multicellular organism development;GO:0009826//unidimensional cell growth;GO:0022900//electron tran…	gi|359489221|ref|XP_002269870.2|/0.0/PREDICTED: cytochrome P450 734A1-like [Vitis vinifera]
VIT_201s0011g03190	1020.84	175.601	65.8012	-1.40768	-		-	-	-	gi|297737427|emb|CBI26628.3|/1.35972E-155/unnamed protein product [Vitis vinifera]
VIT_212s0035g01045	1034	74.1132	27.2801	-1.4215	-		-	-	-	gi|388511058|gb|AFK43595.1|/3.63822E-15/unknown [Lotus japonicus]
VIT_208s0007g02210	1728.51	133.109	49.0835	-1.4279	-		GO:0009536//plastid	-	-	gi|225448663|ref|XP_002279904.1|/3.77914E-116/PREDICTED: uncharacterized protein LOC100260289 [Vitis vinifera]
VIT_200s0684g00030	1073	81.3533	29.4625	-1.44625	-		GO:0005634//nucleus;GO:0009507//chloroplast;GO:0005634//nucleus;GO:0009507//chloroplast	GO:0000166//nucleotide binding;GO:0005515//protein binding;GO:0000166//nucleotide binding;GO:0005515//protein binding	GO:0006487//protein N-linked glycosylation;GO:0006487//protein N-linked glycosylation	gi|297738971|emb|CBI28216.3|/0.0/unnamed protein product [Vitis vinifera]
VIT_209s0018g01680	1956	121.083	43.9978	-1.44769	-		-	-	-	gi|298204766|emb|CBI25264.3|/0.0/unnamed protein product [Vitis vinifera]
VIT_211s0016g05270	695	171.371	62.1994	-1.45306	-		GO:0009507//chloroplast	GO:0031072//heat shock protein binding;GO:0051082//unfolded protein binding	GO:0006098//pentose-phosphate shunt;GO:0006364//rRNA processing;GO:0009657//plastid organization;GO:0009773//photosynthetic electron transport in photosystem I;GO:0010207//photosystem II assembly;GO:0019288//isopentenyl diphosphate biosynthetic process, methylerythritol 4-phosphate pathway	gi|359484668|ref|XP_003633142.1|/4.41728E-63/PREDICTED: uncharacterized protein LOC100855207 [Vitis vinifera]
VIT_204s0044g00810	3908	62.6687	22.4413	-1.4565	-		GO:0005886//plasma membrane;GO:0016021//integral component of membrane;GO:0005886//plasma membrane;GO:0016021//integral component of membrane;GO:0005886//plasma membrane;GO:0016021//integral component of membrane	GO:0004497//monooxygenase activity;GO:0004497//monooxygenase activity;GO:0004497//monooxygenase activity	GO:0006612//protein targeting to membrane;GO:0009625//response to insect;GO:0009862//systemic acquired resistance, salicylic acid mediated signaling pathway;GO:0009963//positive regulation of flavonoid biosynthetic process;GO:0010363//regulation of plant-type hypersensitive response;GO:0010413//glucuronoxylan metabolic process;GO:0031348//negative regulation of defense response;GO:0045492//xylan …	gi|225447614|ref|XP_002273270.1|/1.65731E-86/PREDICTED: uncharacterized protein LOC100258038 [Vitis vinifera]
VIT_201s0011g02860	4775	134.53	48.0955	-1.47212	-		GO:0005886//plasma membrane;GO:0009507//chloroplast	-	-	gi|225446050|ref|XP_002271128.1|/0.0/PREDICTED: uncharacterized protein LOC100258100 [Vitis vinifera]
VIT_209s0054g00830	1036.12	99.4224	35.3713	-1.47491	-		GO:0005576//extracellular region;GO:0005634//nucleus;GO:0005576//extracellular region;GO:0005634//nucleus;GO:0005576//extracellular region;GO:0005634//nucleus;GO:0005576//extracellular region;GO:0005634//nucleus;GO:0005576//extracellular region;GO:0005634//nucleus;GO:0005576//extracellular region;GO:0005634//nucleus;GO:0005576//extracellular region;GO:0005634//nucleus;GO:0005576//extracellular re…	GO:0005515//protein binding;GO:0008289//lipid binding;GO:0005515//protein binding;GO:0008289//lipid binding;GO:0005515//protein binding;GO:0008289//lipid binding;GO:0005515//protein binding;GO:0008289//lipid binding;GO:0005515//protein binding;GO:0008289//lipid binding;GO:0005515//protein binding;GO:0008289//lipid binding;GO:0005515//protein binding;GO:0008289//lipid binding;GO:0005515//protein b…	-	gi|147854312|emb|CAN79114.1|/6.0139E-65/hypothetical protein VITISV_007010 [Vitis vinifera]
VIT_214s0108g00760	490	133.535	47.5288	-1.47834	-		GO:0005634//nucleus	GO:0003677//DNA binding	GO:0009640//photomorphogenesis;GO:0009733//response to auxin;GO:0009735//response to cytokinin;GO:0009737//response to abscisic acid;GO:0009739//response to gibberellin;GO:0009741//response to brassinosteroid;GO:0043392//negative regulation of DNA binding	gi|225452815|ref|XP_002283546.1|/1.31806E-47/PREDICTED: ZF-HD homeobox protein At4g24660-like [Vitis vinifera]
VIT_203s0038g00360	946	343.503	121.989	-1.48887	-		GO:0005634//nucleus;GO:0005737//cytoplasm	GO:0008936//nicotinamidase activity	GO:0006769//nicotinamide metabolic process;GO:0009737//response to abscisic acid;GO:0019365//pyridine nucleotide salvage;GO:0046497	gi|225464087|ref|XP_002270896.1|/4.66918E-144/PREDICTED: uncharacterized isochorismatase family protein pncA [Vitis vinifera]
VIT_214s0068g00830	1365.32	256.269	90.8576	-1.48966	-		-	-	-	gi|296082245|emb|CBI21250.3|/2.79357E-105/unnamed protein product [Vitis vinifera]
VIT_203s0063g01460	3674	162.311	57.2995	-1.49215	-		GO:0005634//nucleus;GO:0005634//nucleus;GO:0005634//nucleus;GO:0005634//nucleus	-	GO:0009416//response to light stimulus;GO:0042752//regulation of circadian rhythm;GO:0009416//response to light stimulus;GO:0042752//regulation of circadian rhythm;GO:0009416//response to light stimulus;GO:0042752//regulation of circadian rhythm;GO:0009416//response to light stimulus;GO:0042752//regulation of circadian rhythm	gi|359477506|ref|XP_002277982.2|/0.0/PREDICTED: protein TIME FOR COFFEE-like [Vitis vinifera]
VIT_218s0001g15650	1173	32.2753	11.0652	-1.49326	-		-	-	-	gi|359483816|ref|XP_002271436.2|/1.24675E-174/PREDICTED: uncharacterized protein LOC100245309 [Vitis vinifera]
VIT_205s0020g01830	1470	1934.03	685.608	-1.49531	-		GO:0005768//endosome;GO:0005794//Golgi apparatus;GO:0005802//trans-Golgi network;GO:0005886//plasma membrane;GO:0016021//integral component of membrane	-	-	gi|225432376|ref|XP_002276229.1|/6.27118E-58/PREDICTED: UPF0497 membrane protein 15 [Vitis vinifera]
VIT_219s0014g01270	1194.07	36.0887	12.3987	-1.49559	-		GO:0005576//extracellular region;GO:0005773//vacuole;GO:0005576//extracellular region;GO:0005773//vacuole;GO:0005576//extracellular region;GO:0005773//vacuole	-	GO:0007155//cell adhesion;GO:0007155//cell adhesion;GO:0007155//cell adhesion	gi|225439346|ref|XP_002270321.1|/0.0/PREDICTED: fasciclin-like arabinogalactan protein 17 [Vitis vinifera]
VIT_217s0000g04860	3162.61	61.4263	21.3713	-1.49644	-		GO:0005768//endosome;GO:0005774//vacuolar membrane;GO:0005794//Golgi apparatus;GO:0005802//trans-Golgi network;GO:0005886//plasma membrane;GO:0009507//chloroplast	-	GO:0006084//acetyl-CoA metabolic process;GO:0016126//sterol biosynthetic process;GO:0016132//brassinosteroid biosynthetic process	gi|225426625|ref|XP_002280860.1|/0.0/PREDICTED: major facilitator superfamily domain-containing protein 5 [Vitis vinifera]
VIT_204s0008g03160	1772.34	65.7131	21.8859	-1.55945	-		-	GO:0005516//calmodulin binding;GO:0008270//zinc ion binding;GO:0005516//calmodulin binding;GO:0008270//zinc ion binding;GO:0005516//calmodulin binding;GO:0008270//zinc ion binding;GO:0005516//calmodulin binding;GO:0008270//zinc ion binding	-	gi|359495531|ref|XP_003635012.1|/3.91192E-122/PREDICTED: uncharacterized protein LOC100852917 isoform 2 [Vitis vinifera]
VIT_201s0244g00170	1428.49	1156.53	390.901	-1.56341	-		GO:0009507//chloroplast;GO:0009507//chloroplast	-	-	gi|225425246|ref|XP_002269300.1|/6.29502E-57/PREDICTED: light-regulated protein [Vitis vinifera]
VIT_216s0098g01680	2201.44	117.632	39.3039	-1.56655	-		GO:0009507//chloroplast;GO:0009507//chloroplast;GO:0009507//chloroplast;GO:0009507//chloroplast;GO:0009507//chloroplast;GO:0009507//chloroplast	GO:0042802//identical protein binding;GO:0042802//identical protein binding;GO:0042802//identical protein binding;GO:0042802//identical protein binding;GO:0042802//identical protein binding;GO:0042802//identical protein binding	-	gi|225455344|ref|XP_002272297.1|/0.0/PREDICTED: nephrocystin-3-like [Vitis vinifera]
VIT_202s0025g04864	2027.22	526.944	177.164	-1.56923	-		GO:0005794//Golgi apparatus;GO:0005829//cytosol	-	GO:0010228//vegetative to reproductive phase transition of meristem;GO:0016926//protein desumoylation;GO:0050665//hydrogen peroxide biosynthetic process	gi|359496484|ref|XP_002265872.2|/0.0/PREDICTED: conserved oligomeric Golgi complex subunit 1-like [Vitis vinifera]
VIT_217s0000g07520	1763	138.979	46.3865	-1.57038	-		GO:0005886//plasma membrane;GO:0009536//plastid	-	-	gi|225447921|ref|XP_002265509.1|/0.0/PREDICTED: uncharacterized protein LOC100260050 [Vitis vinifera]
VIT_201s0026g02660	997	259.465	86.8022	-1.57292	-		GO:0009507//chloroplast;GO:0016020//membrane	-	GO:0016192//vesicle-mediated transport	gi|225464142|ref|XP_002265566.1|/7.1852E-125/PREDICTED: protein YIPF5 [Vitis vinifera]
VIT_203s0180g00110	843	160.872	53.5927	-1.57477	-		-	-	-	gi|359492067|ref|XP_002282310.2|/0.0/PREDICTED: uncharacterized protein LOC100266128 [Vitis vinifera]
VIT_209s0002g06780	900	181.912	60.5102	-1.5782	-		-	-	-	gi|297743450|emb|CBI36317.3|/4.1289E-108/unnamed protein product [Vitis vinifera]
VIT_205s0094g00090	879	138.33	45.8924	-1.57889	-		-	-	GO:0044763;GO:0044765//single-organism transport;GO:0050896//response to stimulus;GO:0044763;GO:0044765//single-organism transport;GO:0050896//response to stimulus	gi|225444657|ref|XP_002276822.1|/9.73748E-125/PREDICTED: uncharacterized protein LOC100264520 [Vitis vinifera]
VIT_205s0029g01420	1971	21.6638	6.83234	-1.58032	-		GO:0005739//mitochondrion;GO:0005794//Golgi apparatus;GO:0005886//plasma membrane	GO:0008168//methyltransferase activity	GO:0032259//methylation	gi|225445491|ref|XP_002285177.1|/2.86663E-167/PREDICTED: uncharacterized protein LOC100259301 [Vitis vinifera]
VIT_201s0010g03860	397	37.0566	11.962	-1.58237	-		GO:0016023//cytoplasmic, membrane-bounded vesicle;GO:0031225//anchored component of membrane	-	-	gi|359473760|ref|XP_003631356.1|/8.34906E-25/PREDICTED: uncharacterized protein LOC100852958 [Vitis vinifera]
VIT_216s0098g01380	912.25	238.32	78.7935	-1.5892	-		-	-	-	gi|225455302|ref|XP_002275349.1|/6.02253E-57/PREDICTED: protein yippee-like At4g27745 isoform 2 [Vitis vinifera]
VIT_205s0020g00970	1251.39	562.28	186.329	-1.59024	-		GO:0009507//chloroplast	-	GO:0000041//transition metal ion transport	gi|225440562|ref|XP_002276542.1|/3.27002E-61/PREDICTED: uncharacterized protein LOC100246012 [Vitis vinifera]
VIT_212s0028g02520	2146.52	17.8785	5.49727	-1.59656	-		-	-	GO:0044767//single-organism developmental process;GO:0048731//system development;GO:0044767//single-organism developmental process;GO:0048731//system development;GO:0044767//single-organism developmental process;GO:0048731//system development;GO:0044767//single-organism developmental process;GO:0048731//system development;GO:0044767//single-organism developmental process;GO:0048731//system develo…	gi|225446543|ref|XP_002279328.1|/2.39106E-157/PREDICTED: transcription factor TCP4 [Vitis vinifera]
VIT_213s0019g00490	2912.57	264.263	86.3907	-1.6061	-		-	-	-	gi|147852490|emb|CAN82747.1|/8.68807E-51/hypothetical protein VITISV_026523 [Vitis vinifera]
VIT_218s0001g00700	4206	28.1752	8.81213	-1.61025	-		GO:0005750//mitochondrial respiratory chain complex III;GO:0009505//plant-type cell wall;GO:0009897//external side of plasma membrane;GO:0009930//longitudinal side of cell surface;GO:0016021//integral component of membrane;GO:0016023//cytoplasmic, membrane-bounded vesicle;GO:0046658//anchored component of plasma membrane;GO:0005750//mitochondrial respiratory chain complex III;GO:0009505//plant-ty…	GO:0008121//ubiquinol-cytochrome-c reductase activity;GO:0009055//electron carrier activity;GO:0008121//ubiquinol-cytochrome-c reductase activity;GO:0009055//electron carrier activity;GO:0008121//ubiquinol-cytochrome-c reductase activity;GO:0009055//electron carrier activity	GO:0000271//polysaccharide biosynthetic process;GO:0000272//polysaccharide catabolic process;GO:0005982//starch metabolic process;GO:0006096//glycolytic process;GO:0006119//oxidative phosphorylation;GO:0006816//calcium ion transport;GO:0006833//water transport;GO:0006972//hyperosmotic response;GO:0007030//Golgi organization;GO:0007389//pattern specification process;GO:0008361//regulation of cell …	gi|225456559|ref|XP_002264600.1|/0.0/PREDICTED: protein COBRA [Vitis vinifera]
VIT_218s0122g01210	2781	52.7482	16.8208	-1.61355	-		-	-	-	gi|225457562|ref|XP_002272189.1|/4.93102E-124/PREDICTED: ser/Thr-rich protein T10 in DGCR region [Vitis vinifera]
VIT_218s0001g12680	1018.21	615.634	196.642	-1.64341	-		-	-	-	gi|225458245|ref|XP_002282213.1|/2.31763E-54/PREDICTED: uncharacterized protein LOC100259078 [Vitis vinifera]
VIT_217s0000g08730	3083.75	108.675	34.3213	-1.64524	-		GO:0005739//mitochondrion;GO:0009507//chloroplast	-	GO:0050832//defense response to fungus	gi|225424172|ref|XP_002284089.1|/1.27379E-83/PREDICTED: uncharacterized protein LOC100242324 [Vitis vinifera]
VIT_214s0030g00670	2459.27	35.351	10.8708	-1.64642	-		-	-	-	gi|296083089|emb|CBI22493.3|/1.40847E-36/unnamed protein product [Vitis vinifera]
VIT_214s0083g00650	4643	76.9785	24.089	-1.65102	-		GO:0005634//nucleus;GO:0005829//cytosol;GO:0012505//endomembrane system	GO:0004709//MAP kinase kinase kinase activity;GO:0005524//ATP binding;GO:0051020//GTPase binding	GO:0000186//activation of MAPKK activity;GO:0007178//transmembrane receptor protein serine/threonine kinase signaling pathway;GO:0009069//serine family amino acid metabolic process;GO:0009612//response to mechanical stimulus;GO:0009623//response to parasitic fungus;GO:0009814//defense response, incompatible interaction;GO:0019722//calcium-mediated signaling;GO:0071369//cellular response to ethyle…	gi|296088212|emb|CBI35727.3|/5.20551E-74/unnamed protein product [Vitis vinifera]
VIT_214s0081g00500	1913	338.358	106.959	-1.65581	-		-	-	-	gi|359487196|ref|XP_002269821.2|/0.0/PREDICTED: uncharacterized protein LOC100248068 [Vitis vinifera]
VIT_201s0011g04020	1589	339.982	107.473	-1.65582	-		GO:0005576//extracellular region;GO:0005886//plasma membrane;GO:0016023//cytoplasmic, membrane-bounded vesicle	-	-	gi|225424071|ref|XP_002282799.1|/4.30426E-98/PREDICTED: uncharacterized protein LOC100249231 [Vitis vinifera]
VIT_200s0286g00140	4410	54.9218	16.8954	-1.66499	-		-	-	-	gi|225427362|ref|XP_002282724.1|/4.24052E-79/PREDICTED: uncharacterized protein LOC100257499 [Vitis vinifera]
VIT_213s0067g02120	1333.84	25.4603	7.59717	-1.66634	-		GO:0005768//endosome;GO:0005794//Golgi apparatus;GO:0005802//trans-Golgi network;GO:0009507//chloroplast;GO:0016023//cytoplasmic, membrane-bounded vesicle;GO:0005768//endosome;GO:0005794//Golgi apparatus;GO:0005802//trans-Golgi network;GO:0009507//chloroplast;GO:0016023//cytoplasmic, membrane-bounded vesicle	-	-	gi|225444688|ref|XP_002277730.1|/0.0/PREDICTED: uncharacterized protein LOC100247308 [Vitis vinifera]
VIT_200s0187g00130	1936	190.954	59.6402	-1.66864	-		GO:0043231//intracellular membrane-bounded organelle	-	-	gi|225448701|ref|XP_002280623.1|/5.70812E-116/PREDICTED: uncharacterized protein LOC100251828 [Vitis vinifera]
VIT_215s0045g00880	2489	28.7252	8.57852	-1.67373	-		GO:0005794//Golgi apparatus;GO:0005886//plasma membrane;GO:0016021//integral component of membrane;GO:0016023//cytoplasmic, membrane-bounded vesicle	-	GO:0006084//acetyl-CoA metabolic process;GO:0016126//sterol biosynthetic process;GO:0016132//brassinosteroid biosynthetic process	gi|225448083|ref|XP_002276310.1|/0.0/PREDICTED: transmembrane protein 87B [Vitis vinifera]
VIT_201s0010g00940	1096.27	211.572	65.8229	-1.6752	-		-	-	-	gi|297738227|emb|CBI27428.3|/2.64504E-83/unnamed protein product [Vitis vinifera]
VIT_218s0001g07270	8520.12	115.393	35.5993	-1.67948	-		GO:0005634//nucleus;GO:0005829//cytosol;GO:0005886//plasma membrane;GO:0016021//integral component of membrane	-	GO:0006817//phosphate ion transport;GO:0009960//endosperm development;GO:0010017//red or far-red light signaling pathway;GO:0010468//regulation of gene expression;GO:0016036//cellular response to phosphate starvation;GO:0045793//positive regulation of cell size;GO:0080113//regulation of seed growth	gi|255578270|ref|XP_002530002.1|/0.0/xenotropic and polytropic murine leukemia virus receptor pho1, putative [Ricinus communis]
VIT_216s0022g01850	713	18.1214	5.20624	-1.68572	-		-	GO:0005515//protein binding	GO:0006979//response to oxidative stress;GO:0009646//response to absence of light;GO:0009751//response to salicylic acid;GO:0009816//defense response to bacterium, incompatible interaction;GO:0010200//response to chitin	gi|225448363|ref|XP_002268520.1|/0.0/PREDICTED: nematode resistance protein-like HSPRO2 isoform 1 [Vitis vinifera]
VIT_216s0013g01070	1077	65.98	19.9735	-1.69337	-		GO:0005634//nucleus;GO:0005886//plasma membrane	-	GO:0006970//response to osmotic stress;GO:0009697//salicylic acid biosynthetic process;GO:0009863//salicylic acid mediated signaling pathway;GO:0010167//response to nitrate;GO:0015706//nitrate transport;GO:0031348//negative regulation of defense response;GO:0045087//innate immune response;GO:0046686//response to cadmium ion;GO:0048767//root hair elongation	gi|225454355|ref|XP_002278383.1|/1.45381E-122/PREDICTED: uncharacterized protein LOC100267039 [Vitis vinifera]
VIT_200s0389g00030	2459	111.214	33.9564	-1.69352	-		-	GO:0000166//nucleotide binding;GO:0003676//nucleic acid binding	-	gi|297743798|emb|CBI36681.3|/1.04066E-171/unnamed protein product [Vitis vinifera]
VIT_200s0366g00020	2814.07	931.374	287.315	-1.69458	-		-	-	-	gi|225447649|ref|XP_002274919.1|/3.05954E-38/PREDICTED: uncharacterized protein LOC100261290 [Vitis vinifera]
VIT_200s0199g00240	1762	23.3765	6.78437	-1.69647	-		GO:0005739//mitochondrion;GO:0005773//vacuole;GO:0005829//cytosol;GO:0005886//plasma membrane;GO:0009505//plant-type cell wall;GO:0009506//plasmodesma;GO:0009507//chloroplast;GO:0048046//apoplast	GO:0008762//UDP-N-acetylmuramate dehydrogenase activity;GO:0009055//electron carrier activity;GO:0050468;GO:0050660//flavin adenine dinucleotide binding	GO:0002679//respiratory burst involved in defense response;GO:0006040//amino sugar metabolic process;GO:0006612//protein targeting to membrane;GO:0006979//response to oxidative stress;GO:0009611//response to wounding;GO:0009821//alkaloid biosynthetic process;GO:0010200//response to chitin;GO:0010363//regulation of plant-type hypersensitive response;GO:0030968//endoplasmic reticulum unfolded prote…	gi|147825300|emb|CAN62277.1|/2.77732E-28/hypothetical protein VITISV_011134 [Vitis vinifera]
VIT_208s0040g00480	1498.24	54.5813	16.4093	-1.69673	-		-	-	-	gi|225440226|ref|XP_002278583.1|/2.05917E-113/PREDICTED: uncharacterized protein LOC100249911 [Vitis vinifera]
VIT_219s0015g01250	1531	95.2575	28.9478	-1.69719	-		-	-	GO:0006979//response to oxidative stress	gi|225439115|ref|XP_002266425.1|/1.18327E-135/PREDICTED: uncharacterized protein LOC100267210 [Vitis vinifera]
VIT_201s0244g00160	2006	1147.78	353.059	-1.69911	-		GO:0005634//nucleus;GO:0005634//nucleus	-	-	gi|296088178|emb|CBI35670.3|/2.84978E-110/unnamed protein product [Vitis vinifera]
VIT_210s0042g00460	3325.44	38.4239	11.3952	-1.7003	-		GO:0005622//intracellular	-	GO:0009742//brassinosteroid mediated signaling pathway;GO:0016049//cell growth;GO:0035265//organ growth	gi|359478246|ref|XP_003632091.1|/5.22563E-46/PREDICTED: uncharacterized protein LOC100854957 [Vitis vinifera]
VIT_219s0015g02910	3158.48	256.244	78.0369	-1.70737	K07426;K07426;K07426;K15638;K07424		-	GO:0004497//monooxygenase activity;GO:0005506//iron ion binding;GO:0009055//electron carrier activity;GO:0016705//oxidoreductase activity, acting on paired donors, with incorporation or reduction of molecular oxygen;GO:0020037//heme binding;GO:0004497//monooxygenase activity;GO:0005506//iron ion binding;GO:0009055//electron carrier activity;GO:0016705//oxidoreductase activity, acting on paired do…	GO:0055114//oxidation-reduction process;GO:0055114//oxidation-reduction process;GO:0055114//oxidation-reduction process	gi|296090119|emb|CBI39938.3|/2.14179E-151/unnamed protein product [Vitis vinifera]
VIT_204s0008g03670	2308	21.4577	5.97068	-1.7442	-		-	-	-	gi|296081871|emb|CBI20876.3|/0.0/unnamed protein product [Vitis vinifera]
VIT_212s0057g00950	888	149.2	42.001	-1.81361	-		-	-	-	gi|359485764|ref|XP_003633331.1|/1.85201E-77/PREDICTED: uncharacterized protein LOC100854493 [Vitis vinifera]
VIT_216s0115g00080	587	21.3204	5.61518	-1.81521	-		GO:0005739//mitochondrion;GO:0016020//membrane;GO:0005739//mitochondrion;GO:0016020//membrane;GO:0005739//mitochondrion;GO:0016020//membrane;GO:0005739//mitochondrion;GO:0016020//membrane	-	-	gi|225460012|ref|XP_002271455.1|/0.0/PREDICTED: uncharacterized protein LOC100249908 [Vitis vinifera]
VIT_208s0040g00310	2814	129.779	36.0922	-1.82862	-		GO:0005739//mitochondrion;GO:0009536//plastid;GO:0016023//cytoplasmic, membrane-bounded vesicle	GO:0005509//calcium ion binding	-	gi|359475867|ref|XP_003631765.1|/0.0/PREDICTED: calcium uptake protein 1, mitochondrial-like [Vitis vinifera]
VIT_204s0008g01320	1330.99	89.2128	22.4212	-1.96306	-		GO:0009507//chloroplast;GO:0016020//membrane;GO:0009507//chloroplast;GO:0016020//membrane;GO:0009507//chloroplast;GO:0016020//membrane;GO:0009507//chloroplast;GO:0016020//membrane;GO:0009507//chloroplast;GO:0016020//membrane;GO:0009507//chloroplast;GO:0016020//membrane;GO:0009507//chloroplast;GO:0016020//membrane;GO:0009507//chloroplast;GO:0016020//membrane	-	GO:0015996//chlorophyll catabolic process;GO:0015996//chlorophyll catabolic process;GO:0015996//chlorophyll catabolic process;GO:0015996//chlorophyll catabolic process;GO:0015996//chlorophyll catabolic process;GO:0015996//chlorophyll catabolic process;GO:0015996//chlorophyll catabolic process;GO:0015996//chlorophyll catabolic process	gi|225429556|ref|XP_002279783.1|/7.96122E-99/PREDICTED: uncharacterized protein ycf36 [Vitis vinifera]
VIT_205s0020g04800	1419	316.906	80.5232	-1.96834	-		-	-	-	gi|147832537|emb|CAN74894.1|/1.12275E-24/hypothetical protein VITISV_029984 [Vitis vinifera]
VIT_204s0044g01560	2603.35	384.487	97.7349	-1.9692	-		GO:0005886//plasma membrane;GO:0005886//plasma membrane;GO:0005886//plasma membrane;GO:0005886//plasma membrane;GO:0005886//plasma membrane	-	GO:0000272//polysaccharide catabolic process;GO:0005982//starch metabolic process;GO:0009664//plant-type cell wall organization;GO:0010075//regulation of meristem growth;GO:0000272//polysaccharide catabolic process;GO:0005982//starch metabolic process;GO:0009664//plant-type cell wall organization;GO:0010075//regulation of meristem growth;GO:0000272//polysaccharide catabolic process;GO:0005982//st…	gi|225452142|ref|XP_002270234.1|/0.0/PREDICTED: uncharacterized protein LOC100266440 [Vitis vinifera]
VIT_208s0007g06270	2254	82.1993	20.1769	-1.99363	-		-	-	-	gi|225443051|ref|XP_002271365.1|/5.1912E-81/PREDICTED: uncharacterized protein LOC100242170 [Vitis vinifera]
VIT_200s0187g00080	2045	98.7156	23.9518	-2.01534	-		-	-	-	gi|147854421|emb|CAN82794.1|/1.71224E-5/hypothetical protein VITISV_013491 [Vitis vinifera]
VIT_213s0019g00900	628	69.0777	16.3887	-2.03489	-		GO:0005634//nucleus;GO:0009507//chloroplast;GO:0031977//thylakoid lumen;GO:0005634//nucleus;GO:0009507//chloroplast;GO:0031977//thylakoid lumen;GO:0005634//nucleus;GO:0009507//chloroplast;GO:0031977//thylakoid lumen;GO:0009507//chloroplast;GO:0031977//thylakoid lumen	GO:0003755//peptidyl-prolyl cis-trans isomerase activity;GO:0009055//electron carrier activity;GO:0015035//protein disulfide oxidoreductase activity;GO:0003755//peptidyl-prolyl cis-trans isomerase activity;GO:0009055//electron carrier activity;GO:0015035//protein disulfide oxidoreductase activity;GO:0003755//peptidyl-prolyl cis-trans isomerase activity;GO:0009055//electron carrier activity;GO:001…	GO:0000413//protein peptidyl-prolyl isomerization;GO:0006457//protein folding;GO:0035556//intracellular signal transduction;GO:0045454//cell redox homeostasis;GO:0000413//protein peptidyl-prolyl isomerization;GO:0006457//protein folding;GO:0035556//intracellular signal transduction;GO:0045454//cell redox homeostasis;GO:0000413//protein peptidyl-prolyl isomerization;GO:0006457//protein folding;GO:…	gi|359492818|ref|XP_002284291.2|/0.0/PREDICTED: uncharacterized protein LOC100257505 isoform 1 [Vitis vinifera]
VIT_213s0156g00420	548	22.3614	4.9001	-2.05784	-		-	-	-	gi|297738999|emb|CBI28244.3|/1.29249E-30/unnamed protein product [Vitis vinifera]
VIT_213s0019g00320	1594	29.5326	6.58847	-2.06463	-		GO:0009505//plant-type cell wall;GO:0009506//plasmodesma;GO:0048046//apoplast	GO:0004871//signal transducer activity	GO:0007267//cell-cell signaling;GO:0019722//calcium-mediated signaling	gi|225450772|ref|XP_002283709.1|/1.81447E-49/PREDICTED: uncharacterized protein LOC100263186 [Vitis vinifera]
VIT_215s0021g02270	774	31.7544	7.08251	-2.07155	-		-	-	-	gi|225453478|ref|XP_002277033.1|/2.93577E-60/PREDICTED: uncharacterized protein LOC100244418 [Vitis vinifera]
VIT_218s0001g04520	1171.93	278.637	65.4516	-2.0795	-		-	-	-	gi|225459411|ref|XP_002285819.1|/3.43816E-31/PREDICTED: uncharacterized protein LOC100247254 [Vitis vinifera]
VIT_206s0061g00570	774	18.6587	3.85805	-2.10625	-		-	-	-	gi|296084199|emb|CBI24587.3|/9.99821E-49/unnamed protein product [Vitis vinifera]
VIT_200s0477g00040	1330	86.7299	19.5592	-2.11398	-		GO:0005739//mitochondrion	GO:0005543//phospholipid binding;GO:0032440//2-alkenal reductase [NAD(P)] activity	GO:0010167//response to nitrate;GO:0015706//nitrate transport;GO:0055114//oxidation-reduction process	gi|359496894|ref|XP_002263086.2|/0.0/PREDICTED: putative clathrin assembly protein At4g40080-like [Vitis vinifera]
VIT_213s0019g01200	697	40.624	8.81213	-2.12861	-		GO:0005634//nucleus	-	GO:0006949//syncytium formation	gi|225449527|ref|XP_002278885.1|/8.89669E-121/PREDICTED: uncharacterized protein LOC100241117 [Vitis vinifera]
VIT_215s0048g00190	1466.46	69.3097	15.3181	-2.13348	-		-	-	-	gi|297737444|emb|CBI26645.3|/4.41925E-88/unnamed protein product [Vitis vinifera]
VIT_205s0102g00310	951	223.458	50.3397	-2.13659	-		GO:0009507//chloroplast	GO:0019899//enzyme binding;GO:0046906//tetrapyrrole binding	GO:0006098//pentose-phosphate shunt;GO:0006364//rRNA processing;GO:0009073//aromatic amino acid family biosynthetic process;GO:0009965//leaf morphogenesis;GO:0010019//chloroplast-nucleus signaling pathway;GO:0010207//photosystem II assembly;GO:0015995//chlorophyll biosynthetic process;GO:0016117//carotenoid biosynthetic process;GO:0019344//cysteine biosynthetic process;GO:0030154//cell differenti…	gi|225433870|ref|XP_002265252.1|/5.17587E-105/PREDICTED: tetrapyrrole-binding protein, chloroplastic [Vitis vinifera]
VIT_214s0066g01640	2198.68	146.143	32.7361	-2.13749	K01623;K02940;K02940;K01623;K02940;K01623;K02940;K01623;K01623;K02940		GO:0016020//membrane;GO:0016020//membrane;GO:0016020//membrane;GO:0016020//membrane;GO:0016020//membrane	-	-	gi|296087698|emb|CBI34954.3|/1.32056E-119/unnamed protein product [Vitis vinifera]
VIT_208s0040g03230	1085	65.1503	14.2681	-2.14333	-		-	-	-	gi|359497319|ref|XP_002268917.2|/0.0/PREDICTED: uncharacterized protein LOC100256691, partial [Vitis vinifera]
VIT_214s0060g02480	2420	73.6713	16.1186	-2.15006	-		-	-	-	gi|296089669|emb|CBI39488.3|/2.02724E-110/unnamed protein product [Vitis vinifera]
VIT_200s0225g00080	1824	24.1551	4.96198	-2.15019	-		-	-	GO:0006950//response to stress;GO:0007568//aging;GO:0009620//response to fungus	gi|359486474|ref|XP_003633449.1|/1.10887E-85/PREDICTED: uncharacterized protein LOC100853125 [Vitis vinifera]
VIT_212s0034g00060	1632	92.1503	20.2173	-2.15453	-		-	GO:0005515//protein binding	-	gi|225443892|ref|XP_002277952.1|/2.71332E-58/PREDICTED: protein TIFY 5A-like [Vitis vinifera]
VIT_208s0032g00200	740	16.9851	3.3104	-2.16345	-		-	-	-	gi|296089283|emb|CBI39055.3|/1.21642E-36/unnamed protein product [Vitis vinifera]
VIT_205s0077g01570	1159	2092.77	462.209	-2.17729	-		GO:0044464	-	-	gi|359480520|ref|XP_003632481.1|/4.72935E-29/PREDICTED: uncharacterized protein At5g65660-like [Vitis vinifera]
VIT_209s0002g03460	1563	67.1401	14.1444	-2.19837	-		GO:0005634//nucleus	GO:0016491//oxidoreductase activity	GO:0055114//oxidation-reduction process	gi|225442462|ref|XP_002283654.1|/0.0/PREDICTED: clavaminate synthase-like protein At3g21360 [Vitis vinifera]
VIT_207s0129g00360	1823	9.82099	1.64712	-2.20369	-		GO:0005576//extracellular region;GO:0009505//plant-type cell wall;GO:0016020//membrane;GO:0005576//extracellular region;GO:0009505//plant-type cell wall;GO:0016020//membrane;GO:0005576//extracellular region;GO:0009505//plant-type cell wall;GO:0016020//membrane;GO:0005576//extracellular region;GO:0009505//plant-type cell wall;GO:0016020//membrane	-	GO:0006949//syncytium formation;GO:0009664//plant-type cell wall organization;GO:0010114//response to red light;GO:0010119//regulation of stomatal movement;GO:0006949//syncytium formation;GO:0009664//plant-type cell wall organization;GO:0010114//response to red light;GO:0010119//regulation of stomatal movement;GO:0006949//syncytium formation;GO:0009664//plant-type cell wall organization;GO:001011…	gi|225464253|ref|XP_002269517.1|/2.23765E-114/PREDICTED: expansin-A15 [Vitis vinifera]
VIT_203s0038g01510	580	3996.05	859.845	-2.21561	-		-	-	-	gi|359475056|ref|XP_003631577.1|/2.44311E-18/PREDICTED: uncharacterized protein LOC100243519 [Vitis vinifera]
VIT_203s0038g01960	1224	37.9265	7.65905	-2.21916	-		GO:0005576//extracellular region	GO:0016884//carbon-nitrogen ligase activity, with glutamine as amido-N-donor	-	gi|225427942|ref|XP_002276017.1|/5.83077E-141/PREDICTED: uncharacterized protein LOC100257238 [Vitis vinifera]
VIT_201s0010g00710	3649.41	165.634	34.9598	-2.22429	-		GO:0000785//chromatin;GO:0005634//nucleus;GO:0005829//cytosol	GO:0003682//chromatin binding;GO:0042393//histone binding	GO:0006094//gluconeogenesis;GO:0006096//glycolytic process;GO:0006334//nucleosome assembly;GO:0008283//cell proliferation;GO:0009408//response to heat;GO:0009409//response to cold;GO:0009617//response to bacterium;GO:0009651//response to salt stress;GO:0009738//abscisic acid-activated signaling pathway;GO:0010311//lateral root formation;GO:0030154//cell differentiation;GO:0046686//response to cad…	gi|297738055|emb|CBI27256.3|/2.4417E-35/unnamed protein product [Vitis vinifera]
VIT_203s0038g02030	1636	22.7098	4.32079	-2.23953	-		GO:0005739//mitochondrion	-	-	gi|225459050|ref|XP_002285635.1|/1.0147E-40/PREDICTED: uncharacterized protein C6C3.02c [Vitis vinifera]
VIT_211s0016g03640	1215.12	12.501	2.14115	-2.24884	-		GO:0016020//membrane;GO:0016020//membrane;GO:0016020//membrane;GO:0016020//membrane	GO:0016798//hydrolase activity, acting on glycosyl bonds;GO:0043169//cation binding;GO:0016798//hydrolase activity, acting on glycosyl bonds;GO:0043169//cation binding;GO:0016798//hydrolase activity, acting on glycosyl bonds;GO:0043169//cation binding;GO:0016798//hydrolase activity, acting on glycosyl bonds;GO:0043169//cation binding	GO:0005975//carbohydrate metabolic process;GO:0005975//carbohydrate metabolic process;GO:0005975//carbohydrate metabolic process;GO:0005975//carbohydrate metabolic process	gi|225423537|ref|XP_002271714.1|/5.93834E-92/PREDICTED: uncharacterized protein LOC100249028 [Vitis vinifera]
VIT_209s0002g06980	1375.2	224.537	46.5515	-2.25496	-		GO:0009570//chloroplast stroma;GO:0009579//thylakoid;GO:0009570//chloroplast stroma;GO:0009579//thylakoid;GO:0009570//chloroplast stroma;GO:0009579//thylakoid;GO:0009570//chloroplast stroma;GO:0009579//thylakoid	-	GO:0010478//chlororespiration;GO:0010478//chlororespiration;GO:0010478//chlororespiration;GO:0010478//chlororespiration	gi|225442943|ref|XP_002266165.1|/8.39351E-75/PREDICTED: uncharacterized protein LOC100264489 isoform 1 [Vitis vinifera]
VIT_212s0028g01030	766	97.2355	19.1476	-2.30756	-		-	GO:0016614//oxidoreductase activity, acting on CH-OH group of donors;GO:0050660//flavin adenine dinucleotide binding	GO:0055114//oxidation-reduction process	gi|225446783|ref|XP_002278640.1|/1.5666E-97/PREDICTED: uncharacterized protein LOC100250574 [Vitis vinifera]
VIT_208s0040g03400	2517.5	111.268	21.9272	-2.31107	-		-	-	-	gi|359485789|ref|XP_002271489.2|/1.53966E-25/PREDICTED: uncharacterized protein LOC100266676 [Vitis vinifera]
VIT_206s0009g02480	2393.17	23.9058	4.30293	-2.31688	-		-	-	-	gi|359492270|ref|XP_003634392.1|/2.09481E-67/PREDICTED: uncharacterized protein LOC100249003 [Vitis vinifera]
VIT_205s0077g01560	1131	701.642	140.132	-2.31886	-		-	-	-	gi|225447661|ref|XP_002275421.1|/1.84348E-28/PREDICTED: uncharacterized protein LOC100257932 [Vitis vinifera]
VIT_208s0007g03770	1369.29	289.387	57.0716	-2.32967	-		GO:0005634//nucleus;GO:0005886//plasma membrane;GO:0005634//nucleus;GO:0005886//plasma membrane;GO:0009507//chloroplast;GO:0005634//nucleus;GO:0005886//plasma membrane	-	GO:0009733//response to auxin;GO:0009733//response to auxin;GO:0007020//microtubule nucleation;GO:0009733//response to auxin	gi|225440964|ref|XP_002283313.1|/1.2889E-48/PREDICTED: uncharacterized protein LOC100256294 [Vitis vinifera]
VIT_200s2175g00005	990	18.5437	3.16872	-2.33882	-		GO:0005634//nucleus	GO:0003677//DNA binding;GO:0008270//zinc ion binding	GO:0006979//response to oxidative stress;GO:0009409//response to cold;GO:0009414//response to water deprivation;GO:0009611//response to wounding;GO:0009644//response to high light intensity;GO:0009737//response to abscisic acid;GO:0010117//photoprotection;GO:0010200//response to chitin;GO:0015979//photosynthesis;GO:0035264//multicellular organism growth;GO:0042538//hyperosmotic salinity response	gi|225458814|ref|XP_002285260.1|/5.18877E-109/PREDICTED: zinc finger protein ZAT10-like [Vitis vinifera]
VIT_203s0063g02530	2016.12	164.022	31.583	-2.35409	-		-	-	-	gi|297741455|emb|CBI32586.3|/1.70464E-126/unnamed protein product [Vitis vinifera]
VIT_205s0077g01580	738	12561.4	2451.16	-2.35717	-		GO:0005777//peroxisome;GO:0005777//peroxisome;GO:0005777//peroxisome;GO:0005777//peroxisome	-	GO:0009658//chloroplast organization;GO:0009658//chloroplast organization;GO:0009658//chloroplast organization;GO:0009658//chloroplast organization	gi|225428965|ref|XP_002263972.1|/0.0/PREDICTED: uncharacterized protein LOC100242868 [Vitis vinifera]
VIT_208s0007g06040	1726	2615.93	505.042	-2.37142	-		GO:0005768//endosome;GO:0005774//vacuolar membrane;GO:0005794//Golgi apparatus;GO:0005802//trans-Golgi network;GO:0005886//plasma membrane;GO:0009507//chloroplast;GO:0005768//endosome;GO:0005774//vacuolar membrane;GO:0005794//Golgi apparatus;GO:0005802//trans-Golgi network;GO:0005886//plasma membrane;GO:0009507//chloroplast;GO:0005768//endosome;GO:0005774//vacuolar membrane;GO:0005794//Golgi appa…	-	GO:0006084//acetyl-CoA metabolic process;GO:0016126//sterol biosynthetic process;GO:0016132//brassinosteroid biosynthetic process;GO:0006084//acetyl-CoA metabolic process;GO:0016126//sterol biosynthetic process;GO:0016132//brassinosteroid biosynthetic process;GO:0006084//acetyl-CoA metabolic process;GO:0016126//sterol biosynthetic process;GO:0016132//brassinosteroid biosynthetic process	gi|225455290|ref|XP_002274807.1|/0.0/PREDICTED: major facilitator superfamily domain-containing protein 5 [Vitis vinifera]
VIT_213s0064g01750	1585.22	10.2687	1.43993	-2.40258	-		-	-	-	gi|225447663|ref|XP_002275464.1|/7.80071E-33/PREDICTED: uncharacterized protein LOC100252779 [Vitis vinifera]
VIT_203s0063g00340	1444.44	239.731	43.4429	-2.44752	-		-	-	GO:0009628//response to abiotic stimulus;GO:0009628//response to abiotic stimulus;GO:0007623//circadian rhythm;GO:0080167//response to karrikin	gi|359475370|ref|XP_003631670.1|/1.43283E-127/PREDICTED: uncharacterized protein LOC100854716 [Vitis vinifera]
VIT_211s0016g05540	1346	87.6179	15.2975	-2.47084	-		-	GO:0005507//copper ion binding;GO:0009055//electron carrier activity	-	gi|225445555|ref|XP_002282262.1|/4.03199E-114/PREDICTED: uncharacterized protein LOC100268054 [Vitis vinifera]
VIT_206s0004g01020	1652	25.6546	4.10866	-2.47434	-		GO:0005634//nucleus;GO:0005829//cytosol;GO:0005886//plasma membrane	GO:0005515//protein binding	-	gi|359475193|ref|XP_002282160.2|/0.0/PREDICTED: protein CYPRO4-like [Vitis vinifera]
VIT_202s0154g00310	762	8.92184	1.0912	-2.47976	-		GO:0005886//plasma membrane;GO:0016023//cytoplasmic, membrane-bounded vesicle;GO:0031225//anchored component of membrane	GO:0005507//copper ion binding;GO:0009055//electron carrier activity	-	gi|225426627|ref|XP_002280885.1|/2.53266E-97/PREDICTED: early nodulin-like protein 1 [Vitis vinifera]
VIT_216s0050g01260	858	91.3649	15.8328	-2.48312	-		GO:0009535//chloroplast thylakoid membrane	GO:0004674//protein serine/threonine kinase activity;GO:0005524//ATP binding	GO:0006468//protein phosphorylation;GO:0009069//serine family amino acid metabolic process	gi|225464604|ref|XP_002274943.1|/9.77245E-99/PREDICTED: uncharacterized LOC100266405 [Vitis vinifera]
VIT_214s0068g01210	1708.71	18.5457	2.73832	-2.51297	-		-	GO:0005509//calcium ion binding	-	gi|225446969|ref|XP_002265035.1|/1.13592E-72/PREDICTED: uncharacterized protein LOC100260129 [Vitis vinifera]
VIT_206s0004g05960	1011.49	1659.87	289.583	-2.51647	-		-	-	-	gi|225434704|ref|XP_002280988.1|/6.09732E-86/PREDICTED: uncharacterized protein LOC100258718 [Vitis vinifera]
VIT_218s0001g10480	1902.97	169.707	29.0716	-2.52021	-		-	-	GO:0009409//response to cold;GO:0080167//response to karrikin;GO:0009409//response to cold;GO:0080167//response to karrikin	gi|302142313|emb|CBI19516.3|/7.70843E-137/unnamed protein product [Vitis vinifera]
VIT_200s0753g00010	1140	40.706	6.56605	-2.5239	-		GO:0005634//nucleus;GO:0009506//plasmodesma	GO:0046872//metal ion binding	GO:0030001//metal ion transport	gi|296088214|emb|CBI35729.3|/2.0538E-31/unnamed protein product [Vitis vinifera]
VIT_200s0225g00120	559	15.4074	2.16178	-2.52677	-		-	-	-	gi|359477137|ref|XP_002271531.2|/2.27368E-19/PREDICTED: uncharacterized protein LOC100248329 [Vitis vinifera]
VIT_211s0052g00240	1324	41.1985	6.5373	-2.54678	-		GO:0005737//cytoplasm	GO:0010175//sphingosine transmembrane transporter activity;GO:0017089//glycolipid transporter activity;GO:0051861//glycolipid binding	GO:0008219//cell death;GO:0009751//response to salicylic acid;GO:0009816//defense response to bacterium, incompatible interaction;GO:0015844//monoamine transport;GO:0015850//organic hydroxy compound transport;GO:0046836//glycolipid transport	gi|297735457|emb|CBI17897.3|/0.0/unnamed protein product [Vitis vinifera]
VIT_212s0028g01370	1536	132.543	21.0825	-2.6173	-		GO:0005576//extracellular region	-	-	gi|359485318|ref|XP_002278078.2|/0.0/PREDICTED: uncharacterized protein LOC100267770 [Vitis vinifera]
VIT_216s0148g00030	1882	22.4148	3.10061	-2.63044	-		-	-	-	gi|225437509|ref|XP_002275068.1|/3.74388E-160/PREDICTED: uncharacterized protein LOC100262334 [Vitis vinifera]
VIT_203s0063g01960	872	147.571	23.2883	-2.63191	-		GO:0005618//cell wall;GO:0005737//cytoplasm;GO:0005886//plasma membrane;GO:0016363//nuclear matrix	GO:0005344//oxygen transporter activity;GO:0005506//iron ion binding;GO:0019825//oxygen binding;GO:0020037//heme binding	GO:0006950//response to stress;GO:0009399//nitrogen fixation;GO:0015671//oxygen transport	gi|297741406|emb|CBI32537.3|/3.78302E-66/unnamed protein product [Vitis vinifera]
VIT_211s0103g00530	2460.18	54.465	8.17371	-2.64722	-		-	-	-	gi|296090290|emb|CBI40109.3|/2.39485E-140/unnamed protein product [Vitis vinifera]
VIT_211s0016g04960	1884.57	41.6394	6.11506	-2.64964	-		GO:0009507//chloroplast;GO:0009507//chloroplast	GO:0004497//monooxygenase activity;GO:0005506//iron ion binding;GO:0009055//electron carrier activity;GO:0016705//oxidoreductase activity, acting on paired donors, with incorporation or reduction of molecular oxygen;GO:0020037//heme binding;GO:0036361//racemase activity, acting on amino acids and derivatives;GO:0004497//monooxygenase activity;GO:0005506//iron ion binding;GO:0009055//electron carr…	GO:0006520//cellular amino acid metabolic process;GO:0055114//oxidation-reduction process;GO:0006520//cellular amino acid metabolic process;GO:0055114//oxidation-reduction process	gi|359484398|ref|XP_003633103.1|/2.86175E-92/PREDICTED: uncharacterized protein LOC100853647 [Vitis vinifera]
VIT_208s0040g02650	1707.73	60.0166	8.72963	-2.6973	-		GO:0009507//chloroplast	-	GO:0032502//developmental process;GO:0032502//developmental process	gi|225439854|ref|XP_002278074.1|/2.65956E-32/PREDICTED: uncharacterized protein LOC100256772 [Vitis vinifera]
VIT_216s0100g00330	970	36.1979	4.98261	-2.71639	-		GO:0009507//chloroplast	-	-	gi|225455489|ref|XP_002280422.1|/1.18645E-116/PREDICTED: uncharacterized protein LOC100247067 [Vitis vinifera]
VIT_217s0000g02250	2623	29.1092	3.85015	-2.73368	-		GO:0009507//chloroplast;GO:0009507//chloroplast;GO:0009507//chloroplast	GO:0004497//monooxygenase activity;GO:0005506//iron ion binding;GO:0009055//electron carrier activity;GO:0016705//oxidoreductase activity, acting on paired donors, with incorporation or reduction of molecular oxygen;GO:0020037//heme binding;GO:0050660//flavin adenine dinucleotide binding;GO:0004497//monooxygenase activity;GO:0005506//iron ion binding;GO:0009055//electron carrier activity;GO:00167…	GO:0015979//photosynthesis;GO:0055114//oxidation-reduction process;GO:0015979//photosynthesis;GO:0055114//oxidation-reduction process;GO:0015979//photosynthesis;GO:0055114//oxidation-reduction process	gi|359491515|ref|XP_002278822.2|/0.0/PREDICTED: uncharacterized protein Cbei_0202-like [Vitis vinifera]
VIT_200s0469g00010	3100	23.9137	2.94079	-2.78475	-		-	-	-	gi|297739702|emb|CBI29884.3|/3.05306E-17/unnamed protein product [Vitis vinifera]
VIT_213s0084g00570	3761	117.684	16.5226	-2.78689	-		-	-	-	gi|225447653|ref|XP_002275082.1|/9.12754E-38/PREDICTED: uncharacterized protein LOC100251039 [Vitis vinifera]
VIT_216s0148g00280	1248	25.4222	3.1475	-2.78941	-		-	-	-	gi|225447665|ref|XP_002275507.1|/8.09837E-31/PREDICTED: uncharacterized protein LOC100247673 [Vitis vinifera]
VIT_219s0014g01180	849	82.9592	10.9739	-2.84985	-		GO:0005737//cytoplasm	-	-	gi|225461699|ref|XP_002285489.1|/1.58486E-134/PREDICTED: pathogen-related protein [Vitis vinifera]
VIT_207s0031g02990	1683	11.7801	1.07593	-2.87073	-		GO:0005739//mitochondrion;GO:0009536//plastid	-	-	gi|302143295|emb|CBI21856.3|/1.0761E-105/unnamed protein product [Vitis vinifera]
VIT_215s0046g03430	781	7.99908	0.555915	-2.87452	-		-	-	-	gi|225451675|ref|XP_002276426.1|/1.46427E-80/PREDICTED: uncharacterized protein LOC100253147 [Vitis vinifera]
VIT_202s0012g01590	1514	51.6575	6.48534	-2.87934	-		-	GO:0005515//protein binding	-	gi|225427169|ref|XP_002277674.1|/2.75075E-135/PREDICTED: uncharacterized protein LOC100245547 [Vitis vinifera]
VIT_201s0011g05310	1247	44.8181	5.49727	-2.89309	-		-	-	-	gi|359496315|ref|XP_003635207.1|/2.32684E-16/PREDICTED: uncharacterized protein LOC100853563 [Vitis vinifera]
VIT_201s0026g02740	1191	67.1053	8.17371	-2.94525	-		-	-	-	gi|225425630|ref|XP_002271277.1|/4.68181E-68/PREDICTED: uncharacterized protein LOC100241338 [Vitis vinifera]
[truncated: 44 more rows]
